# Supplementary material for: Identification and dynamics of the human ZDHHC16-ZDHHC6 palmitoylation cascade
Source: eLife. 2017 Aug 15;6:e27826. doi: 10.7554/eLife.27826 (PMC5582869; doi:10.7554/eLife.27826)
Supplement: Source data 1. [file elife-27826-data1.xlsx]

## Sheet: FIGURE 1
figure 1E
3h-palmitic acid incorporation in myc-DHHC6 wt or mutants
DHHC6	mean	SD n=4		1		2		3		4
wt	100	0		2344	100	2022	100	2449	100	2555	100
aca	28.45	3.11		692.18	29.53	549.38	27.17	610.78	24.94	822	32.17
acc	33.1	3.6		844	36.0068	731	36.1523	770	31.4414	736	28.81
cac	64.02	2.94		1408	60.0683	1339	66.2216	1555	63.4953	1694	66.3
cca	75.7	2.93		1766	75.3413	1571	77.6954	1756	71.7027	1995	78.08
aac	32.54	2.93		766	32.6792	654	32.3442	881	35.9739	736	28.81
caa	49.42	5.65		1189	50.7253	1065	52.6706	1006	41.078	1359	53.19
aaa	9.81	1.73		244	10.4096	243	12.0178	207	8.45243	214	8.38

## Sheet: FIGURE 2
figure 2A
3h-palmitic acid incorporation in myc-DHHC6 after dhhc rnai
DHHC rnai
														SD n=6
													Mean	SD
	value	%
ctle	87760		65579		123345		80668		69056		55408
ctle	85560		66430		113079		75408		73067		59870
ctle	88453		68096		112897		77443		70143		56443				P-Value
mean ctle	87257.7	100	66701.7	100	116440	100	77839.7	100	70755.3	100	57240.3	100	100	4.94351e-06
1	67789	77.6883	45667	68.4646	85540	73.4625	66812	85.8328	65678	92.8241	44387	77.545	79.3029	8.74917	0.000174044
2	87650	100.45	67544	101.263	97750	83.9486	77509	99.5752	75073	106.102	56664	98.9931	98.3886	7.51395	0.61071
3	84430	96.7594	65889	98.7816	114530	98.3594	79008	101.501	71650	101.264	59887	104.624	100.215	2.81536	0.589627
4	85540	98.0315	63689	95.4834	118760	101.992	64312	82.6211	74045	104.649	58876	102.858	97.6058	8.07043	0.471989
5	87760	100.576	67554	101.278	116775	100.287	75008	96.3622	69543	98.2866	54498	95.2091	98.6665	2.46979	0.763984
6	84335	96.6505	60453	90.6319	114780	98.5741	70665	90.7828	66407	93.8544	58076	101.46	95.3256	4.35363	0.132776
7	54490	62.4472	38776	58.1335	115077	98.8292	48879	62.7945	54998	77.7298	50004	87.358	74.5487	16.2346	0.012736
8	82334	94.3573	68574	102.807	114378	98.2289	78507	100.857	70549	99.7084	59335	103.659	99.9364	3.37767	0.00378236
9	55809	63.9588	38860	58.2594	114099	97.9892	64007	82.2293	59433	83.9979	44388	77.5467	77.3302	14.4069	0.00383293
11	88791	101.757	63442	95.1131	114308	98.1687	75132	96.5215	74667	105.528	57449	100.365	99.5756	3.79578	0.00441132
12	88408	101.318	24359	36.5193	116782	100.293	50896	65.3857	59996	84.7936	54443	95.113	80.5706	25.3766	0.0996892
13	88112	100.979	66980	100.417	116554	100.098	78554	100.918	63888	90.2943	57055	99.6762	98.7304	4.16218	0.114312
14	89760	102.868	67043	100.512	80554	69.1805	62056	79.7228	52332	73.9619	48776	85.2126	85.2429	13.8528	0.04546
15	85569	98.0647	68508	102.708	104553	89.7911	60549	77.7868	68887	97.3594	55006	96.0966	93.6345	8.80699	0.238911
16	33900	38.8505	25443	38.1445	65530	56.2778	31078	39.9257	23998	33.9169	23780	41.5441	41.4432	7.70229	7.01235e-07
17	87769	100.586	66980	100.417	115045	98.8017	76430	98.189	72225	102.077	57760	100.908	100.163	1.42913	4.94609e-09
18	40078	45.9306	45308	67.9263	70450	60.5031	54760	70.3497	60004	84.8049	44308	77.407	67.8203	13.5609	0.00017055
19	83224	95.3773	67508	101.209	113078	97.1124	64023	82.2498	70054	99.0088	49882	87.1449	93.6837	7.39052	0.00213788
20	69978	80.197	66533	99.7471	116097	99.7051	81308	104.456	70887	100.186	57764	100.915	97.5343	8.67824	0.426984
21	52887	60.6101	39760	59.6087	120675	103.637	70554	90.6402	73224	103.489	58776	102.683	86.7779	21.2334	0.277357
22	75609	86.6503	67008	100.459	118066	101.396	77452	99.502	73008	103.184	53440	93.3607	97.4254	6.24607	0.265961
23	79605	91.2298	69778	104.612	117600	100.996	78550	100.913	72331	102.227	57611	100.648	100.104	4.58968	0.416833
24	88977	101.97	64559	96.7877	118045	101.378	79445	102.062	70669	99.878	56440	98.6018	100.113	2.10937	0.996855
figure 2D
3h-palmitic acid pulse chase in myc-DHHC6 wt and cystein mutants
time	wt	sd n=3	cca	sd n=3	aac	sd n=3	acc	sd n=3	cac	sd n=3	caa	sd n=3
0	100	0	100	0	100	0	100	0	100	0	100	0
0.5	64.8074	5.22087	67.1806	7.37028	96.6328	2.78233	97.6565	2.34985	70.794	2.90714	71.0682	2.23176
1	34.4013	4.31642	39.8958	2.12209	88.5592	4.60111	87.9537	1.20242	51.4645	3.02951	46.5882	2.06489
2	25.577	3.00747	27.3125	5.41476	78.5451	4.27688	76.4915	1.44249	33.7882	4.5685	27.4442	1.1549
4	11.7748	1.08329	16.4009	2.5657	67.1419	2.49475	54.2813	1.97972	18.4647	2.2984	19.8219	0.842648
6	9.12922	0.336155	9.33268	1.98491	51.7305	2.70493	38.6556	0.454876	11.2036	0.971682	11.4722	1.72656
8	7.73579	1.34938	8.01862	1.07814	40.7894	2.45355	35.8622	2.10735	9.73376	0.176912	8.29761	1.05601
	wt		cca		aac		acc		cac		caa
0	45300	100	54990	100	38889	100	32078	100	30124	100	28865	100
0.5	30008	66.2428	32897	59.8236	36750	94.4997	32089	100.034	21897	72.6895	20654	71.5538
1	16577	36.5938	20678	37.6032	33089	85.0858	28776	89.7063	14332	47.5767	12765	44.2231
2	10078	22.2472	12078	21.964	30786	79.1638	24439	76.1862	8856	29.3985	8443	29.25
4	5408	11.9382	7809	14.2008	25440	65.417	17554	54.7229	5122	17.0031	6007	20.8107
6	4209	9.29139	4123	7.49773	20786	53.4496	12440	38.7805	3221	10.6925	3228	11.1831
8	3997	8.8234	4078	7.41589	16554	42.5673	10665	33.2471	3005	9.97543	2056	7.12281
	wt		cca		aac		acc		cac		caa
0	53400	100	44390	100	49980	100	38004	100	29956	100	29956	100
0.5	35499	66.4775	33099	74.5641	49870	99.7799	36231	95.3347	20065	66.9816	22513	75.1536
1	18665	34.9532	17886	40.2929	46870	93.7775	33217	87.404	16040	53.5452	14480	48.3376
2	14430	27.0225	14556	32.7912	41223	82.479	29956	78.8233	11543	38.5332	8118	27.0997
4	5877	11.0056	7006	15.7828	32990	66.0064	22008	57.9097	6443	21.5082	6440	21.4982
6	4998	9.35955	5078	11.4395	26554	53.1293	15011	39.4985	3766	12.5718	4286	14.3077
8	3087	5.7809	4112	9.26335	20897	41.8107	14220	37.4171	2885	9.63079	2765	9.2302
	wt		cca		aac		acc		cac		caa
0	59880	100	45007	100	40650	100	39965	100	30078	100	31078	100
0.5	38996	65.1236	30224	67.154	38869	95.6187	39006	97.6004	21870	72.711	20666	66.4972
1	21089	35.2188	18809	41.7913	35290	86.8143	34670	86.7509	16023	53.2715	14670	47.2038
2	17660	29.4923	12234	27.1824	30078	73.9926	29760	74.4652	10056	33.4331	8075	25.983
4	6534	10.9118	8650	19.2192	28456	70.0025	20067	50.2114	5078	16.8828	5332	17.1568
6	5530	9.23514	4078	9.06081	19761	48.6125	15062	37.688	3112	10.3464	2774	8.92593
8	5013	8.37174	3320	7.37663	15443	37.9902	14756	36.9223	2886	9.59505	2654	8.5398
figure 2F
3h-palmitic acid incorporation in myc-DHHC6 after APTs overexpression
dhhc6-myc with		1		2		3		4		5		6		mean	SD n=6
ctle	23455	100	24312	100	29786	100	20067	100	22453	100	28765	100	control	100	0
apt1-wt	24332	103.739	22670	93.2461	29453	98.882	17554	87.477	23098	102.873	27665	96.1759	apt1-wt	97.0655	6.1462
apt1-c2a	24877	106.063	24389	100.317	28956	97.2135	19967	99.5017	24387	108.614	27543	95.7518	apt1-c2a	101.243	5.05639
apt1- sa	24179	103.087	24087	99.0745	29765	99.9295	19887	99.103	22976	102.329	28650	99.6002	apt1-sa	100.521	1.74091
apt2-wt	13422	57.2245	10786	44.3649	13208	44.343	8640	43.0558	12324	54.888	15765	54.8062	apt2-wt	49.7804	6.49421
apt2-c2a	20786	88.6208	20785	85.4928	27430	92.0902	18567	92.525	19987	89.0171	27660	96.1585	apt2-c2a	90.6507	3.72331
apt2-sa	15553	66.31	15540	63.9191	22870	76.781	12970	64.6335	17659	78.6487	22340	77.6638	apt2-sa	71.326	7.04786

## Sheet: FIGURE3
figure 3ABC
3h-palmitic acid pulse chase in myc-DHHC6 wt and cystein mutants, with or without overexpression DHHC16, RNAi APT2
20min pulse
moyenne 20min pulse
time	WT	wt-sd-N=3	wt+DHHC16	SD-wt+P16, N=3	wt+RNAi apt2	SD-wt+RNAiapt2 N=3	ACC	SD-acc N=3	acc+DHHC16	SD-acc+DHHC16, N=3	acc+RNAiapt2	SD-acc+RNAiapt2	CAA	SD-caa N=3	caa+DHHC16	SD-caa+DHHC16, N=3	caa+Rnai apt2	SD caa+RNAi apt2 N=3
0	100	0	100	0	100	0	100	0	100	0	100	0	100	0	100	0	100	0
0.5	99.8962	0.608051	89.0783	2.36685	87.549	0.46351	99.4214	1.23756	92.6934	3.94752	94.9333	1.23875	99.7005	1.63679	88.6939	10.8009	84.3741	2.65421
1	95.5846	0.624484	75.3221	2.6714	67.0128	4.24057	96.2519	1.77214	85.5961	0.739719	94.3269	2.06722	96.9458	1.68212	73.5726	8.33704	79.2905	2.54508
2	84.1444	0.603243	65.1506	2.03855	45.9063	0.195403	89.0339	0.853569	74.6572	7.73582	86.0271	3.39019	89.4737	4.47942	63.9425	3.0554	72.1779	5.42965
3	75.9366	1.40352	50.7152	2.61705	33.3916	3.05987	73.4069	0.06143	67.3524	3.07427	75.3992	2.36524	78.3126	5.02986	53.0862	4.1602	54.3237	3.51548
5	63.115	1.38481	34.4148	4.37693	27.3166	2.75488	62.4058	3.26205	55.2835	2.43234	62.267	5.21049	70.7701	2.34227	42.0678	7.53215	39.5829	2.34364
20	45.1886	0.80368	17.8754	3.49862	13.3966	0.467465	49.9105	2.33953	47.5877	5.53353	49.312	6.36912	60.5103	5.83057	21.5613	4.84067	19.7388	4.91963
24	37.8532	1.36283	13.0411	0.387174	14.0711	1.45816	45.8224	0.69793	39.0058	6.68809	41.5821	9.19749	49.0096	9.67984	12.4883	1.58283	16.6954	2.20728
	1	WT	1	wt+DHHC16	1	wt+RNAi apt2	1	ACC	1	acc+DHHC16	1	acc+RNAiapt2	1	CAA	1	caa+DHHC16	1	caa+Rnai apt2
	87655	100	77044	100	70123	100	89978	100	154433	100	95554	100	113208	100	133089	100	117654	100
	88097	100.504	70453	91.4451	61067	87.0855	88670	98.5463	144309	93.4444	90675	94.894	110766	97.8429	130065	97.7278	98067	83.352
	84332	96.209	60089	77.9931	49965	71.2534	87733	97.5049	130877	84.7468	92210	96.5004	111780	98.7386	110655	83.1436	91223	77.535
	73228	83.5412	51765	67.1889	32054	45.7111	80654	89.6375	111056	71.9121	85540	89.5201	95476	84.3368	86665	65.1181	88564	75.275
	65332	74.5331	41089	53.3319	25555	36.4431	66011	73.3635	108055	69.9689	70655	73.9425	94443	83.4243	65540	49.2452	65554	55.7176
	54110	61.7306	29886	38.7908	21087	30.0714	54076	60.0991	88560	57.3453	62048	64.935	80342	70.9685	55508	41.7074	43409	36.8955
	39123	44.6329	11078	14.3788	9067	12.9301	43420	48.2562	83332	53.96	42208	44.1719	74453	65.7666	35112	26.3823	21098	17.9322
	32076	36.5935	10342	13.4235	8845	12.6136	40786	45.3289	68675	44.4691	29678	31.0589	51064	45.1064	15540	11.6764	21897	18.6114
	2	WT	2	wt+DHHC16	2	wt+RNAi apt2	2	ACC	2	acc+DHHC16	2	acc+RNAiapt2	2	CAA	2	caa+DHHC16	2	caa+Rnai apt2
	155432	100	133209	100	111324	100	162111	100	86605	100	90887	100	96654	100	133221	100	120776	100
	154328	99.2882	115505	86.7115	97976	88.0125	162597	100.296	83324	96.2115	87424	96.1912	97554	100.931	102221	76.7304	105543	87.3874
	147598	94.9602	96776	72.6511	69878	62.7723	155078	95.68	74430	85.9419	83970	92.3855	92210	95.4022	90445	67.8909	94359	78.1273
	131729	84.7476	84068	63.1123	51320	46.1014	145867	89.98	72221	83.3913	77990	85.8113	88456	91.5182	80564	60.4739	91005	75.3502
	120211	77.34	64073	48.0986	33776	30.3402	119119	73.48	58997	68.1219	71011	78.1283	75530	78.1447	76609	57.5052	68756	56.9285
	100254	64.4993	40016	30.0388	27341	24.5617	100606	62.06	45555	52.6009	51133	56.2628	70564	73.0068	66309	49.7737	49097	40.6513
	710946	45.7443	28467	21.3721	15429	13.863	85805	52.93	38806	44.808	51297	56.4372	59467	61.5256	28776	21.6002	30564	25.3064
	60789	39.113	16864	12.6586	17289	15.5286	76079	46.93	35509	41.0011	43698	48.0847	58023	60.0317	19067	14.3123	20765	17.193
	3	WT	3		3		3	ACC	3	acc+DHHC16	3	acc+RNAiapt2		CAA	3	caa+DHHC16	3	caa+Rnai apt2
	99650	100	88553	100	87613	100	132805	100	122345	100	128887	100		100	86754	100	75523	100
	99560	99.9083	78901	89.1047	76696	87.5369	132088	99.457	108177	88.4244	120786	93.7146		100.327	79487	91.6234	62218	82.3829
	952355	95.5668	66769	75.4026	58736	67.0382	127001	95.63	105339	86.0995	121276	94.0948		96.6967	60453	69.6832	62087	82.2094
	83845	84.1354	57745	65.2073	40206	45.8888	116271	87.55	84014	68.6683	106654	82.75		92.5661	57462	66.2356	49776	65.9084
	75644	75.913	44985	50.7967	28912	32.999	97306	73.27	78264	63.9665	95540	74.1269		73.3688	45553	52.5082	38007	50.3251
	62959	63.1802	30613	34.5683	23953	27.3384	86894	65.43	68391	55.9042	84554	65.6032		68.3349	30123	34.7223	31117	41.202
	46028	46.1943	15647	17.6714	11784	13.4508	62378	46.97	53819	43.995	60998	47.3267		54.2388	14489	16.7012	12067	15.9779
	36821	36.9528	11963	13.1458	12266	13.9977	57040	42.95	38600	31.5471	58776	45.6027		41.8908	9956	11.4761	10786	14.2817

## Sheet: FIGURE4
figure 4B
Size and number of dots of DHHC6-myc
AVERAGE	WT			AAA
	no dot	small dot	big dot	no dot	small dot	big dot
	11.6667	3	14.6667	9	15.3333	3.33333
%	38.8889	10	48.8889	30	51.1111	11.1111
STD	WT			AAA
	no dot	small dot	big dot	no dot	small dot	big dot
	2.88675	1.73205	2.51661	2.64575	0.57735	2.88675
figure 4C
Co-Immunoprecipitation of myc-DHHC6 wt with GFP-DHHC6 mutants
	1		2		3		4		mean	SD, N=4
wt	45053	100	33320	100	44308	100	33312	100	100	0
aaa	15443	34.2774	12776	38.3433	21887	49.3974	12079	36.2602	39.5696	6.75891
deltaDHHC	30675	68.0865	25554	76.6927	41118	92.8004	26262	78.8365	79.104	10.2447
figure 4H
3h-palmitic acid incorporation in endogenous calnexin after overexpression of myc-DHHC6 wt or mutants
calnexin	mean	SD			1		2		3		4
control	100	0			4423	100	3770	100	3321	100	3980	100
wt	260.8	18.2082			10886	246.123	9530	252.785	9540	287.263	10227	256.97
aca	122.56	5.45454			5306	119.97	4485	118.98	40041	120.57	5201	130.67
acc	132.75	10.6349			6054	136.875	4886	129.602	3978	119.783	5761	144.76
cac	196.99	19.4928			8670	196.021	6408	169.973	6908	208.01	8515	213.95
cca	208.96	17.6378			8509	192.381	7621	202.149	7760	233.665	8265	207.66
aac	135.78	13.1588			5443	123.061	5078	134.695	5118	154.11	5224	131.25
caa	189.78	21.5424			7506	169.704	6511	172.706	6852	206.323	8373	210.37
aaa	102.65	2.89252			4498	101.696	3906	103.607	3522	106.052	3949	99.23

## Sheet: FIGURE5
FIGURE 5B	experimental	DATA
35s-methionin 20min pulse chase myc-DHHC6 wt , cystein mutants and DHHC16 overexpression
	wt	wt, SD N=12	WT+DHHC16	WT+DHHC16, SD N=3	ACC, N=3	ACC, SD N=3
0	100	0	100	0	100	0
0.5	99.8962	0.859857	89.0783	3.34717	99.4214	1.23756
1	95.5846	0.883034	75.3221	3.77736	96.2519	1.77214
2	84.1444	0.853083	65.1506	2.88257	89.0339	0.853569
3	75.9366	1.98478	50.7152	3.70046	73.4069	0.06143
5	63.115	1.9577	34.4148	6.18864	62.4058	3.26205
20	45.1886	0.78584	17.8754	4.94499	49.9105	2.33953
24	37.8532	1.78159	13.0411	0.540834	45.8224	0.69793
3h-palmitic acid pulse chase in myc-DHHC6 wt and cystein mutants
time	wt	WT, sd n=3	CCA	sd n=3	AAC	sd n=3	ACC	sd n=3
0	100	0	100	0	100	0	100	0
0.5	64.8074	5.22087	67.1806	7.37028	96.6328	2.78233	97.6565	2.34985
1	34.4013	4.31642	39.8958	2.12209	88.5592	4.60111	87.9537	1.20242
2	25.577	3.00747	27.3125	5.41476	78.5451	4.27688	76.4915	1.44249
4	11.7748	1.08329	16.4009	2.5657	67.1419	2.49475	54.2813	1.97972
6	9.12922	0.336155	9.33268	1.98491	51.7305	2.70493	38.6556	0.454876
8	7.73579	1.34938	8.01862	1.07814	40.7894	2.45355	35.8622	2.10735
FIGURE 5B
S35											H3
Time (h)	DHHC6 WT (%)	ub	lb	DHHC6 WT Ov. (%)	ub	lb	DHHC6 ACC (%)	ub	lb		Time (h)	DHHC6 WT H3 (%)	ub	lb	DHHC6 ACC H3 (%)	ub	lb	DHHC AAC H3 (%)	ub	lb	DHHC CCA H3 (%)	lb	ub
0	100	0	0	100	0	0	100	0	0		0	100	0	0	100	0	0	100	0	0	100	0	0
0.001	100.288	0.00199647	0.000992119	99.9815	0.00460678	0.00232669	100.285	0.00202077	0.000999853		0.01	99.415	0.0817031	0.0534502	99.8659	0.0216739	0.018042	99.9912	0.00415516	0.00263239	99.9396	0.008229	0.00588946
0.501	99.2364	1.49643	0.759455	90.9481	1.84351	1.14372	96.8507	1.42486	0.749401		0.02	98.8334	0.161785	0.106008	99.7311	0.0437038	0.0352197	99.9027	0.0456329	0.0286137	99.3362	0.0894614	0.0653967
1.001	92.6177	1.84317	1.06708	83.3223	2.33139	1.68602	90.474	1.81931	1.00867		0.03	98.2552	0.240369	0.157948	99.596	0.0656717	0.0519767	99.8143	0.0869931	0.0545236	98.7353	0.168751	0.125397
1.501	87.4062	1.34953	1.10742	76.8118	2.99416	2.2032	85.5676	1.56733	0.961671		0.04	97.6804	0.317559	0.209401	99.4607	0.0876127	0.0682829	99.7261	0.12825	0.0803688	98.1376	0.246599	0.185263
2.001	83.2718	0.884532	0.989007	71.4033	4.38676	2.64222	81.7617	1.33651	0.74423		0.05	97.1092	0.397768	0.260425	99.3251	0.10958	0.0840901	99.638	0.169411	0.10615	97.5433	0.323175	0.24472
2.501	80.0395	0.722994	0.750722	66.4932	5.81178	2.82814	78.7575	0.879956	0.465323		0.06	96.5416	0.474394	0.31104	99.1892	0.131569	0.0994061	99.5499	0.210482	0.131869	96.9525	0.398557	0.30362
3.001	77.2694	0.760277	0.566477	62.4193	7.45227	3.16473	76.3373	0.420196	0.193279		0.07	95.9775	0.54957	0.36111	99.053	0.153577	0.114239	99.462	0.251464	0.157526	96.3653	0.47277	0.361886
3.501	74.9453	0.712219	0.380269	58.8304	9.61059	3.76578	74.2421	0.192711	0.126593		0.08	95.4179	0.624571	0.40991	98.9165	0.175599	0.125928	99.3742	0.29236	0.183123	95.7818	0.545817	0.419478
4.001	72.8636	0.628043	0.424535	55.1861	9.11366	4.90181	72.3704	0.312242	0.40827		0.09	94.862	0.698741	0.458109	98.7806	0.196735	0.137934	99.2865	0.333171	0.208659	95.2019	0.617692	0.476377
4.501	70.9907	0.560608	0.515196	52.1308	9.70084	5.63021	70.8396	0.55859	0.597399		0.1	94.3098	0.77208	0.505716	98.6449	0.217471	0.151911	99.1989	0.373896	0.234137	94.6234	0.686243	0.534266
5.001	69.2944	0.590828	0.686246	49.2349	10.1311	6.65561	69.5069	0.746056	0.771499		0.11	93.7613	0.844586	0.55274	98.5088	0.238291	0.165324	99.1114	0.414537	0.259556	94.046	0.751022	0.591026
5.501	67.8117	0.708884	0.769036	46.9203	10.9917	7.38386	68.3127	0.922643	0.881167		0.12	93.2165	0.916424	0.59902	98.3722	0.259255	0.17817	99.024	0.455093	0.284917	93.4734	0.815861	0.645293
6.001	66.4605	0.753804	0.849203	44.6862	11.2653	8.19767	67.1957	1.04665	1.03974		0.13	92.6756	0.987661	0.646124	98.2358	0.279899	0.19105	98.9367	0.495565	0.310221	92.9068	0.881933	0.69593
6.501	65.2015	0.810286	0.88734	42.3269	12.0383	8.99677	66.1645	1.11735	1.12312		0.14	92.1384	1.05809	0.698974	98.0987	0.300862	0.203172	98.8495	0.535954	0.335469	92.3437	0.946847	0.74536
7.001	64.0828	0.899324	0.939687	40.2049	12.4755	9.65511	65.316	1.2215	1.10202		0.15	91.6047	1.1277	0.751992	97.9614	0.321836	0.214848	98.7624	0.576258	0.360661	91.7842	1.01061	0.79362
7.501	63.0404	1.05715	1.01248	38.4592	13.0621	10.3169	64.5603	1.36565	1.11491		0.16	91.0745	1.1965	0.805142	97.824	0.342629	0.226269	98.6754	0.616478	0.385798	91.2283	1.07322	0.840745
8.001	62.017	1.19987	1.17045	36.4255	13.2727	11.5271	63.7559	1.39068	1.18456		0.17	90.5479	1.26447	0.851327	97.6881	0.361645	0.239037	98.5885	0.656615	0.41088	90.6758	1.13469	0.886769
8.501	61.1041	1.33956	1.21499	34.5079	13.4664	12.3602	63.0697	1.58505	1.19353		0.18	90.0248	1.33162	0.895635	97.5523	0.380397	0.251639	98.5017	0.696668	0.435909	90.1268	1.19502	0.931727
9.001	60.188	1.38846	1.29089	33.0992	14.0781	12.6602	62.3964	1.64497	1.27721		0.19	89.5052	1.39794	0.939369	97.415	0.40031	0.263329	98.415	0.736637	0.460883	89.5813	1.25422	0.975652
9.501	59.2273	1.42103	1.40047	31.8188	14.6139	12.9012	61.7844	1.78708	1.3427		0.2	88.989	1.46343	0.982536	97.2768	0.420962	0.273961	98.3284	0.776523	0.485804	89.0393	1.31229	1.02398
10.001	58.3959	1.39494	1.4681	30.4784	14.8939	13.3358	61.1423	1.76281	1.41734		0.21	88.4763	1.5281	1.02514	97.139	0.439361	0.284934	98.2418	0.816325	0.510673	88.5006	1.36926	1.07295
10.501	57.5942	1.5479	1.46908	29.0313	14.9193	13.9475	60.5556	1.76542	1.46344		0.22	87.9669	1.59194	1.0672	97.0022	0.455662	0.295704	98.1554	0.856043	0.535489	87.9653	1.42512	1.12145
11.001	56.8422	1.68065	1.49423	27.5999	14.8248	14.5024	60.0132	1.98652	1.49329		0.23	87.4609	1.65495	1.10871	96.8653	0.471582	0.305576	98.0691	0.895678	0.560253	87.4334	1.47988	1.16948
11.501	56.1601	1.94556	1.41485	26.3817	14.7907	14.5742	59.4508	1.95682	1.53844		0.24	86.9582	1.71713	1.14968	96.7284	0.487126	0.315175	97.9829	0.935229	0.584966	86.9048	1.53356	1.21706
12.001	55.4911	2.11188	1.37241	25.4651	14.931	14.7766	58.8557	2.05556	1.63842		0.25	86.4588	1.7785	1.19011	96.5915	0.50141	0.324823	97.8967	0.974697	0.609628	86.3796	1.58616	1.26418
12.501	54.7757	2.21232	1.35277	24.3677	14.7946	15.1868	58.3586	2.25276	1.64992		0.26	85.9628	1.83904	1.23002	96.454	0.514312	0.334089	97.8107	1.01408	0.634239	85.8576	1.6377	1.31086
13.001	54.079	2.31333	1.33487	23.3366	14.6372	15.618	57.8265	2.24424	1.69273		0.27	85.4699	1.89877	1.26941	96.3153	0.528004	0.341518	97.7247	1.05338	0.6588	85.3389	1.68818	1.3571
13.501	53.2845	2.29978	1.54096	22.3519	14.4465	15.9853	57.305	2.30613	1.71087		0.28	84.9804	1.95769	1.30828	96.1764	0.541311	0.348612	97.6389	1.0926	0.68331	84.8234	1.73762	1.40291
14.001	52.5621	2.2972	1.60632	21.4109	14.2273	16.1287	56.8267	2.46447	1.71711		0.29	84.494	2.0158	1.34664	96.0374	0.55424	0.355377	97.5531	1.13174	0.707771	84.3112	1.78603	1.44829
14.501	51.8884	2.3165	1.74609	20.5112	13.9987	16.1477	56.3366	2.67298	1.72599		0.3	84.0108	2.07311	1.3845	95.8995	0.565604	0.36301	97.4674	1.17079	0.732183	83.8022	1.83342	1.49324
15.001	51.2498	2.44319	1.81027	19.6506	13.7514	16.1498	55.8672	2.82176	1.72721		0.31	83.5308	2.12962	1.42186	95.7633	0.574879	0.37198	97.3818	1.20976	0.756545	83.2963	1.8798	1.53778
15.501	50.5694	2.48471	1.87597	18.8273	13.484	16.5144	55.4107	2.919	1.73122		0.32	83.0539	2.18535	1.4582	95.627	0.586999	0.380684	97.2963	1.24864	0.780859	82.7936	1.92518	1.58191
16.001	49.9281	2.36128	1.89322	18.0392	13.1999	16.6861	54.9413	3.12816	1.75045		0.33	82.5802	2.24028	1.49327	95.4909	0.599751	0.38922	97.2109	1.28744	0.805125	82.2941	1.96957	1.62564
16.501	49.2579	2.30158	1.9252	17.2849	12.9022	16.7153	54.4878	3.34527	1.82107		0.34	82.1095	2.29443	1.52777	95.3548	0.612212	0.397591	97.1256	1.32616	0.829342	81.7976	2.01298	1.66896
17.001	48.6018	2.30869	2.04176	16.5627	12.5937	16.6764	54.0349	3.55463	1.85671		0.35	81.6419	2.34781	1.56171	95.2187	0.624387	0.405799	97.0404	1.3648	0.853511	81.3043	2.05543	1.71189
17.501	48.007	2.40625	2.15466	15.8711	12.277	16.6925	53.6059	3.77939	1.82701		0.36	81.1774	2.40042	1.5951	95.0869	0.632169	0.417959	96.9552	1.40336	0.877633	80.814	2.09972	1.75443
18.001	47.4246	2.5147	2.2494	15.3301	12.0756	16.5722	53.1307	3.97406	1.86507		0.37	80.7158	2.45227	1.62794	94.9562	0.638509	0.432281	96.8702	1.44183	0.901708	80.3268	2.14647	1.79705
18.501	46.8048	2.58444	2.29785	14.8106	11.8636	16.4442	52.6877	4.19781	1.88875		0.38	80.2573	2.50336	1.66024	94.8255	0.644734	0.446495	96.7852	1.48022	0.925735	79.8426	2.19245	1.84018
19.001	46.3011	2.75856	2.21167	14.31	11.6417	16.3107	52.2592	4.42699	1.90922		0.39	79.7999	2.55182	1.69389	94.6887	0.656881	0.454416	96.7003	1.51852	0.949716	79.3614	2.23769	1.88297
19.501	45.6786	2.80236	2.32198	13.8399	11.424	16.1599	51.8029	4.61966	1.9484		0.4	79.3454	2.59947	1.72708	94.5517	0.665028	0.462015	96.6156	1.55675	0.97365	78.8832	2.28219	1.92543
20.001	45.0641	2.84544	2.43854	13.3527	11.1653	16.039	51.3736	4.8307	2.02519		0.41	78.8938	2.64632	1.75981	94.4147	0.672126	0.469445	96.5309	1.59489	0.997537	78.4079	2.32596	1.96756
											0.42	78.445	2.69237	1.79209	94.2813	0.675297	0.480269	96.4463	1.63295	1.02138	77.9356	2.369	2.00937
											0.43	77.999	2.73764	1.82392	94.1481	0.678854	0.49121	96.3617	1.67093	1.04517	77.4663	2.41132	2.05085
FIGURE 5C											0.44	77.5559	2.78213	1.85531	94.0152	0.687142	0.502121	96.2773	1.70883	1.06893	76.9998	2.45293	2.09201
	C000	C100	C010	C001	C110	C101	C011	C111			0.45	77.1144	2.82466	1.88714	93.8823	0.696145	0.512988	96.1929	1.74664	1.09263	76.5363	2.49383	2.13284
ub	25.7128	3.47957	55.6295	10.7791	2.74528	2.76243	421.207	0.0851185			0.46	76.6702		1.92372	93.7496	0.704918	0.521499	96.1087	1.78437	1.11629	76.0756	2.53404	2.17337
mean (h)	39.4971	5.2231	228.872	16.6941	6.20966	8.25589	1329.94	0.255049			0.47	76.2287		1.95949	93.6171	0.713463	0.529355	96.0245	1.82203	1.1399	75.6177	2.57355	2.21357
lb	51.2731	7.63813	1921.03	31.4961	22.6851	19.6237	8857.11	0.938705			0.48	75.7898		1.99496	93.4847	0.721784	0.540383	95.9403	1.85948	1.16359	75.1627	2.61238	2.25347
											0.49	75.3534		2.03013	93.3525	0.729884	0.55139	95.856	1.89665	1.18743	74.7105	2.65053	2.29305
											0.5	74.9197		2.06499	93.2204	0.737767	0.562373	95.7717	1.93373	1.21124	74.2611	2.68801	2.33233
FIGURE 5D											0.51	74.4886		2.09955	93.0884	0.745437	0.573334	95.6875	1.97073	1.23501	73.8145	2.72483	2.3713
		Incorporation			Loss
	C000→C100	C000→C010	C000→C001	C000←C100	C000←C010	C000←C001					0.52	74.06		2.13381	92.9531	0.756398	0.580768	95.6035	2.00763	1.25874	73.3706	2.76099	2.40997
ub	4.5979	0.128962	0.196044	2.65123	2.04793	0.010332					0.53	73.6359		2.16594	92.8149	0.77023	0.5851	95.5194	2.04445	1.28244	72.9319	2.79888	2.44597
mean (1E03[C]/h)	3.27207	0.0538793	0.0749953	1.82805	1.27136	0.00377808					0.54	73.2203		2.19378	92.6766	0.782888	0.589225	95.4355	2.08117	1.3061	72.4974	2.83767	2.47841
lb	2.24078	0.0162719	0.0371287	0.959056	0.846095	0.00101473					0.55	72.8074		2.22309	92.5383	0.794588	0.593145	95.3516	2.11781	1.32973	72.0657	2.87594	2.50872
											0.56	72.3971		2.24829	92.4	0.806202	0.596181	95.2678	2.15436	1.35332	71.6369	2.91368	2.53854
FIGURE 5F											0.57	71.9894		2.27308	92.2616	0.81773	0.598502	95.1841	2.19081	1.37688	71.2108	2.95091	2.56789
	U	C000	C100	C010	C001	C110	C101	C011	C111		0.58	71.5843		2.29744	92.1233	0.829173	0.600592	95.1005	2.22718	1.4004	70.7874	2.98763	2.59676
ub	2.29297	22.2279	2.76361	8.20023	0.180559	0.528866	0.0432939	4.87031	0.00700913		0.59	71.1818		2.32139	91.9849	0.840532	0.602454	95.0169	2.26347	1.42389	70.3664	3.02338	2.62563
mean (%)	6.81243	70.2578	7.73736	11.3452	0.183665	0.254587	0.0130002	3.45162	0.00129467		0.6	70.7793		2.34739	91.8465	0.851808	0.60409	94.934	2.30026	1.44675	69.9439	3.05449	2.65816
lb	2.85934	23.8738	2.80698	4.61915	0.108832	0.201887	0.00932725	1.92196	0.000933105		0.61	70.3793		2.37315	91.7081	0.863001	0.605712	94.8514	2.33716	1.46938	69.524	3.08501	2.69035
											0.62	69.9818		2.39849	91.5696	0.874202	0.609103	94.7688	2.37398	1.49195	69.1067	3.11493	2.72218
											0.63	69.5868		2.42339	91.4312	0.889225	0.612325	94.6864	2.41074	1.51448	68.6919	3.14426	2.75368
											0.64	69.1944		2.44787	91.293	0.904015	0.615623	94.6041	2.44743	1.53695	68.2797	3.16857	2.78483
											0.65	68.8045		2.47193	91.1589	0.914789	0.622779	94.5218	2.48405	1.55937	67.87	3.19175	2.81565
											0.66	68.417		2.49558	91.0248	0.925479	0.628862	94.4396	2.5206	1.58173	67.4628	3.21427	2.84613
											0.67	68.0321		2.51881	90.8909	0.936086	0.632893	94.3576	2.55708	1.60405	67.0581	3.23612	2.87751
											0.68	67.6496		2.54163	90.757	0.94661	0.639119	94.2756	2.59349	1.62631	66.6559	3.25733	2.90948
											0.69	67.2695		2.56404	90.6232	0.957051	0.649843	94.1937	2.62984	1.64853	66.2562	3.2761	2.94115
											0.7	66.8919		2.58605	90.492	0.96265	0.659909	94.1119	2.66611	1.67069	65.8589	3.29402	2.97254
											0.71	66.5167		2.60766	90.3617	0.961686	0.669951	94.0302	2.70232	1.6928	65.464	3.30763	3.00363
											0.72	66.1439		2.62888	90.2316	0.96047	0.679983	93.9486	2.73845	1.71486	65.0715	3.31742	3.03444
											0.73	65.7735		2.6497	90.1017	0.959007	0.690004	93.867	2.77452	1.73687	64.6815	3.32646	3.06495
											0.74	65.4054		2.67014	89.9697	0.958949	0.697737	93.7856	2.81052	1.75883	64.2938	3.33478	3.09519
											0.75	65.0397		2.6902	89.8366	0.957811	0.704255	93.7042	2.84644	1.78074	63.9085	3.34237	3.12514
											0.76	64.6763		2.70987	89.7036	0.956469	0.710693	93.623	2.8823	1.80261	63.5256	3.34926	3.15481
											0.77	64.3153		2.72917	89.5707	0.954927	0.717053	93.5418	2.91809	1.82442	63.145	3.35545	3.1842
											0.78	63.9565		2.7481	89.4379	0.95165	0.723333	93.4607	2.95381	1.84619	62.7667	3.36095	3.21332
											0.79	63.6001		2.76666	89.3052	0.945846	0.729535	93.3797	2.98946	1.8679	62.3907	3.36577	3.24216
											0.8	63.2459		2.78485	89.1727	0.941552	0.735068	93.2988	3.02504	1.88957	62.017	3.36992	3.27073
											0.81	62.894		2.80268	89.0402	0.938773	0.740135	93.218	3.06056	1.91119	61.6456	3.37341	3.29903
											0.82	62.5443		2.82015	88.9078	0.935773	0.74512	93.1372	3.096	1.93276	61.2765	3.37625	3.32706
											0.83	62.1969		2.83728	88.7743	0.933822	0.748755	93.0566	3.13137	1.95429	60.9096	3.37846	3.35482
											0.84	61.8539		2.85184	88.6366	0.940103	0.749471	92.976	3.16668	1.97577	60.545	3.38003	3.38232
											0.85	61.5133		2.86588	88.499	0.94555	0.753828	92.8955	3.20191	1.9972	60.184	3.38241	3.40813
											0.86	61.1749		2.87975	88.3614	0.943236	0.758093	92.8151	3.23708	2.01858	59.8265	3.38766	3.43239
											0.87	60.8387		2.89333	88.2239	0.941206	0.762266	92.7348	3.27217	2.03992	59.4712	3.4017	3.45636
											0.88	60.5051		2.90623	88.0864	0.942722	0.766347	92.6546	3.3072	2.06121	59.1182	3.41525	3.48003
											0.89	60.1738		2.92193	87.949	0.944112	0.770337	92.5744	3.34216	2.08246	58.7673	3.42832	3.5034
											0.9	59.8448		2.93751	87.8118	0.945121	0.774493	92.4944	3.37705	2.10366	58.4187	3.44092	3.52648
											0.91	59.5178		2.95282	87.6794	0.946211	0.783305	92.4144	3.41187	2.12481	58.0722	3.45304	3.54927
											0.92	59.1929		2.96784	87.5472	0.951035	0.792098	92.3345	3.44662	2.14592	57.7279	3.46469	3.57177
											0.93	58.8663		2.98639	87.4151	0.955757	0.80087	92.2547	3.4813	2.16698	57.3858	3.47589	3.59398
											0.94	58.5417		3.0048	87.2831	0.960376	0.809622	92.175	3.51591	2.188	57.0458	3.48663	3.6159
											0.95	58.2191		3.023	87.1501	0.966009	0.817239	92.0954	3.55045	2.20897	56.7103	3.49927	3.6352
											0.96	57.8985		3.04098	87.0149	0.967898	0.819445	92.0158	3.58493	2.2299	56.3786	3.51471	3.65243
											0.97	57.5798		3.05874	86.8798	0.969038	0.819108	91.9363	3.61933	2.25078	56.0491	3.53016	3.66933
											0.98	57.2631		3.07628	86.7447	0.973113	0.81867	91.8569	3.65367	2.27162	55.7218	3.54525	3.68592
											0.99	56.9484		3.09362	86.6098	0.97914	0.818134	91.7776	3.68793	2.29242	55.3965	3.55996	3.70219
											1	56.6357		3.11016	86.4727	0.988026	0.815198	91.6984	3.72213	2.31317	55.0733	3.57432	3.71815
											1.01	56.3249		3.12356	86.3381	0.993171	0.81455	91.6193	3.75626	2.33388	54.7523	3.58831	3.73381
											1.02	56.0159		3.13795	86.2039	0.997812	0.814238	91.5402	3.79032	2.35454	54.4333	3.60195	3.74916
											1.03	55.709		3.15299	86.0662	1.00608	0.813692	91.4612	3.82431	2.37517	54.1163	3.62343	3.7642
											1.04	55.4039		3.16781	85.9286	1.01507	0.814752	91.3823	3.85823	2.39574	53.8014	3.6454	3.77895
											1.05	55.1006		3.18241	85.7911	1.02499	0.815774	91.3035	3.89208	2.41628	53.4885	3.6671	3.7934
											1.06	54.7993		3.19679	85.6538	1.03365	0.815241	91.2248	3.92586	2.43677	53.1776	3.69585	3.80756
											1.07	54.4998		3.21095	85.5165	1.04223	0.814987	91.1461	3.95958	2.45722	52.8688	3.72865	3.82143
											1.08	54.2022		3.22489	85.3762	1.05386	0.812467	91.0676	3.99322	2.47763	52.5619	3.76117	3.83501
											1.09	53.9064		3.23862	85.2359	1.06559	0.809736	90.9891	4.0268	2.498	52.257	3.7934	3.84831
											1.1	53.6124		3.25214	85.0957	1.07726	0.805365	90.9106	4.06031	2.51832	51.954	3.82534	3.86133
											1.11	53.3203		3.26545	84.9555	1.08722	0.797578	90.8323	4.09375	2.5386	51.653	3.85699	3.87407
											1.12	53.0299		3.27855	84.8223	1.08895	0.796448	90.7541	4.12712	2.55884	51.3539	3.8847	3.88653
											1.13	52.7422		3.29068	84.6946	1.08512	0.80072	90.6759	4.16042	2.57904	51.0568	3.90771	3.89873
											1.14	52.457		3.3017	84.567	1.08117	0.804961	90.5978	4.19365	2.5992	50.7615	3.93041	3.91065
											1.15	52.1737		3.31247	84.4397	1.0771	0.809173	90.5198	4.22682	2.61932	50.4682	3.95282	3.9223
											1.16	51.8922		3.32301	84.3125	1.07291	0.813355	90.4418	4.25991	2.63939	50.1767	3.97493	3.93369
											1.17	51.6125		3.33332	84.1854	1.06861	0.818837	90.364	4.29294	2.65943	49.8902	3.99991	3.94166
											1.18	51.3345		3.3434	84.0585	1.06419	0.826571	90.2862	4.3259	2.67942	49.6079	4.02687	3.94709
											1.19	51.0583		3.35325	83.9262	1.06958	0.825532	90.2085	4.35879	2.69938	49.3274	4.05352	3.95349
											1.2	50.7839		3.36287	83.7921	1.07595	0.822486	90.1308	4.39161	2.71929	49.0488	4.07987	3.96375
											1.21	50.5111		3.37226	83.6582	1.08229	0.819365	90.0533	4.42436	2.73916	48.7719	4.10592	3.97381
											1.22	50.2401		3.38144	83.5243	1.0886	0.81617	89.9758	4.45705	2.759	48.4969	4.13166	3.98367
											1.23	49.9708		3.3904	83.3943	1.09113	0.816655	89.8984	4.48966	2.77879	48.2236	4.15711	3.99334
											1.24	49.7032		3.39914	83.265	1.09303	0.822286	89.8211	4.52221	2.79854	47.9521	4.1729	4.00281
											1.25	49.4372		3.40766	83.1359	1.09486	0.828489	89.7438	4.55469	2.81826	47.6823	4.18448	4.0121
											1.26	49.173		3.41597	83.007	1.09663	0.834681	89.6667	4.5871	2.83793	47.4143	4.1958	4.0212
											1.27	48.9104		3.42408	82.8781	1.09834	0.840863	89.5896	4.61945	2.85757	47.1481	4.20686	4.03011
											1.28	48.6495		3.43197	82.7495	1.09998	0.847034	89.5126	4.65172	2.87717	46.8835	4.21632	4.03884
											1.29	48.3902		3.43967	82.621	1.10118	0.853194	89.4356	4.68393	2.89672	46.6207	4.21952	4.04739
											1.3	48.1325		3.44715	82.4926	1.09771	0.856034	89.3588	4.71607	2.91624	46.3595	4.22244	4.05577
											1.31	47.8765		3.45444	82.3582	1.10027	0.852405	89.282	4.74814	2.93572	46.1001	4.22509	4.06396
											1.32	47.622		3.46153	82.2344	1.09552	0.859131	89.2053	4.78015	2.95516	45.8423	4.22746	4.07198
											1.33	47.3692		3.46842	82.1079	1.09552	0.864637	89.1286	4.81208	2.97457	45.5862	4.22956	4.07983
											1.34	47.1179		3.47512	81.9808	1.09648	0.870602	89.0521	4.84395	2.99393	45.3317	4.2314	4.08752
											1.35	46.8682		3.48162	81.856	1.09448	0.878575	88.9756	4.87575	3.01326	45.0788	4.23297	4.09503
											1.36	46.6201		3.48794	81.7319	1.09179	0.887131	88.8992	4.90748	3.03255	44.8276	4.23428	4.10237
											1.37	46.3736		3.49407	81.608	1.09285	0.895684	88.8229	4.93915	3.0518	44.578	4.23533	4.10956
											1.38	46.1286		3.50001	81.4842	1.09097	0.904233	88.7466	4.97074	3.07101	44.33	4.23613	4.11658
											1.39	45.8851		3.50576	81.3606	1.08782	0.914899	88.6704	5.00227	3.09019	44.0836	4.23669	4.12344
											1.4	45.6431		3.51134	81.2372	1.0873	0.929795	88.5943	5.03374	3.10933	43.8388	4.23699	4.13014
											1.41	45.4029		3.51657	81.1101	1.09053	0.935677	88.5183	5.06513	3.12843	43.5955	4.23705	4.13669
											1.42	45.1662		3.51952	80.9816	1.09536	0.938408	88.4423	5.09646	3.14749	43.3538	4.23687	4.14309
											1.43	44.931		3.52227	80.8524	1.10087	0.940384	88.3664	5.12772	3.16652	43.1136	4.23646	4.14799
											1.44	44.6974		3.52484	80.726	1.10419	0.944848	88.2906	5.15891	3.18551	42.875	4.23581	4.14675
											1.45	44.4652		3.52723	80.6007	1.10727	0.95032	88.2148	5.19004	3.20446	42.6379	4.23493	4.14534
											1.46	44.2345		3.52944	80.4756	1.1103	0.955779	88.1392	5.2211	3.22338	42.4023	4.23382	4.14375
											1.47	44.0053		3.53147	80.3506	1.11327	0.960384	88.0636	5.25209	3.24226	42.1682	4.23597	4.14198
											1.48	43.7775		3.53332	80.2252	1.11678	0.962108	87.9881	5.28301	3.2611	41.9356	4.24496	4.14005
											1.49	43.5512		3.535	80.0971	1.12309	0.960957	87.9126	5.31387	3.27991	41.7045	4.25376	4.13795
											1.5	43.3263		3.53651	79.9719	1.12659	0.962548	87.8372	5.34466	3.29868	41.4749	4.26237	4.13568
											1.51	43.1028		3.53785	79.8469	1.13002	0.964118	87.7619	5.37538	3.31742	41.2467	4.27078	4.13326
											1.52	42.8807		3.53903	79.7238	1.13166	0.967401	87.6867	5.40604	3.33612	41.02	4.27901	4.13067
											1.53	42.6601		3.54003	79.6008	1.13446	0.970678	87.6115	5.43663	3.35478	40.7947	4.28705	4.12792
											1.54	42.4408		3.54088	79.478	1.14126	0.973934	87.5364	5.46715	3.37341	40.5708	4.2949	4.12502
											1.55	42.2229		3.54156	79.3554	1.14804	0.977171	87.4614	5.49761	3.392	40.3484	4.30257	4.12197
											1.56	42.0064		3.54209	79.2329	1.15481	0.980387	87.3865	5.528	3.41056	40.1192	4.3019	4.12693
											1.57	41.7913		3.54246	79.1097	1.16254	0.982599	87.3116	5.55832	3.42908	39.8905	4.30005	4.13274
											1.58	41.5776		3.54267	78.9843	1.17245	0.982595	87.2368	5.58858	3.44756	39.6631	4.29803	4.13839
											1.59	41.3651		3.54273	78.8557	1.18587	0.979043	87.1621	5.61877	3.46601	39.4371	4.29584	4.1439
											1.6	41.1541		3.54265	78.7315	1.1949	0.979841	87.0874	5.6489	3.48443	39.2125	4.29347	4.14926
											1.61	40.9443		3.54241	78.6075	1.20393	0.980611	87.0128	5.67895	3.50281	38.9892	4.29094	4.15448
											1.62	40.7359		3.54202	78.4837	1.21294	0.981353	86.9383	5.70895	3.52116	38.7674	4.28824	4.15956
											1.63	40.5288		3.5415	78.36	1.22195	0.982068	86.8638	5.73887	3.53947	38.5468	4.28152	4.16449
											1.64	40.323		3.53829	78.2365	1.23094	0.982755	86.7895	5.76873	3.55774	38.3277	4.26698	4.16929
											1.65	40.1184		3.53401	78.1131	1.23993	0.983415	86.7152	5.79853	3.57599	38.1098	4.25227	4.17395
											1.66	39.9152		3.52957	77.9899	1.2489	0.984048	86.6409	5.82825	3.59419	37.8948	4.23895	4.1769
											1.67	39.7133		3.52499	77.8668	1.25786	0.984656	86.5667	5.85792	3.61237	37.6839	4.22817	4.17702
											1.68	39.5126		3.52027	77.7428	1.26793	0.984122	86.4927	5.88751	3.63051	37.4743	4.21723	4.177
											1.69	39.3132		3.5154	77.6139	1.28306	0.978486	86.4186	5.91704	3.64861	37.266	4.20615	4.17683
											1.7	39.115		3.51039	77.4851	1.29819	0.972813	86.3447	5.94651	3.66668	37.059	4.19492	4.17652
											1.71	38.9181		3.50524	77.3564	1.31332	0.967106	86.2708	5.97591	3.68472	36.8533	4.18355	4.17752
											1.72	38.7224		3.49995	77.2334	1.32096	0.966865	86.197	6.00524	3.70272	36.6488	4.17203	4.18521
											1.73	38.5279		3.49453	77.1068	1.33168	0.962778	86.1232	6.03451	3.72069	36.4457	4.16038	4.19278
											1.74	38.3347		3.48897	76.9803	1.34236	0.958677	86.0495	6.06372	3.73863	36.2438	4.14859	4.20025
											1.75	38.1426		3.48329	76.8452	1.36177	0.946684	85.9759	6.09285	3.75653	36.0432	4.13667	4.2076
											1.76	37.9518		3.47747	76.7152	1.37619	0.941632	85.9024	6.12193	3.7744	35.8438	4.12462	4.21485
											1.77	37.7622		3.47153	76.588	1.38799	0.939142	85.8289	6.15093	3.79223	35.6457	4.11245	4.22199
											1.78	37.5737		3.46546	76.4671	1.3936	0.942784	85.7555	6.17988	3.81004	35.4488	4.10014	4.22903
											1.79	37.3864		3.45927	76.3485	1.39699	0.948588	85.6822	6.20875	3.82781	35.2532	4.08772	4.23596
											1.8	37.2003		3.45295	76.2277	1.40151	0.95197	85.6089	6.23757	3.84554	35.0587	4.07518	4.24279
											1.81	37.0154		3.44652	76.1071	1.39925	0.955328	85.5357	6.26631	3.86324	34.8655	4.06252	4.24951
											1.82	36.8316		3.43997	75.9866	1.39694	0.958664	85.4626	6.295	3.88091	34.6735	4.04974	4.25613
											1.83	36.6489		3.43331	75.8663	1.39633	0.961977	85.3895	6.32362	3.89855	34.4826	4.03686	4.26265
											1.84	36.4674		3.42653	75.7462	1.39851	0.965267	85.3165	6.35217	3.91616	34.293	4.02386	4.26907
											1.85	36.287		3.41964	75.6259	1.40097	0.968224	85.2436	6.38066	3.93373	34.1079	4.00928	4.27208
											1.86	36.1078		3.41264	75.5057	1.40965	0.971133	85.1707	6.40908	3.95127	33.9262	3.9832	4.2727
											1.87	35.9296		3.40553	75.388	1.41684	0.976275	85.0979	6.43744	3.96878	33.7456	3.95705	4.27323
											1.88	35.7526		3.39844	75.2704	1.424	0.98141	85.0252	6.46574	3.98625	33.5663	3.93083	4.27365
											1.89	35.5767		3.39381	75.1531	1.43113	0.994439	84.9526	6.49397	4.00369	33.3881	3.90454	4.27397
											1.9	35.4018		3.38908	75.0359	1.43823	1.00805	84.88	6.52214	4.0211	33.211	3.88354	4.27419
											1.91	35.2281		3.38425	74.9157	1.44839	1.01856	84.8075	6.55024	4.03848	33.0351	3.8828	4.27432
											1.92	35.0554		3.37933	74.7906	1.4637	1.02199	84.735	6.57828	4.05583	32.8602	3.88197	4.27434
											1.93	34.8838		3.37432	74.6657	1.47401	1.0185	84.6626	6.60626	4.07314	32.6866	3.88106	4.27428
											1.94	34.7133		3.36921	74.5467	1.47785	1.02076	84.5903	6.63417	4.09042	32.514	3.88006	4.27412
											1.95	34.5438		3.36402	74.4256	1.48384	1.02082	84.518	6.66202	4.10768	32.3422	3.87864	4.27419
											1.96	34.3742		3.35984	74.3006	1.49394	1.01672	84.4459	6.6898	4.12489	32.1649	3.87056	4.28076
											1.97	34.2047		3.35665	74.1758	1.50398	1.01261	84.3737	6.71752	4.14208	31.9887	3.86239	4.28725
											1.98	34.0361		3.35339	74.0531	1.51205	1.01042	84.3017	6.74518	4.15924	31.8136	3.85413	4.29365
											1.99	33.8686		3.35005	73.9364	1.51427	1.01402	84.2297	6.77277	4.17636	31.6396	3.84728	4.29997
											2	33.7021		3.34663	73.8198	1.51645	1.01761	84.1578	6.8003	4.19346	31.4676	3.85319	4.30517
											2.01	33.5366		3.34314	73.7034	1.51858	1.02119	84.0859	6.82777	4.21052	31.2985	3.86085	4.30846
											2.02	33.3721		3.33957	73.5872	1.51927	1.02394	84.0141	6.85517	4.22755	31.1305	3.86843	4.31166
											2.03	33.2086		3.33593	73.4735	1.51751	1.02754	83.9424	6.88251	4.24455	30.9636	3.87207	4.31477
											2.04	33.0461		3.33221	73.3608	1.51499	1.03305	83.8708	6.90979	4.26152	30.7977	3.87217	4.31779
											2.05	32.8845		3.32843	73.2447	1.51588	1.0389	83.7992	6.937	4.27845	30.6328	3.87219	4.32073
											2.06	32.724		3.32457	73.124	1.52156	1.03989	83.7276	6.96415	4.29536	30.4689	3.87213	4.32359
											2.07	32.5644		3.31717	73.0035	1.5272	1.04085	83.6562	6.99124	4.31223	30.3061	3.87199	4.32636
											2.08	32.4058		3.30894	72.8831	1.53279	1.0418	83.5848	7.01827	4.32908	30.1443	3.87178	4.32905
											2.09	32.2481		3.30064	72.763	1.53833	1.04272	83.5135	7.04523	4.34589	29.9835	3.8715	4.33166
											2.1	32.0914		3.29227	72.643	1.54383	1.04362	83.4422	7.07213	4.36268	29.8237	3.87114	4.32926
											2.11	31.9356		3.28383	72.5286	1.54389	1.04625	83.371	7.09897	4.37943	29.6649	3.87071	4.32655
											2.12	31.7808		3.27532	72.4174	1.5409	1.04892	83.2999	7.12574	4.39615	29.507	3.87021	4.32376
											2.13	31.6269		3.26674	72.3064	1.53789	1.05157	83.2288	7.15245	4.41285	29.3502	3.86964	4.32089
											2.14	31.4739		3.25809	72.1923	1.53805	1.05097	83.1578	7.1791	4.42951	29.1943	3.86899	4.31794
											2.15	31.3219		3.24938	72.0748	1.5418	1.04673	83.0868	7.20569	4.44614	29.0394	3.86828	4.31492
											2.16	31.1707		3.2406	71.9574	1.54552	1.04763	83.016	7.23222	4.46274	28.8855	3.86749	4.31182
											2.17	31.0205		3.23177	71.8403	1.54919	1.04852	82.9452	7.25868	4.47931	28.7325	3.86664	4.30864
											2.18	30.8712		3.22287	71.7233	1.55282	1.04937	82.8744	7.28508	4.49585	28.5804	3.86572	4.3054
											2.19	30.7227		3.21391	71.6065	1.55068	1.04803	82.8037	7.31142	4.51236	28.4293	3.86473	4.30207
											2.2	30.5752		3.20489	71.4899	1.55925	1.04596	82.7331	7.3377	4.52885	28.2792	3.86368	4.29868
											2.21	30.4285		3.19581	71.3734	1.56345	1.04389	82.6626	7.36392	4.5453	28.1299	3.86256	4.29522
											2.22	30.2828		3.18667	71.2572	1.5669	1.04181	82.5921	7.39007	4.56172	27.9816	3.85821	4.29168
											2.23	30.1378		3.17748	71.1453	1.56615	1.04389	82.5216	7.41617	4.57811	27.8342	3.84089	4.28808
											2.24	29.9938		3.16824	71.0354	1.56774	1.04777	82.4513	7.4422	4.59447	27.6878	3.82354	4.28441
											2.25	29.8506		3.15894	70.9257	1.56883	1.05382	82.381	7.46817	4.61081	27.5422	3.80615	4.28068
											2.26	29.7083		3.14959	70.8161	1.56237	1.06224	82.3108	7.49408	4.62711	27.3975	3.78873	4.27231
											2.27	29.5668		3.14019	70.7059	1.56223	1.06982	82.2406	7.51993	4.64338	27.2537	3.77128	4.26351
											2.28	29.4262		3.13074	70.5895	1.57285	1.07099	82.1705	7.54571	4.65963	27.1172	3.7602	4.24824
											2.29	29.2864		3.12124	70.4732	1.58345	1.07217	82.1004	7.57144	4.67584	26.9823	3.74979	4.23221
											2.3	29.1474		3.1117	70.3571	1.59353	1.07335	82.0305	7.5971	4.69203	26.8482	3.73934	4.21612
											2.31	29.0093		3.10211	70.2412	1.60168	1.07453	81.9605	7.62271	4.70819	26.715	3.72887	4.19997
											2.32	28.872		3.09247	70.1255	1.60979	1.07571	81.8907	7.64825	4.72431	26.5827	3.71837	4.18376
											2.33	28.7355		3.08278	70.01	1.61786	1.0769	81.8209	7.67373	4.74041	26.4512	3.70784	4.16751
											2.34	28.5998		3.07306	69.8957	1.62474	1.07923	81.7512	7.69915	4.75648	26.3206	3.69728	4.1512
											2.35	28.465		3.0635	69.7903	1.62301	1.09013	81.6815	7.72451	4.77252	26.1908	3.68669	4.13484
											2.36	28.3309		3.05482	69.685	1.62125	1.10043	81.6119	7.74981	4.78853	26.0618	3.67608	4.11842
											2.37	28.1976		3.0461	69.5799	1.61935	1.10908	81.5424	7.77505	4.80452	25.9336	3.66545	4.10196
											2.38	28.0651		3.03735	69.4749	1.6151	1.11769	81.4729	7.80023	4.82047	25.8063	3.6548	4.08546
											2.39	27.9334		3.02855	69.3702	1.61082	1.12626	81.4035	7.82535	4.8364	25.6736	3.63788	4.07514
											2.4	27.8025		3.01971	69.2655	1.60735	1.13479	81.3341	7.85041	4.85229	25.5398	3.61912	4.06661
											2.41	27.6724		3.01084	69.1611	1.6058	1.14328	81.2648	7.87541	4.86816	25.4069	3.60034	4.05803
											2.42	27.543		3.00193	69.0568	1.60424	1.15172	81.1956	7.90035	4.884	25.2747	3.58155	4.04939
											2.43	27.4144		2.99298	68.9493	1.60604	1.15673	81.1264	7.92523	4.89981	25.1434	3.56276	4.04071
											2.44	27.2866		2.984	68.8411	1.60875	1.16076	81.0573	7.95005	4.91559	25.0129	3.54396	4.03198
											2.45	27.1595		2.97499	68.7324	1.61203	1.16418	80.9883	7.97481	4.93135	24.8802	3.5222	4.02614
											2.46	27.0331		2.96595	68.6239	1.61528	1.16755	80.9193	7.99951	4.94708	24.7531	3.50528	4.01542
											2.47	26.9075		2.96038	68.519	1.61029	1.17432	80.8504	8.02415	4.96277	24.627	3.48854	4.00447
											2.48	26.7827		2.9576	68.4143	1.60434	1.18108	80.7815	8.04873	4.97844	24.5017	3.47643	3.99347
											2.49	26.6586		2.9548	68.3098	1.59838	1.18778	80.7127	8.07325	4.99408	24.3771	3.46824	3.98244
											2.5	26.5352		2.95196	68.2054	1.5924	1.19444	80.644	8.09771	5.0097	24.2533	3.46002	3.97138
											2.51	26.4097		2.95186	68.1012	1.5864	1.20106	80.5753	8.12212	5.02528	24.1303	3.45177	3.96027
											2.52	26.2839		2.95285	67.9972	1.58039	1.20763	80.5067	8.14646	5.04084	24.008	3.44348	3.94914
											2.53	26.1588		2.95381	67.8933	1.57558	1.21415	80.4382	8.17074	5.05637	23.8772	3.42596	3.94717
											2.54	26.0345		2.95474	67.7896	1.57234	1.22063	80.3697	8.19497	5.07187	23.7462	3.4074	3.94618
											2.55	25.9108		2.95563	67.686	1.56908	1.22706	80.3013	8.21914	5.08735	23.6159	3.38882	3.94513
											2.56	25.7878		2.95649	67.5827	1.5658	1.23345	80.2329	8.24325	5.10279	23.4864	3.37024	3.94403
											2.57	25.6656		2.95732	67.4794	1.5625	1.23979	80.1646	8.26729	5.11821	23.369	3.36299	3.93155
											2.58	25.5441		2.95811	67.3764	1.55917	1.24608	80.0964	8.29129	5.1336	23.2523	3.35578	3.91897
											2.59	25.4232		2.95888	67.2735	1.55583	1.25233	80.0282	8.31522	5.14897	23.1364	3.34855	3.90635
											2.6	25.3031		2.95961	67.1707	1.55246	1.25853	79.9601	8.33909	5.1643	23.0212	3.3413	3.8937
											2.61	25.1836		2.96032	67.0681	1.54908	1.26037	79.892	8.36291	5.17961	22.9067	3.33401	3.88103
											2.62	25.0648		2.96099	66.9657	1.54568	1.26194	79.824	8.38666	5.19489	22.7929	3.3267	3.86833
											2.63	24.9468		2.96163	66.8588	1.54691	1.26223	79.7561	8.41036	5.21015	22.6798	3.31937	3.85561
											2.64	24.8293		2.96225	66.7502	1.54995	1.2625	79.6882	8.434	5.22537	22.5674	3.31201	3.84287
											2.65	24.7126		2.96283	66.6418	1.55296	1.26274	79.6204	8.45759	5.24057	22.4556	3.30463	3.8301
											2.66	24.5965		2.96338	66.5336	1.55594	1.26295	79.5526	8.48111	5.25575	22.3432	3.29585	3.81868
											2.67	24.4811		2.96391	66.4255	1.55889	1.26312	79.4849	8.50458	5.27089	22.2256	3.28117	3.81312
											2.68	24.3664		2.96441	66.3176	1.56181	1.26326	79.4173	8.52799	5.28601	22.1086	3.26648	3.80752
											2.69	24.2523		2.96487	66.2099	1.56469	1.26336	79.3497	8.55134	5.3011	21.9924	3.25179	3.80189
											2.7	24.1389		2.96532	66.1024	1.56755	1.26343	79.2822	8.57463	5.31616	21.8768	3.23709	3.79623
											2.71	24.0261		2.96573	65.995	1.57038	1.26347	79.2147	8.59787	5.3312	21.7619	3.22583	3.79054
											2.72	23.9139		2.96612	65.8878	1.57318	1.26347	79.1473	8.62105	5.34621	21.6477	3.21853	3.78481
											2.73	23.8024		2.96647	65.7808	1.57595	1.26449	79.08	8.64417	5.36119	21.5341	3.2112	3.77905
											2.74	23.6915		2.96681	65.6739	1.57868	1.2724	79.0127	8.66723	5.37615	21.4212	3.20385	3.77326
											2.75	23.5813		2.96711	65.5672	1.58139	1.28026	78.9455	8.69024	5.39108	21.309	3.19647	3.76744
											2.76	23.4717		2.96739	65.4652	1.57961	1.29252	78.8783	8.71319	5.406	21.1974	3.18908	3.76159
											2.77	23.3627		2.96483	65.3651	1.57602	1.30649	78.8112	8.73608	5.42097	21.0864	3.18166	3.75571
											2.78	23.2544		2.95868	65.2651	1.57241	1.31725	78.7442	8.75892	5.43592	20.9761	3.17423	3.75108
											2.79	23.1466		2.9525	65.1653	1.56878	1.32434	78.6772	8.7817	5.45085	20.8665	3.16678	3.75188
											2.8	23.0395		2.94631	65.0618	1.56905	1.32747	78.6103	8.80442	5.46575	20.7575	3.15528	3.75264
											2.81	22.933		2.9401	64.9571	1.5706	1.32927	78.5434	8.82708	5.48062	20.6491	3.13809	3.75335
											2.82	22.8271		2.93387	64.8526	1.57211	1.33105	78.4766	8.84969	5.49546	20.5413	3.12092	3.75402
											2.83	22.7217		2.92762	64.7483	1.57358	1.33281	78.4099	8.87225	5.51028	20.4461	3.11392	3.74274
											2.84	22.617		2.92177	64.6442	1.57502	1.33455	78.3432	8.89474	5.52507	20.3602	3.10954	3.72271
											2.85	22.5129		2.91609	64.5402	1.57642	1.33627	78.2766	8.91718	5.53984	20.2749	3.10514	3.70272
											2.86	22.4094		2.91039	64.4364	1.57779	1.33797	78.21	8.93956	5.55458	20.19	3.10071	3.68277
											2.87	22.3064		2.90468	64.3328	1.57912	1.33965	78.1435	8.96189	5.56929	20.0912	3.0817	3.67741
											2.88	22.2041		2.89895	64.2294	1.58041	1.34092	78.0771	8.98416	5.58398	19.9857	3.05547	3.67928
											2.89	22.1023		2.89321	64.1261	1.58166	1.33883	78.0107	9.00638	5.59864	19.8847	3.04152	3.67721
											2.9	22.0012		2.88738	64.0231	1.58288	1.33671	77.9444	9.02854	5.61328	19.7905	3.03957	3.6688
											2.91	21.9055		2.87666	63.9202	1.58407	1.33458	77.8781	9.05064	5.62789	19.697	3.0376	3.66038
											2.92	21.8104		2.86595	63.8175	1.58521	1.33244	77.8119	9.07269	5.64247	19.604	3.0356	3.65193
											2.93	21.7158		2.85524	63.7149	1.58632	1.33028	77.7457	9.09468	5.65703	19.5116	3.03358	3.64347
											2.94	21.6218		2.84453	63.6092	1.59081	1.3247	77.6796	9.11662	5.67157	19.4197	3.03153	3.63499
											2.95	21.5283		2.83383	63.5031	1.59577	1.31636	77.6136	9.1385	5.68607	19.3284	3.02947	3.6265
											2.96	21.4354		2.82314	63.3972	1.60069	1.30754	77.5476	9.16033	5.70056	19.2377	3.02738	3.61799
											2.97	21.3429		2.81246	63.2943	1.60271	1.30158	77.4817	9.1821	5.71501	19.1403	3.01812	3.61662
											2.98	21.251		2.80178	63.1924	1.60385	1.29648	77.4158	9.20381	5.72944	19.041	3.00635	3.61772
											2.99	21.1597		2.79111	63.0907	1.60497	1.29138	77.35	9.22547	5.74385	18.9423	2.99459	3.61877
											3	21.0689		2.78045	62.9892	1.60606	1.28629	77.2843	9.24708	5.75823	18.8442	2.98284	3.61977
											3.01	20.9785		2.7698	62.8879	1.60712	1.28121	77.2186	9.26863	5.77258	18.7466	2.97111	3.62072
											3.02	20.8887		2.75916	62.7867	1.60815	1.27613	77.1529	9.29012	5.78691	18.6496	2.95939	3.62163
											3.03	20.7995		2.74852	62.6857	1.60915	1.27107	77.0874	9.31156	5.80122	18.5532	2.94769	3.62249
											3.04	20.7107		2.7379	62.5848	1.61012	1.266	77.0218	9.33295	5.81549	18.4627	2.94138	3.61791
											3.05	20.6224		2.72729	62.4842	1.61106	1.26095	76.9564	9.35428	5.82975	18.3802	2.9426	3.60578
											3.06	20.5347		2.71669	62.3837	1.61197	1.25591	76.891	9.37556	5.84397	18.2983	2.9438	3.59364
											3.07	20.4474		2.7061	62.2833	1.61286	1.25087	76.8256	9.39678	5.85818	18.2169	2.94497	3.5815
											3.08	20.3606		2.69552	62.1832	1.61371	1.24584	76.7604	9.41795	5.87235	18.136	2.94611	3.56936
											3.09	20.2744		2.68496	62.0832	1.61454	1.24082	76.6951	9.43906	5.88651	18.0555	2.94723	3.55721
											3.1	20.1886		2.6744	61.9834	1.61534	1.23581	76.63	9.46012	5.90063	17.9756	2.94832	3.5438
											3.11	20.1123		2.65487	61.8837	1.61611	1.2308	76.5648	9.48112	5.91474	17.8962	2.94939	3.52488
											3.12	20.04		2.63181	61.7843	1.61685	1.22784	76.4998	9.50208	5.92881	17.8154	2.9486	3.5078
											3.13	19.9651		2.61191	61.685	1.61756	1.22702	76.4348	9.52297	5.94287	17.7257	2.9384	3.50012
											3.14	19.8804		2.60226	61.5858	1.61825	1.22619	76.3698	9.54382	5.95689	17.6439	2.93505	3.48509
											3.15	19.8118		2.57699	61.4869	1.61891	1.22536	76.305	9.56461	5.9709	17.563	2.92352	3.46969
											3.16	19.7475		2.54794	61.3881	1.61954	1.22452	76.2401	9.58534	5.98487	17.4825	2.912	3.45431
											3.17	19.6722		2.53027	61.2894	1.62014	1.22367	76.1754	9.60602	5.99883	17.4025	2.90051	3.43893
											3.18	19.5876		2.52253	61.191	1.62072	1.22282	76.1106	9.62665	6.01275	17.323	2.88904	3.42356
											3.19	19.5034		2.5148	61.0927	1.62127	1.22197	76.046	9.64723	6.02666	17.244	2.87758	3.40821
											3.2	19.4197		2.50707	60.9945	1.62179	1.22111	75.9814	9.66775	6.04054	17.1655	2.86616	3.39286
											3.21	19.3364		2.49934	60.8966	1.62228	1.22024	75.9168	9.68822	6.05439	17.0874	2.85475	3.37752
											3.22	19.2536		2.49162	60.7988	1.62275	1.21937	75.8523	9.70863	6.06822	17.0098	2.84336	3.36219
											3.23	19.1713		2.4839	60.6966	1.62773	1.21395	75.7879	9.729	6.08202	16.9326	2.832	3.34687
											3.24	19.0894		2.47619	60.5945	1.63277	1.20845	75.7235	9.74931	6.0958	16.8544	2.82473	3.33307
											3.25	19.013		2.46348	60.4926	1.63775	1.20296	75.6592	9.76956	6.10956	16.768	2.81168	3.32853
											3.26	18.9368		2.45106	60.3909	1.64269	1.1975	75.5949	9.78977	6.12329	16.6821	2.79865	3.32578
											3.27	18.8579		2.44177	60.2891	1.6479	1.19173	75.5307	9.80992	6.137	16.5967	2.78564	3.32302
											3.28	18.7795		2.43248	60.1872	1.65337	1.18566	75.4666	9.83002	6.15068	16.5118	2.77266	3.32091
											3.29	18.7015		2.4232	60.0901	1.65403	1.18438	75.4025	9.85006	6.16434	16.4273	2.75969	3.32163
											3.3	18.6239		2.41393	59.9944	1.65361	1.18415	75.3385	9.87006	6.17797	16.3433	2.74674	3.32232
											3.31	18.5468		2.40467	59.8988	1.65315	1.18392	75.2745	9.89	6.19158	16.2637	2.73773	3.31907
											3.32	18.4701		2.39542	59.8033	1.65267	1.18369	75.2105	9.90989	6.20517	16.1853	2.72951	3.31501
											3.33	18.3938		2.38617	59.7081	1.65214	1.18347	75.1467	9.92972	6.21873	16.1074	2.7213	3.31094
											3.34	18.318		2.37694	59.613	1.65159	1.18325	75.0829	9.94951	6.23227	16.0299	2.71308	3.30686
											3.35	18.2426		2.36771	59.5164	1.65262	1.18141	75.0191	9.96924	6.24578	15.9529	2.70638	3.30276
											3.36	18.1677		2.35849	59.4202	1.65347	1.17973	74.9554	9.98892	6.25927	15.8763	2.70111	3.29865
											3.37	18.0931		2.34929	59.3258	1.65271	1.18311	74.8918	10.0085	6.27273	15.8022	2.69786	3.29249
											3.38	18.019		2.34009	59.2315	1.65193	1.18943	74.8282	10.0281	6.28617	15.7296	2.69569	3.28523
											3.39	17.9453		2.33091	59.1373	1.65112	1.19573	74.7646	10.0476	6.29959	15.6588	2.69487	3.27659
											3.4	17.872		2.32173	59.0433	1.65029	1.20199	74.7011	10.0671	6.31298	15.5908	2.69648	3.26551
											3.41	17.7991		2.31257	58.9495	1.64943	1.20823	74.6377	10.0865	6.32635	15.5168	2.69155	3.26094
											3.42	17.7257		2.30436	58.8559	1.64854	1.21444	74.5743	10.1059	6.3397	15.4432	2.68662	3.25635
											3.43	17.6524		2.29642	58.7624	1.64763	1.22061	74.511	10.1252	6.35302	15.37	2.68167	3.25175
											3.44	17.5796		2.28848	58.6691	1.64669	1.22676	74.4478	10.1445	6.36631	15.2951	2.67324	3.24926
											3.45	17.5072		2.28055	58.5759	1.64573	1.22989	74.3846	10.1637	6.37959	15.2153	2.65602	3.25203
											3.46	17.4351		2.27264	58.483	1.64475	1.23277	74.3214	10.1829	6.39284	15.136	2.63884	3.25475
											3.47	17.3635		2.26474	58.3898	1.64405	1.23532	74.2583	10.202	6.40606	15.0571	2.62171	3.25744
											3.48	17.2922		2.25684	58.2925	1.64765	1.23354	74.1953	10.2211	6.41927	14.9787	2.60461	3.26009
											3.49	17.2214		2.24896	58.1954	1.65121	1.23175	74.1323	10.2401	6.43244	14.9007	2.58756	3.2627
											3.5	17.1509		2.2411	58.0985	1.65473	1.22996	74.0694	10.259	6.4456	14.8231	2.57055	3.26528
											3.51	17.0808		2.23324	58.0017	1.65821	1.2276	74.0065	10.2779	6.45873	14.746	2.55358	3.26781
											3.52	17.0111		2.2254	57.9062	1.6606	1.22486	73.9437	10.2968	6.47184	14.6692	2.53665	3.27031
											3.53	16.9418		2.21881	57.8138	1.66275	1.22552	73.8809	10.3156	6.48492	14.5929	2.51977	3.27277
											3.54	16.8729		2.2132	57.7216	1.66497	1.22615	73.8182	10.3344	6.49798	14.5171	2.50293	3.2752
											3.55	16.8044		2.20761	57.6296	1.66717	1.22678	73.7555	10.3531	6.51102	14.4427	2.48722	3.27649
											3.56	16.7362		2.20203	57.5377	1.66936	1.22738	73.6929	10.3717	6.52404	14.3771	2.48131	3.26108
											3.57	16.6684		2.19645	57.446	1.67152	1.22796	73.6304	10.3903	6.53703	14.3183	2.48825	3.23765
											3.58	16.601		2.19089	57.3554	1.67267	1.22953	73.5679	10.4089	6.54999	14.2599	2.49515	3.21428
											3.59	16.5339		2.18534	57.2663	1.6725	1.23239	73.5055	10.4274	6.56294	14.2019	2.502	3.19097
											3.6	16.4673		2.17979	57.1773	1.67232	1.23521	73.4431	10.4459	6.57586	14.1442	2.50881	3.16772
											3.61	16.4009		2.17425	57.0885	1.67214	1.238	73.3807	10.4643	6.58876	14.0869	2.51557	3.14454
											3.62	16.335		2.16873	56.9998	1.67195	1.24076	73.3185	10.4826	6.60163	14.0299	2.52317	3.12142
											3.63	16.2694		2.16321	56.9113	1.67177	1.24412	73.2563	10.5009	6.61448	13.9733	2.53423	3.09837
											3.64	16.2043		2.15754	56.8229	1.67157	1.25055	73.1941	10.5192	6.62731	13.917	2.54523	3.07538
											3.65	16.1412		2.15031	56.7346	1.67138	1.25694	73.132	10.5374	6.64012	13.861	2.55154	3.05246
											3.66	16.0784		2.14311	56.6465	1.67118	1.26327	73.0699	10.5556	6.6529	13.804	2.54877	3.03097
											3.67	16.0159		2.13592	56.5586	1.67098	1.26842	73.0079	10.5737	6.66566	13.7427	2.54455	3.0142
											3.68	15.9538		2.12876	56.4707	1.67077	1.27133	72.946	10.5917	6.67839	13.6816	2.54547	3.00366
											3.69	15.892		2.12163	56.383	1.67056	1.27419	72.8841	10.6097	6.69111	13.6187	2.54729	2.99835
											3.7	15.8306		2.11451	56.2955	1.67035	1.27701	72.8222	10.6277	6.7038	13.5494	2.54353	2.99976
											3.71	15.7694		2.10742	56.2081	1.67014	1.27977	72.7604	10.6456	6.71646	13.4805	2.53976	3.00239
											3.72	15.7102		2.09883	56.1208	1.66992	1.2825	72.6987	10.6635	6.72911	13.412	2.53598	3.00674
											3.73	15.6561		2.08541	56.0337	1.6697	1.28517	72.637	10.6813	6.74173	13.3438	2.53178	3.01106
											3.74	15.6023		2.07205	55.9467	1.66947	1.2878	72.5754	10.6991	6.75433	13.2809	2.53219	3.01053
											3.75	15.5488		2.05874	55.8598	1.66924	1.29039	72.5138	10.7168	6.7669	13.2216	2.53479	3.0066
											3.76	15.4956		2.04548	55.7731	1.66901	1.29293	72.4523	10.7344	6.77946	13.1641	2.53699	3.00127
											3.77	15.4426		2.03228	55.6866	1.66878	1.29622	72.3908	10.7521	6.79199	13.1082	2.54041	2.99471
											3.78	15.39		2.01914	55.6001	1.66854	1.30128	72.3294	10.7696	6.80449	13.0553	2.54647	2.98548
											3.79	15.3376		2.00605	55.5138	1.6683	1.30628	72.268	10.7872	6.81698	13.0033	2.55312	2.97564
											3.8	15.2856		1.99301	55.4277	1.66806	1.30697	72.2067	10.8046	6.82944	12.9517	2.55971	2.96583
											3.81	15.2338		1.98003	55.3417	1.66782	1.30704	72.1455	10.8221	6.84188	12.9003	2.56625	2.95604
											3.82	15.1823		1.96711	55.2548	1.66854	1.30607	72.0843	10.8394	6.8543	12.8492	2.57274	2.94629
											3.83	15.131		1.95424	55.1667	1.67068	1.30363	72.0231	10.8568	6.86669	12.7984	2.57917	2.93656
											3.84	15.0801		1.94142	55.0787	1.67281	1.30113	71.962	10.874	6.87906	12.7479	2.58556	2.92687
											3.85	15.0294		1.93948	54.9908	1.67494	1.29857	71.901	10.8913	6.89141	12.6977	2.59189	2.9172
											3.86	14.9789		1.94105	54.9031	1.67707	1.29595	71.84	10.9085	6.90374	12.6478	2.59817	2.90756
											3.87	14.9288		1.94259	54.8155	1.6792	1.29326	71.7791	10.9256	6.91605	12.5982	2.6044	2.89795
											3.88	14.8789		1.94409	54.7281	1.68133	1.29051	71.7182	10.9427	6.92833	12.5488	2.61058	2.88837
											3.89	14.8293		1.94556	54.641	1.68317	1.288	71.6573	10.9597	6.94059	12.4997	2.60841	2.88775
											3.9	14.7799		1.94699	54.5567	1.68241	1.28801	71.5966	10.9767	6.95283	12.451	2.60322	2.89107
											3.91	14.7308		1.9339	54.4726	1.68165	1.28797	71.5358	10.9937	6.96504	12.4024	2.59803	2.89434
											3.92	14.679		1.92347	54.3886	1.68087	1.28788	71.4752	11.0106	6.97724	12.3542	2.59285	2.89758
											3.93	14.6195		1.92111	54.3047	1.68008	1.28774	71.4146	11.0274	6.98941	12.3063	2.58767	2.90076
											3.94	14.5594		1.92455	54.221	1.67927	1.28756	71.354	11.0442	7.00156	12.2586	2.58708	2.90391
											3.95	14.4996		1.93562	54.1374	1.67845	1.28733	71.2935	11.061	7.01368	12.2096	2.5913	2.90854
											3.96	14.4402		1.94663	54.054	1.67762	1.28705	71.233	11.0777	7.02579	12.1605	2.59497	2.91362
											3.97	14.381		1.95756	53.9707	1.67678	1.28672	71.1726	11.0944	7.03787	12.1096	2.59659	2.9185
											3.98	14.3222		1.96842	53.8876	1.67593	1.28648	71.1122	11.111	7.04993	12.0548	2.59406	2.91459
											3.99	14.2637		1.97679	53.8046	1.67506	1.28757	71.0519	11.1276	7.06197	12.0004	2.59151	2.91068
											4	14.2054		1.97273	53.7217	1.67418	1.28861	70.9917	11.1441	7.07398	11.9463	2.58895	2.90677
											4.01	14.1475		1.96869	53.639	1.67329	1.2896	70.9315	11.1606	7.08598	11.8924	2.58639	2.90285
											4.02	14.0899		1.96465	53.5565	1.67239	1.29055	70.8713	11.177	7.09795	11.8389	2.58382	2.89893
											4.03	14.0325		1.96062	53.4741	1.67147	1.29146	70.8112	11.1934	7.1099	11.7856	2.57278	2.89501
											4.04	13.9755		1.9566	53.3918	1.67055	1.29232	70.7512	11.2097	7.12183	11.7327	2.55399	2.89108
											4.05	13.9187		1.95258	53.3067	1.67253	1.29021	70.6912	11.226	7.13374	11.6863	2.5416	2.88084
											4.06	13.8622		1.94857	53.221	1.67535	1.28721	70.6312	11.2423	7.14562	11.6409	2.5299	2.87
											4.07	13.8061		1.94457	53.1354	1.67814	1.28419	70.5714	11.2585	7.15748	11.5957	2.51826	2.8592
											4.08	13.7502		1.94057	53.0499	1.6809	1.28114	70.5115	11.2746	7.16933	11.5507	2.50667	2.84842
											4.09	13.6946		1.93658	52.9647	1.68363	1.27807	70.4517	11.2907	7.18115	11.506	2.5001	2.83768
											4.1	13.6393		1.9326	52.8796	1.68633	1.27497	70.392	11.3068	7.19294	11.4615	2.50073	2.82697
											4.11	13.5842		1.92863	52.7946	1.68899	1.27186	70.3323	11.3228	7.20472	11.4173	2.50132	2.81629
											4.12	13.5295		1.92466	52.7098	1.69162	1.26871	70.2727	11.3388	7.21647	11.3734	2.5019	2.80565
											4.13	13.475		1.9207	52.6252	1.69422	1.26555	70.2131	11.3547	7.22821	11.3297	2.50245	2.79504
											4.14	13.4208		1.91675	52.5407	1.6964	1.26236	70.1536	11.3706	7.23992	11.2862	2.50297	2.78446
											4.15	13.3669		1.91281	52.4564	1.69522	1.25915	70.0941	11.3864	7.25161	11.2429	2.50346	2.77392
											4.16	13.3132		1.90887	52.3723	1.69403	1.25592	70.0347	11.4022	7.26328	11.2	2.50393	2.75799
											4.17	13.2599		1.90495	52.2883	1.6945	1.25267	69.9753	11.4179	7.27492	11.1572	2.50438	2.74206
											4.18	13.2068		1.90103	52.2045	1.69532	1.25074	69.916	11.4336	7.28655	11.1147	2.5048	2.72618
											4.19	13.1539		1.89711	52.1208	1.69612	1.24914	69.8567	11.4493	7.29815	11.0724	2.50526	2.71036
											4.2	13.1072		1.88739	52.0367	1.69755	1.24687	69.7975	11.4649	7.30973	11.0271	2.5042	2.69779
											4.21	13.0673		1.8711	51.9508	1.70083	1.24269	69.7383	11.4804	7.32129	10.9756	2.49659	2.6918
											4.22	13.0276		1.85487	51.8666	1.70264	1.23994	69.6792	11.4959	7.33283	10.9243	2.48899	2.68581
											4.23	12.9796		1.8466	51.7853	1.70161	1.23997	69.6201	11.5114	7.34435	10.883	2.49109	2.67015
											4.24	12.9286		1.84098	51.7042	1.7006	1.23994	69.5611	11.5268	7.35585	10.8429	2.49283	2.65359
											4.25	12.8779		1.83536	51.6232	1.69958	1.23985	69.5022	11.5422	7.36732	10.803	2.49397	2.63709
											4.26	12.8275		1.83008	51.5424	1.69857	1.23972	69.4433	11.5576	7.37878	10.7633	2.49508	2.62066
											4.27	12.7773		1.82814	51.4617	1.69757	1.23952	69.3844	11.5728	7.39021	10.7238	2.49617	2.60429
											4.28	12.7294		1.82451	51.3811	1.69657	1.23927	69.3256	11.5881	7.40162	10.6845	2.49722	2.58799
											4.29	12.6836		1.81903	51.3007	1.69557	1.23897	69.2668	11.6033	7.41301	10.6454	2.49825	2.57174
											4.3	12.6381		1.81355	51.2204	1.69458	1.23861	69.2081	11.6185	7.42438	10.6065	2.49924	2.55557
											4.31	12.5928		1.80808	51.1403	1.6936	1.2382	69.1494	11.6336	7.43573	10.5679	2.50022	2.53945
											4.32	12.5478		1.80262	51.0603	1.69715	1.23774	69.0908	11.6486	7.44706	10.5294	2.50116	2.52341
											4.33	12.5029		1.79718	50.9831	1.69839	1.2399	69.0323	11.6637	7.45836	10.4912	2.50208	2.50742
											4.34	12.4584		1.79265	50.9065	1.69917	1.24244	68.9738	11.6786	7.46965	10.4531	2.50297	2.4915
											4.35	12.414		1.78679	50.8276	1.7023	1.24257	68.9153	11.6936	7.48091	10.4056	2.49411	2.48536
											4.36	12.3699		1.78095	50.7489	1.70548	1.24259	68.8569	11.7085	7.49216	10.3551	2.48216	2.48235
											4.37	12.3258		1.77523	50.6703	1.70865	1.24256	68.7986	11.7233	7.50338	10.305	2.47026	2.47933
											4.38	12.2786		1.77301	50.5918	1.71181	1.24247	68.7402	11.7381	7.51458	10.2551	2.45839	2.47631
											4.39	12.2315		1.7708	50.5134	1.71496	1.24233	68.682	11.7529	7.52576	10.2054	2.44657	2.47523
											4.4	12.1847		1.76859	50.4352	1.71419	1.24213	68.6238	11.7676	7.53692	10.1561	2.43479	2.47464
											4.41	12.1439		1.76063	50.3571	1.71237	1.24188	68.5656	11.7823	7.54806	10.1069	2.42305	2.47404
											4.42	12.1105		1.74556	50.2792	1.71056	1.24157	68.5075	11.7969	7.55918	10.0606	2.41387	2.47091
											4.43	12.0772		1.73059	50.2013	1.70875	1.24121	68.4495	11.8115	7.57027	10.0193	2.40953	2.46297
											4.44	12.044		1.71571	50.1237	1.70695	1.24079	68.3915	11.826	7.58135	9.97827	2.4052	2.45505
											4.45	12.0071		1.70476	50.0461	1.70874	1.24032	68.3335	11.8405	7.5924	9.93743	2.40087	2.44715
											4.46	11.9659		1.69838	49.9687	1.71161	1.23979	68.2756	11.855	7.60344	9.89681	2.39655	2.43928
											4.47	11.9249		1.69203	49.8914	1.71299	1.23921	68.2178	11.8694	7.61445	9.85789	2.39373	2.42994
											4.48	11.8841		1.6857	49.8142	1.71436	1.23857	68.16	11.8838	7.62545	9.82762	2.39934	2.4122
											4.49	11.8436		1.67939	49.7372	1.71572	1.23789	68.1022	11.8981	7.63642	9.79752	2.4049	2.39452
											4.5	11.8032		1.6731	49.6603	1.71706	1.23715	68.0445	11.9124	7.64737	9.76758	2.41043	2.37693
											4.51	11.763		1.66684	49.5835	1.71838	1.23635	67.9868	11.9266	7.6583	9.73779	2.41591	2.3594
											4.52	11.723		1.66061	49.5069	1.71589	1.2355	67.9292	11.9408	7.66922	9.70817	2.42134	2.34195
											4.53	11.6833		1.65439	49.4304	1.71224	1.2346	67.8717	11.955	7.68011	9.67871	2.42674	2.32457
											4.54	11.6437		1.6482	49.354	1.70859	1.23365	67.8142	11.9691	7.69098	9.64941	2.43209	2.30727
											4.55	11.6043		1.64203	49.2778	1.70494	1.23264	67.7567	11.9832	7.70183	9.62027	2.44013	2.29003
											4.56	11.5652		1.63589	49.2017	1.70127	1.23158	67.6993	11.9972	7.71265	9.59128	2.44991	2.27287
											4.57	11.5262		1.62977	49.1257	1.6976	1.23047	67.642	12.0112	7.72346	9.56244	2.45962	2.25578
											4.58	11.4857		1.62544	49.0498	1.69393	1.22931	67.5846	12.0251	7.73425	9.53103	2.46652	2.2415
											4.59	11.4427		1.62376	48.9741	1.69262	1.2281	67.5274	12.039	7.74502	9.49344	2.46703	2.23362
											4.6	11.3999		1.62209	48.8985	1.69466	1.22683	67.4702	12.0529	7.75577	9.45604	2.4675	2.22578
											4.61	11.3573		1.62042	48.823	1.69668	1.22551	67.413	12.0667	7.7665	9.41883	2.46795	2.21796
											4.62	11.315		1.61989	48.7477	1.69869	1.22414	67.3558	12.0804	7.77727	9.37995	2.46651	2.21204
											4.63	11.2729		1.61971	48.6725	1.70068	1.22272	67.2984	12.0937	7.78835	9.33611	2.45989	2.2151
											4.64	11.2309		1.61953	48.5974	1.70266	1.22125	67.241	12.107	7.79941	9.29249	2.45328	2.21814
											4.65	11.1892		1.61935	48.5224	1.70462	1.21973	67.1836	12.1203	7.81044	9.2491	2.44668	2.22116
											4.66	11.1477		1.61917	48.4476	1.70656	1.21815	67.1263	12.1335	7.82146	9.20592	2.44008	2.22416
											4.67	11.1064		1.61898	48.3729	1.70849	1.21653	67.0691	12.1467	7.83245	9.16296	2.43349	2.22715
											4.68	11.0653		1.6188	48.2983	1.71041	1.21569	67.0119	12.1598	7.84343	9.12023	2.42692	2.23011
											4.69	11.0244		1.61861	48.2239	1.71231	1.21615	66.9547	12.1729	7.85438	9.0777	2.42034	2.23305
											4.7	10.9837		1.61842	48.1496	1.71419	1.21658	66.8976	12.186	7.86532	9.0354	2.41378	2.23598
											4.71	10.9432		1.61822	48.0754	1.71606	1.21698	66.8405	12.199	7.87623	8.99331	2.40723	2.23888
											4.72	10.9029		1.61802	48.0013	1.71792	1.21736	66.7835	12.212	7.88712	8.95143	2.40068	2.24176
											4.73	10.8628		1.61783	47.9273	1.71976	1.2177	66.7266	12.2249	7.898	8.90976	2.39156	2.24463
											4.74	10.8254		1.6151	47.8535	1.72158	1.21433	66.6697	12.2378	7.90885	8.86831	2.38226	2.24747
											4.75	10.7884		1.61217	47.7798	1.72339	1.20969	66.6128	12.2506	7.91969	8.82706	2.37299	2.2503
											4.76	10.7516		1.60924	47.7063	1.72518	1.20503	66.556	12.2634	7.9305	8.78603	2.36374	2.2531
											4.77	10.715		1.60632	47.6328	1.72696	1.20035	66.4992	12.2762	7.94129	8.7452	2.35451	2.25589
											4.78	10.6786		1.6034	47.5595	1.72873	1.19565	66.4425	12.2889	7.95206	8.70458	2.34531	2.25866
											4.79	10.6423		1.60049	47.4863	1.73048	1.19094	66.3858	12.3016	7.96282	8.66572	2.33769	2.25985
											4.8	10.6063		1.59759	47.4133	1.73221	1.1862	66.3292	12.3143	7.97355	8.63014	2.33316	2.25795
											4.81	10.5704		1.59469	47.3403	1.73393	1.18144	66.2727	12.3269	7.98426	8.59473	2.32864	2.25605
											4.82	10.5347		1.59179	47.2675	1.73564	1.17667	66.2161	12.3394	7.99496	8.55951	2.32412	2.25415
											4.83	10.4992		1.58891	47.1948	1.73733	1.17187	66.1597	12.352	8.00563	8.52448	2.3196	2.25226
											4.84	10.4638		1.58602	47.1222	1.739	1.16706	66.1032	12.3644	8.01628	8.48962	2.31509	2.25036
											4.85	10.4287		1.58314	47.052	1.73847	1.16443	66.0469	12.3769	8.02691	8.45494	2.31058	2.24847
											4.86	10.3937		1.58027	46.9823	1.73745	1.16225	65.9905	12.3893	8.03753	8.42043	2.30608	2.24657
											4.87	10.3589		1.5774	46.9128	1.73642	1.16004	65.9343	12.4016	8.04812	8.38611	2.30158	2.24468
											4.88	10.3242		1.57602	46.8434	1.73537	1.15782	65.878	12.414	8.05869	8.35196	2.29709	2.24279
											4.89	10.2898		1.57541	46.7732	1.73523	1.15568	65.8218	12.4263	8.06925	8.31798	2.29259	2.2409
											4.9	10.2583		1.57204	46.7031	1.7351	1.16027	65.7657	12.4385	8.07978	8.28418	2.28811	2.23901
											4.91	10.228		1.56977	46.6331	1.73496	1.16484	65.7096	12.4507	8.0903	8.25055	2.28362	2.23712
											4.92	10.1979		1.56759	46.5632	1.7348	1.16939	65.6536	12.4629	8.10079	8.21709	2.27914	2.23523
											4.93	10.1679		1.56436	46.4928	1.73529	1.17328	65.5976	12.475	8.11126	8.1838	2.27467	2.23334
											4.94	10.1381		1.55792	46.4216	1.73672	1.1762	65.5417	12.4871	8.12172	8.15068	2.2702	2.23146
											4.95	10.1085		1.55149	46.3504	1.73813	1.17911	65.4858	12.4991	8.13215	8.11774	2.26573	2.22957
											4.96	10.079		1.54508	46.2795	1.73952	1.182	65.4299	12.5111	8.14257	8.08495	2.26127	2.22769
											4.97	10.0496		1.54511	46.2086	1.74089	1.18489	65.3741	12.5231	8.15297	8.05234	2.25682	2.2258
											4.98	10.0204		1.54686	46.1378	1.74225	1.18776	65.3184	12.535	8.16334	8.01989	2.25237	2.22392
											4.99	9.99141		1.54833	46.0672	1.74359	1.19062	65.2627	12.5469	8.1737	7.9876	2.24749	2.22598
											5	9.96252		1.54977	45.9967	1.74491	1.19347	65.207	12.5588	8.18404	7.95548	2.24113	2.22805
											5.01	9.93377		1.54786	45.9264	1.74622	1.19631	65.1514	12.5706	8.19435	7.92352	2.2342	2.2301
											5.02	9.90518		1.54565	45.8561	1.74788	1.19914	65.0959	12.5823	8.20465	7.89173	2.22728	2.23213
											5.03	9.87673		1.54344	45.786	1.74964	1.20196	65.0403	12.5941	8.21493	7.86009	2.22039	2.23413
											5.04	9.84843		1.54122	45.716	1.75138	1.20477	64.9849	12.6058	8.22519	7.82862	2.21351	2.23611
											5.05	9.82027		1.53669	45.6461	1.75311	1.20757	64.9295	12.6174	8.23543	7.7973	2.20665	2.23807
											5.06	9.79226		1.52955	45.5764	1.75482	1.21035	64.8741	12.629	8.24565	7.76614	2.19981	2.24
											5.07	9.76439		1.52242	45.5067	1.75195	1.21313	64.8188	12.6406	8.25585	7.73514	2.19298	2.24192
											5.08	9.73666		1.51531	45.4372	1.74768	1.21589	64.7635	12.6522	8.26603	7.70429	2.18618	2.24311
											5.09	9.70907		1.50821	45.3678	1.74341	1.21865	64.7083	12.6637	8.27619	7.67361	2.17939	2.23598
											5.1	9.68163		1.50113	45.2985	1.73914	1.22139	64.6531	12.6751	8.28634	7.64307	2.17263	2.22887
											5.11	9.65432		1.49406	45.2294	1.73487	1.22218	64.598	12.6865	8.29646	7.61269	2.16588	2.22559
											5.12	9.62715		1.48701	45.1604	1.7306	1.21775	64.5429	12.6979	8.30657	7.58246	2.15915	2.22868
											5.13	9.59775		1.48234	45.0914	1.72633	1.20602	64.4879	12.7093	8.31665	7.55238	2.15243	2.23175
											5.14	9.56864		1.47753	45.0227	1.72205	1.19044	64.4329	12.7206	8.32672	7.52459	2.14787	2.23265
											5.15	9.542		1.47041	44.954	1.71953	1.17485	64.3779	12.7319	8.33676	7.49991	2.14629	2.23056
											5.16	9.51549		1.4633	44.8854	1.72002	1.15927	64.323	12.7431	8.34679	7.47536	2.14471	2.22846
											5.17	9.48912		1.45577	44.817	1.72051	1.14368	64.2682	12.7543	8.3568	7.45094	2.14313	2.22636
											5.18	9.46288		1.44771	44.7487	1.72097	1.13564	64.2134	12.7654	8.36679	7.42664	2.14154	2.22713
											5.19	9.43676		1.43968	44.6805	1.72143	1.13151	64.1586	12.7766	8.37676	7.40246	2.13994	2.22867
											5.2	9.40808		1.43436	44.6124	1.72187	1.12737	64.1039	12.7876	8.38671	7.37841	2.13834	2.23018
											5.21	9.37609		1.43251	44.5445	1.72229	1.1232	64.0493	12.7987	8.39664	7.35447	2.13674	2.23167
											5.22	9.34425		1.43067	44.4792	1.72016	1.1175	63.9947	12.8097	8.40655	7.33253	2.137	2.22638
											5.23	9.31256		1.43394	44.4159	1.71618	1.10716	63.9401	12.8207	8.41645	7.31311	2.14145	2.21603
											5.24	9.28101		1.43832	44.3527	1.71216	1.09683	63.8856	12.8316	8.42632	7.29377	2.14839	2.20573
											5.25	9.24962		1.44266	44.2896	1.70812	1.08652	63.8311	12.8425	8.43618	7.27451	2.15527	2.19547
											5.26	9.21837		1.44696	44.2267	1.70404	1.08497	63.7767	12.8533	8.44602	7.25534	2.16209	2.18526
											5.27	9.18727		1.45122	44.1639	1.69994	1.08431	63.7223	12.8642	8.45583	7.23626	2.16885	2.17509
											5.28	9.15632		1.45545	44.1012	1.69581	1.08365	63.668	12.8749	8.46563	7.21725	2.17554	2.16497
											5.29	9.12551		1.45963	44.0387	1.69165	1.08442	63.6137	12.8857	8.47541	7.19833	2.18217	2.1549
											5.3	9.09485		1.46378	43.9763	1.68746	1.08917	63.5594	12.8964	8.48517	7.17948	2.18874	2.14488
											5.31	9.06433		1.4679	43.9118	1.68551	1.09167	63.5052	12.9071	8.49492	7.16072	2.19525	2.1341
											5.32	9.03396		1.47197	43.8437	1.68715	1.09056	63.4511	12.9177	8.50464	7.14204	2.20169	2.11922
											5.33	9.00373		1.47601	43.7758	1.68879	1.08945	63.397	12.9283	8.51435	7.12344	2.20808	2.1044
											5.34	8.97384		1.47981	43.708	1.69041	1.08869	63.343	12.9389	8.52403	7.10492	2.2144	2.09203
											5.35	8.94497		1.47946	43.6403	1.69202	1.0895	63.2889	12.9494	8.5337	7.08647	2.22066	2.08083
											5.36	8.91624		1.47788	43.5728	1.69361	1.09031	63.235	12.9599	8.54335	7.06811	2.22686	2.06969
											5.37	8.88764		1.4763	43.5053	1.69519	1.09111	63.1811	12.9703	8.55298	7.05048	2.23366	2.05795
											5.38	8.85917		1.47471	43.438	1.69676	1.0919	63.1272	12.9808	8.56259	7.03457	2.24206	2.04462
											5.39	8.83084		1.47785	43.3708	1.69832	1.0927	63.0734	12.9911	8.57218	7.01874	2.25038	2.03135
											5.4	8.80263		1.48401	43.3036	1.69986	1.09348	63.0196	13.0015	8.58176	7.00297	2.25863	2.01815
											5.41	8.77456		1.49011	43.2366	1.70139	1.09426	62.9659	13.0118	8.59131	6.98727	2.26682	2.00501
											5.42	8.74662		1.49616	43.1698	1.70291	1.09504	62.9122	13.022	8.60085	6.97163	2.27493	1.99195
											5.43	8.71881		1.50215	43.103	1.70442	1.09582	62.8586	13.0323	8.61037	6.95605	2.28298	1.97894
											5.44	8.69113		1.50807	43.0363	1.70591	1.09659	62.805	13.0425	8.61987	6.94054	2.29011	1.96601
											5.45	8.66357		1.51394	42.9698	1.7074	1.09735	62.7514	13.0526	8.62935	6.9251	2.2943	1.95314
											5.46	8.63614		1.51976	42.9034	1.70887	1.09811	62.6979	13.0628	8.63881	6.90971	2.29846	1.94033
											5.47	8.60884		1.52237	42.8378	1.70959	1.09961	62.6445	13.0729	8.64825	6.89439	2.30256	1.92759
											5.48	8.58167		1.5242	42.7752	1.70746	1.10393	62.5911	13.0829	8.65768	6.87918	2.30667	1.91487
											5.49	8.55462		1.526	42.7127	1.7053	1.10827	62.5377	13.0929	8.66709	6.86574	2.31244	1.90051
											5.5	8.5277		1.52776	42.6503	1.70312	1.11261	62.4844	13.1029	8.67648	6.85265	2.31847	1.88591
											5.51	8.5009		1.52948	42.588	1.70091	1.11363	62.4311	13.1129	8.68585	6.83961	2.32443	1.87139
											5.52	8.47791		1.52748	42.5259	1.69868	1.11386	62.3779	13.1228	8.6952	6.82662	2.33034	1.85695
											5.53	8.45618		1.52431	42.4639	1.69642	1.11409	62.3247	13.1326	8.70453	6.81368	2.3362	1.84259
											5.54	8.43454		1.52113	42.4021	1.69413	1.11431	62.2716	13.1425	8.71385	6.80078	2.342	1.8283
											5.55	8.41299		1.51795	42.3403	1.69181	1.11453	62.2185	13.1523	8.72315	6.78793	2.34753	1.81409
											5.56	8.39154		1.51253	42.2787	1.68947	1.11475	62.1654	13.1621	8.73242	6.77513	2.35238	1.79995
											5.57	8.37018		1.50539	42.2172	1.6871	1.11496	62.1125	13.1718	8.74169	6.75874	2.35355	1.78952
											5.58	8.34891		1.49829	42.1558	1.68471	1.11516	62.0595	13.1815	8.75093	6.73625	2.34852	1.78531
											5.59	8.32773		1.49121	42.0946	1.68229	1.11537	62.0066	13.1912	8.76015	6.71387	2.3435	1.78111
											5.6	8.30664		1.48416	42.0335	1.67985	1.11557	61.9537	13.2008	8.76936	6.6916	2.33849	1.77692
											5.61	8.28505		1.47773	41.9725	1.67738	1.11577	61.9009	13.2104	8.77855	6.66943	2.33274	1.77274
											5.62	8.25954		1.47533	41.9116	1.67488	1.11596	61.8481	13.2199	8.78772	6.64736	2.32667	1.76858
											5.63	8.23415		1.47156	41.8509	1.67236	1.11639	61.7954	13.2295	8.79687	6.6254	2.32062	1.76444
											5.64	8.20887		1.46696	41.7903	1.66981	1.11911	61.7427	13.239	8.806	6.60354	2.31459	1.7603
											5.65	8.18371		1.46237	41.7298	1.66724	1.11952	61.6901	13.2484	8.81512	6.58178	2.30857	1.75618
											5.66	8.15866		1.4578	41.6694	1.66464	1.11918	61.6375	13.2578	8.82421	6.56013	2.30257	1.75208
											5.67	8.13372		1.45324	41.6091	1.66202	1.11884	61.585	13.2672	8.83329	6.53857	2.29658	1.74798
											5.68	8.10889		1.44869	41.549	1.65937	1.11851	61.5325	13.2766	8.84236	6.51712	2.29034	1.7439
											5.69	8.08418		1.44416	41.489	1.6567	1.1182	61.48	13.2859	8.8514	6.49577	2.28399	1.73983
											5.7	8.05958		1.43964	41.4304	1.65268	1.11921	61.4276	13.2952	8.86042	6.47452	2.27767	1.73578
											5.71	8.03508		1.43514	41.373	1.64765	1.12123	61.3753	13.3044	8.86943	6.45336	2.27135	1.73174
											5.72	8.0107		1.43064	41.3156	1.6426	1.12325	61.3229	13.3136	8.87842	6.4323	2.26506	1.72771
											5.73	7.98643		1.42617	41.2584	1.63753	1.12527	61.2707	13.3228	8.88739	6.41135	2.25878	1.72369
											5.74	7.96226		1.4217	41.1991	1.63536	1.12514	61.2184	13.332	8.89635	6.39491	2.25693	1.71527
											5.75	7.93821		1.41725	41.1375	1.63635	1.12256	61.1662	13.3411	8.90528	6.38104	2.25758	1.70437
											5.76	7.91426		1.41281	41.076	1.63734	1.11998	61.1141	13.3502	8.9142	6.36724	2.25821	1.69353
											5.77	7.89041		1.40839	41.0149	1.63808	1.11765	61.062	13.3592	8.9231	6.3535	2.25882	1.68274
											5.78	7.86668		1.40398	40.9642	1.62842	1.12569	61.01	13.3682	8.93198	6.33981	2.2594	1.672
											5.79	7.84305		1.40129	40.915	1.61742	1.13507	60.958	13.3772	8.94085	6.32617	2.25997	1.66131
											5.8	7.81952		1.39962	40.8635	1.60883	1.14203	60.906	13.3861	8.9497	6.3126	2.26051	1.65067
											5.81	7.7961		1.39795	40.8038	1.60848	1.14074	60.8541	13.395	8.95853	6.29908	2.26093	1.64007
											5.82	7.77279		1.39628	40.7443	1.60812	1.13946	60.8022	13.4039	8.96734	6.28561	2.26389	1.62953
											5.83	7.74957		1.39461	40.6848	1.60779	1.13814	60.7504	13.4127	8.97613	6.2722	2.26683	1.61904
											5.84	7.72646		1.39295	40.6249	1.60798	1.13629	60.6986	13.4216	8.98491	6.25885	2.26973	1.6086
											5.85	7.70345		1.39129	40.5651	1.60816	1.13445	60.6469	13.4303	8.99367	6.24555	2.27261	1.60057
											5.86	7.68055		1.38964	40.5054	1.60831	1.13262	60.5952	13.4391	9.00241	6.2323	2.27412	1.5929
											5.87	7.65774		1.38798	40.4459	1.60846	1.13079	60.5435	13.4478	9.01113	6.2191	2.27372	1.58528
											5.88	7.63504		1.38634	40.3864	1.60858	1.12897	60.4919	13.4564	9.01984	6.20596	2.27331	1.57768
											5.89	7.61243		1.38469	40.3281	1.60773	1.12812	60.4403	13.4651	9.02853	6.19288	2.27288	1.57013
											5.9	7.58993		1.38304	40.2695	1.60721	1.12889	60.3888	13.4737	9.0372	6.17984	2.27244	1.56261
											5.91	7.56752		1.3814	40.2118	1.60582	1.13092	60.3373	13.4823	9.04585	6.16686	2.27199	1.55513
											5.92	7.54521		1.37977	40.1551	1.60361	1.13375	60.2859	13.4908	9.05449	6.15393	2.27153	1.54769
											5.93	7.523		1.37813	40.0958	1.60414	1.13384	60.2345	13.4993	9.0631	6.14105	2.27106	1.54028
											5.94	7.50089		1.3765	40.0351	1.60612	1.13248	60.1832	13.5078	9.07171	6.12822	2.27057	1.53291
											5.95	7.47887		1.37487	39.9745	1.60808	1.13113	60.1319	13.5162	9.08029	6.11544	2.27007	1.52557
											5.96	7.45695		1.37325	39.914	1.61004	1.12977	60.0806	13.5247	9.08885	6.10271	2.26956	1.51827
											5.97	7.43513		1.37162	39.8536	1.61199	1.12841	60.0294	13.533	9.0974	6.09003	2.26903	1.51101
											5.98	7.4134		1.37001	39.7934	1.61347	1.12706	59.9783	13.5414	9.10593	6.0774	2.2685	1.50378
											5.99	7.39177		1.36839	39.7332	1.61224	1.1257	59.9271	13.5497	9.11445	6.06483	2.26795	1.49658
											6	7.37023		1.36514	39.6731	1.61101	1.12435	59.8761	13.558	9.12295	6.0523	2.26739	1.48942
											6.01	7.34878		1.36165	39.6132	1.60978	1.12319	59.825	13.5662	9.13143	6.03981	2.26692	1.4823
											6.02	7.32743		1.35817	39.5533	1.60854	1.12489	59.774	13.5744	9.13989	6.02738	2.267	1.47521
											6.03	7.30617		1.3547	39.4936	1.60729	1.12659	59.7231	13.5826	9.14833	6.015	2.26707	1.46816
											6.04	7.285		1.35124	39.4343	1.60566	1.12867	59.6722	13.5908	9.15676	6.00266	2.26711	1.46114
											6.05	7.26392		1.34779	39.3759	1.60326	1.13153	59.6213	13.5989	9.16517	5.99037	2.26714	1.45415
											6.06	7.24294		1.34435	39.3176	1.60085	1.13439	59.5705	13.607	9.17356	5.97812	2.26714	1.4472
											6.07	7.22204		1.34092	39.2594	1.59844	1.13725	59.5197	13.615	9.18194	5.96593	2.26713	1.44029
											6.08	7.20124		1.33751	39.2013	1.59602	1.14012	59.469	13.623	9.1903	5.95378	2.2671	1.43341
											6.09	7.18052		1.3341	39.1434	1.5936	1.143	59.4183	13.631	9.19864	5.94097	2.26635	1.42718
											6.1	7.1599		1.33071	39.0855	1.59117	1.14588	59.3677	13.639	9.20697	5.926	2.26337	1.42029
											6.11	7.13936		1.32732	39.0277	1.58873	1.14877	59.3171	13.6469	9.21527	5.91108	2.26038	1.41344
											6.12	7.11803		1.32482	38.9701	1.58629	1.15166	59.2665	13.6548	9.22356	5.89623	2.25739	1.40661
											6.13	7.09637		1.32277	38.9125	1.58384	1.15456	59.216	13.6627	9.23184	5.88144	2.2544	1.39982
											6.14	7.0748		1.32071	38.855	1.58139	1.15746	59.1655	13.6705	9.24009	5.86671	2.25141	1.39306
											6.15	7.05332		1.31866	38.7977	1.57893	1.16037	59.1151	13.6783	9.24833	5.85186	2.24824	1.3865
											6.16	7.03193		1.31661	38.7404	1.57646	1.16329	59.0647	13.6861	9.25656	5.83611	2.24411	1.38093
											6.17	7.01064		1.31457	38.6833	1.57399	1.1662	59.0144	13.6938	9.26476	5.82024	2.23979	1.37558
											6.18	6.98944		1.31253	38.6263	1.57152	1.16913	58.9641	13.7015	9.27295	5.80444	2.23549	1.37024
											6.19	6.96833		1.3105	38.5693	1.56904	1.17206	58.9138	13.7092	9.28112	5.78871	2.23119	1.36493
											6.2	6.94731		1.30847	38.5125	1.56655	1.17142	58.8636	13.7168	9.28928	5.77305	2.2269	1.35963
											6.21	6.92638		1.31037	38.4557	1.56406	1.1704	58.8135	13.7244	9.29742	5.75745	2.22261	1.35436
											6.22	6.90554		1.31318	38.3991	1.56156	1.16996	58.7633	13.732	9.30554	5.74192	2.21834	1.3491
											6.23	6.88479		1.31596	38.3426	1.55876	1.16942	58.7133	13.7396	9.31364	5.72646	2.21408	1.34386
											6.24	6.86413		1.31874	38.2861	1.55763	1.16888	58.6632	13.7471	9.32173	5.71107	2.20982	1.33864
											6.25	6.84356		1.3215	38.2298	1.5565	1.16693	58.6132	13.7546	9.3298	5.69574	2.20557	1.33344
											6.26	6.82307		1.32425	38.1736	1.55535	1.16416	58.5633	13.762	9.33785	5.68048	2.20133	1.32826
											6.27	6.80268		1.32698	38.1175	1.55418	1.16047	58.5134	13.7694	9.34589	5.66528	2.1971	1.3231
											6.28	6.78237		1.3297	38.0614	1.5519	1.15537	58.4635	13.7768	9.35391	5.65015	2.19288	1.31796
											6.29	6.76214		1.33241	38.0055	1.5495	1.15027	58.4137	13.7842	9.36192	5.63509	2.18867	1.31283
											6.3	6.74201		1.33234	37.9497	1.54709	1.14517	58.3639	13.7915	9.3699	5.62009	2.18446	1.30773
											6.31	6.72196		1.3314	37.894	1.54467	1.14007	58.3142	13.7988	9.37787	5.60515	2.18027	1.30553
											6.32	6.70199		1.33046	37.8384	1.54225	1.13496	58.2645	13.8061	9.38583	5.58847	2.17427	1.30559
											6.33	6.68211		1.32952	37.7828	1.53981	1.12985	58.2148	13.8133	9.39376	5.57047	2.17011	1.30702
											6.34	6.66232		1.32857	37.7274	1.53736	1.12474	58.1652	13.8205	9.40168	5.55108	2.1647	1.30991
											6.35	6.6426		1.32763	37.6721	1.53491	1.11962	58.1156	13.8277	9.40959	5.53177	2.1593	1.31278
											6.36	6.62298		1.32668	37.6169	1.53245	1.11451	58.0661	13.8349	9.41748	5.51256	2.15391	1.31563
											6.37	6.60563		1.32354	37.5614	1.53035	1.10901	58.0166	13.842	9.42535	5.49342	2.14854	1.31845
											6.38	6.59008		1.31808	37.5046	1.5296	1.10216	57.9672	13.8491	9.4332	5.47437	2.14319	1.32125
											6.39	6.5746		1.31196	37.4479	1.52884	1.0953	57.9178	13.8561	9.44104	5.45541	2.13784	1.32403
											6.4	6.55917		1.30587	37.3914	1.52808	1.09086	57.8684	13.8632	9.44886	5.43653	2.13252	1.32678
											6.41	6.54381		1.29981	37.3349	1.52732	1.08716	57.8191	13.8701	9.45667	5.41774	2.1272	1.32951
											6.42	6.5285		1.29376	37.2794	1.5257	1.08431	57.7698	13.8771	9.46445	5.39903	2.1219	1.33221
											6.43	6.51325		1.28775	37.228	1.51996	1.08557	57.7206	13.884	9.47223	5.38041	2.11661	1.3349
											6.44	6.49805		1.28176	37.176	1.51503	1.08602	57.6714	13.891	9.47998	5.36186	2.11133	1.33756
											6.45	6.48292		1.27579	37.1194	1.51474	1.08182	57.6223	13.8978	9.48772	5.3434	2.10884	1.3402
											6.46	6.46784		1.26985	37.0638	1.51354	1.07852	57.5732	13.9047	9.49544	5.32502	2.10678	1.34281
											6.47	6.45282		1.26393	37.0085	1.51214	1.07541	57.5241	13.9115	9.50315	5.30673	2.10472	1.3454
											6.48	6.4377		1.25819	36.9533	1.51072	1.07232	57.4751	13.9183	9.51084	5.29198	2.10612	1.3456
											6.49	6.4202		1.2557	36.8982	1.50926	1.06926	57.4261	13.925	9.51852	5.27774	2.10794	1.3467
											6.5	6.40278		1.25386	36.8464	1.50468	1.06931	57.3772	13.9318	9.52617	5.26356	2.10975	1.34779
											6.51	6.38543		1.25203	36.7946	1.50008	1.06938	57.3283	13.9385	9.53381	5.24945	2.11153	1.34886
											6.52	6.36814		1.25019	36.743	1.50617	1.06946	57.2794	13.9451	9.54144	5.2354	2.11329	1.3499
											6.53	6.35093		1.24836	36.6854	1.51839	1.0635	57.2306	13.9518	9.54905	5.22141	2.11503	1.35093
											6.54	6.33379		1.24653	36.6274	1.5311	1.05703	57.1818	13.9584	9.55664	5.20748	2.11675	1.35194
											6.55	6.31672		1.24471	36.5697	1.54353	1.05083	57.1331	13.965	9.56422	5.19361	2.1166	1.35292
											6.56	6.29972		1.24288	36.5154	1.55279	1.04779	57.0844	13.9715	9.57178	5.1798	2.11588	1.35389
											6.57	6.28513		1.23873	36.4611	1.56205	1.04476	57.0358	13.978	9.57932	5.16605	2.11514	1.35484
											6.58	6.27119		1.23399	36.4069	1.57129	1.04173	56.9872	13.9845	9.58685	5.15144	2.11348	1.35618
											6.59	6.25729		1.22928	36.3528	1.58052	1.03892	56.9386	13.991	9.59436	5.13233	2.10726	1.35877
											6.6	6.24345		1.22459	36.2988	1.58973	1.03621	56.8901	13.9974	9.60186	5.11331	2.10106	1.36134
											6.61	6.22966		1.21992	36.2449	1.59893	1.0335	56.8416	14.0038	9.60934	5.09438	2.09488	1.36388
											6.62	6.21591		1.21528	36.1911	1.59977	1.03147	56.7932	14.0102	9.6168	5.07553	2.08873	1.3664
											6.63	6.20222		1.21065	36.1374	1.59903	1.03061	56.7448	14.0166	9.62425	5.05677	2.08259	1.3689
											6.64	6.19039		1.20423	36.0838	1.59827	1.02975	56.6964	14.0229	9.63168	5.03809	2.07648	1.37137
											6.65	6.17897		1.19746	36.032	1.59585	1.03054	56.6481	14.0292	9.6391	5.01949	2.07039	1.37382
											6.66	6.16759		1.19073	35.9813	1.59242	1.03235	56.5998	14.0354	9.6465	5.00098	2.06432	1.37625
											6.67	6.15625		1.18403	35.9307	1.58884	1.03429	56.5516	14.0417	9.65388	4.98255	2.05827	1.37866
											6.68	6.14494		1.17737	35.8803	1.58525	1.03624	56.5034	14.0479	9.66125	4.9642	2.05224	1.38104
											6.69	6.13366		1.17074	35.83	1.58166	1.03825	56.4553	14.054	9.6686	4.94594	2.04615	1.3834
											6.7	6.12242		1.16414	35.7798	1.57954	1.04042	56.4072	14.0602	9.67594	4.92776	2.03995	1.38652
											6.71	6.11121		1.15758	35.7297	1.58663	1.04259	56.3591	14.0663	9.68326	4.90965	2.03378	1.39222
											6.72	6.10004		1.15105	35.6797	1.59371	1.04477	56.3111	14.0724	9.69056	4.89163	2.02763	1.39664
											6.73	6.0889		1.14455	35.6297	1.60077	1.04697	56.2631	14.0785	9.69785	4.87369	2.0215	1.399
											6.74	6.07779		1.13809	35.5799	1.60782	1.04917	56.2152	14.0845	9.70513	4.85572	2.01527	1.40146
											6.75	6.06672		1.13166	35.5302	1.61486	1.05137	56.1673	14.0905	9.71238	4.83656	2.00782	1.40515
											6.76	6.05568		1.12526	35.4805	1.62189	1.05359	56.1194	14.0965	9.71963	4.8175	2.00039	1.4088
											6.77	6.04467		1.1189	35.4293	1.63063	1.05409	56.0716	14.1024	9.72685	4.79851	1.99298	1.41243
											6.78	6.0337		1.11257	35.3751	1.64236	1.05159	56.0238	14.1083	9.73406	4.77961	1.9856	1.41603
											6.79	6.02276		1.10627	35.321	1.64696	1.0491	55.9761	14.1142	9.74126	4.7608	1.97874	1.4196
											6.8	6.01185		1.1	35.267	1.64767	1.04665	55.9284	14.1201	9.74843	4.74443	1.97602	1.42078
											6.81	6.00097		1.09376	35.2131	1.64797	1.04471	55.8807	14.1259	9.7556	4.73145	1.97661	1.41861
											6.82	5.99013		1.08756	35.1593	1.64821	1.04278	55.8331	14.1317	9.76274	4.71852	1.97718	1.41645
											6.83	5.97932		1.0818	35.1056	1.64844	1.04001	55.7855	14.1375	9.76988	4.70565	1.97774	1.41429
											6.84	5.96854		1.07671	35.052	1.64866	1.03692	55.738	14.1433	9.77699	4.69282	1.97828	1.41213
											6.85	5.95779		1.07165	34.9985	1.64888	1.03384	55.6905	14.149	9.78409	4.68005	1.97879	1.40998
											6.86	5.94707		1.06663	34.945	1.64909	1.03076	55.6431	14.1547	9.79118	4.66732	1.97929	1.40783
											6.87	5.93638		1.06164	34.8917	1.6493	1.02851	55.5957	14.1604	9.79825	4.65464	1.97978	1.40568
											6.88	5.92527		1.05713	34.8398	1.64806	1.02796	55.5483	14.166	9.8053	4.64201	1.98024	1.40353
											6.89	5.91142		1.05542	34.7897	1.64525	1.02884	55.501	14.1716	9.81234	4.62943	1.98069	1.40139
											6.9	5.89763		1.05372	34.7417	1.64031	1.03152	55.4537	14.1772	9.81936	4.6169	1.98111	1.39925
											6.91	5.88389		1.05202	34.6939	1.63536	1.03421	55.4064	14.1828	9.82637	4.60442	1.98152	1.39711
											6.92	5.8702		1.05034	34.6468	1.62973	1.03757	55.3592	14.1883	9.83336	4.59198	1.98192	1.39414
											6.93	5.85657		1.04866	34.6029	1.62096	1.04407	55.312	14.1938	9.84034	4.57959	1.98229	1.39059
											6.94	5.84298		1.04699	34.5591	1.61218	1.05058	55.2649	14.1993	9.8473	4.56725	1.98265	1.38705
											6.95	5.82944		1.04534	34.5154	1.6034	1.05709	55.2178	14.2047	9.85425	4.55496	1.98299	1.38353
											6.96	5.81596		1.04369	34.4718	1.59461	1.06361	55.1708	14.2102	9.86118	4.54271	1.98331	1.38001
											6.97	5.80252		1.04205	34.4283	1.58581	1.07013	55.1238	14.2156	9.86809	4.53051	1.98361	1.37651
											6.98	5.78913		1.04042	34.3837	1.57812	1.07554	55.0768	14.2209	9.87499	4.51836	1.9839	1.37302
											6.99	5.7758		1.0388	34.335	1.57472	1.07665	55.0299	14.2263	9.88187	4.50625	1.98417	1.36953
											7	5.76251		1.03718	34.2807	1.5769	1.0722	54.983	14.2316	9.88874	4.49419	1.98443	1.36606
											7.01	5.74927		1.03558	34.2266	1.57895	1.06774	54.9362	14.2369	9.8956	4.48217	1.9835	1.36259
											7.02	5.73608		1.03399	34.1773	1.57492	1.06808	54.8894	14.2421	9.90244	4.46912	1.98124	1.36022
											7.03	5.72096		1.03437	34.1287	1.57025	1.06905	54.8426	14.2474	9.90926	4.45491	1.97776	1.35906
											7.04	5.70528		1.03539	34.0803	1.56559	1.07002	54.7959	14.2526	9.91607	4.44076	1.97429	1.3579
											7.05	5.68965		1.0364	34.0319	1.56091	1.07099	54.7492	14.2578	9.92283	4.42667	1.97083	1.35673
											7.06	5.67409		1.0374	33.9827	1.55712	1.07096	54.7025	14.2629	9.92956	4.41264	1.96738	1.35555
											7.07	5.6586		1.0384	33.9319	1.5598	1.06652	54.6559	14.268	9.93627	4.39867	1.96393	1.35437
											7.08	5.64316		1.03939	33.8809	1.56526	1.06175	54.6094	14.2731	9.94297	4.38455	1.96029	1.35339
											7.09	5.62778		1.04037	33.8292	1.57147	1.05623	54.5628	14.2782	9.94965	4.36984	1.956	1.35306
											7.1	5.61247		1.04135	33.7776	1.57681	1.05071	54.5163	14.2833	9.95631	4.35519	1.95173	1.35272
											7.11	5.59722		1.04232	33.7261	1.57758	1.04518	54.4699	14.2883	9.96297	4.3406	1.94746	1.35237
											7.12	5.58203		1.04329	33.6747	1.57834	1.03965	54.4235	14.2933	9.9696	4.32608	1.94321	1.35201
											7.13	5.56689		1.04425	33.6233	1.57911	1.0363	54.3771	14.2983	9.97622	4.31162	1.93897	1.35164
											7.14	5.55182		1.0452	33.572	1.58673	1.03328	54.3308	14.3032	9.98283	4.29722	1.93474	1.35126
											7.15	5.53681		1.04615	33.5208	1.59528	1.03026	54.2845	14.3081	9.98942	4.28288	1.93052	1.35087
											7.16	5.52186		1.04709	33.4697	1.60382	1.02724	54.2383	14.313	9.996	4.2686	1.92631	1.35047
											7.17	5.50697		1.04803	33.4187	1.61236	1.02421	54.1921	14.3179	10.0026	4.25438	1.92211	1.35007
											7.18	5.49213		1.04896	33.3677	1.62089	1.02119	54.1459	14.3227	10.0091	4.24022	1.91793	1.34966
											7.19	5.47736		1.04988	33.3168	1.62941	1.01816	54.0998	14.3275	10.0156	4.22612	1.91375	1.34924
											7.2	5.46264		1.0508	33.266	1.63793	1.01246	54.0537	14.3323	10.0222	4.21208	1.90959	1.34881
											7.21	5.44798		1.05171	33.2153	1.64644	1.0067	54.0076	14.3371	10.0287	4.1981	1.90544	1.34837
											7.22	5.43338		1.05262	33.1647	1.65494	1.00092	53.9616	14.3418	10.0351	4.18418	1.9013	1.34864
											7.23	5.41884		1.05352	33.1141	1.6617	0.995141	53.9156	14.3465	10.0416	4.17031	1.89717	1.34935
											7.24	5.40435		1.05442	33.0644	1.66321	0.99011	53.8697	14.3512	10.0481	4.15651	1.89305	1.35004
											7.25	5.38992		1.05531	33.0157	1.66379	0.985992	53.8238	14.3559	10.0545	4.14359	1.88977	1.35095
											7.26	5.37555		1.05619	32.9671	1.66437	0.981867	53.778	14.3605	10.0609	4.13211	1.88788	1.35075
											7.27	5.36123		1.05707	32.9185	1.66494	0.977735	53.7321	14.3651	10.0673	4.12068	1.88599	1.35055
											7.28	5.34697		1.05794	32.8701	1.66551	0.973596	53.6864	14.3697	10.0737	4.10928	1.8841	1.35033
											7.29	5.33277		1.05881	32.8217	1.66608	0.971502	53.6406	14.3742	10.0801	4.09794	1.88221	1.35011
											7.3	5.31862		1.05967	32.7734	1.66664	0.97077	53.5949	14.3788	10.0865	4.08664	1.88031	1.34989
											7.31	5.30452		1.06053	32.7279	1.66442	0.972813	53.5493	14.3833	10.0928	4.07538	1.87841	1.34965
											7.32	5.29049		1.06138	32.6849	1.65989	0.977165	53.5037	14.3878	10.0992	4.06416	1.87652	1.34942
											7.33	5.2765		1.06256	32.6419	1.65536	0.981523	53.4581	14.3922	10.1055	4.05299	1.87462	1.34917
											7.34	5.26257		1.06432	32.599	1.65081	0.985886	53.4125	14.3966	10.1118	4.04186	1.87271	1.34892
											7.35	5.2487		1.06608	32.555	1.64743	0.989084	53.367	14.401	10.1181	4.03078	1.87081	1.34867
											7.36	5.23488		1.06782	32.5077	1.64748	0.988842	53.3216	14.4054	10.1244	4.01974	1.86891	1.3484
											7.37	5.22111		1.06956	32.4604	1.64754	0.988601	53.2761	14.4098	10.1307	4.00874	1.867	1.34814
											7.38	5.20785		1.07083	32.4132	1.64758	0.988837	53.2308	14.4141	10.1369	3.99778	1.86509	1.34786
											7.39	5.19629		1.07045	32.3661	1.64763	0.98795	53.1854	14.4184	10.1431	3.98686	1.86318	1.34758
											7.4	5.18477		1.07007	32.3191	1.64767	0.985831	53.1401	14.4227	10.1494	3.97599	1.86127	1.3473
											7.41	5.1733		1.06969	32.275	1.64493	0.987052	53.0948	14.4269	10.1556	3.96516	1.85936	1.347
											7.42	5.16186		1.06932	32.2313	1.64177	0.98994	53.0496	14.4312	10.1618	3.95437	1.85744	1.34694
											7.43	5.15046		1.06895	32.1877	1.63861	0.992828	53.0044	14.4354	10.1679	3.94362	1.85552	1.34744
											7.44	5.1391		1.06859	32.1413	1.63831	0.992851	52.9593	14.4396	10.1741	3.93291	1.85361	1.34793
											7.45	5.12778		1.06823	32.0944	1.63865	0.992232	52.9141	14.4437	10.1803	3.92224	1.85169	1.34841
											7.46	5.1165		1.06788	32.0515	1.63504	0.995554	52.8691	14.4478	10.1864	3.91161	1.84977	1.34888
											7.47	5.10525		1.06752	32.0087	1.63143	0.998869	52.824	14.452	10.1925	3.90102	1.84784	1.34933
											7.48	5.09405		1.06718	31.9659	1.62783	1.00218	52.779	14.456	10.1986	3.89048	1.84592	1.34978
											7.49	5.08288		1.06683	31.9232	1.62423	1.00548	52.7341	14.4601	10.2047	3.87997	1.844	1.35022
											7.5	5.07175		1.06649	31.8801	1.62115	1.00824	52.6891	14.4641	10.2108	3.8695	1.84207	1.35065
											7.51	5.06066		1.06616	31.8333	1.6218	1.00728	52.6443	14.4681	10.2168	3.85908	1.84014	1.35106
											7.52	5.04961		1.06582	31.7872	1.62186	1.00691	52.5994	14.4721	10.2229	3.84869	1.83821	1.35147
											7.53	5.03871		1.06539	31.7411	1.6219	1.00655	52.5546	14.4761	10.2289	3.83834	1.83628	1.35187
											7.54	5.02786		1.06493	31.6952	1.62192	1.0062	52.5098	14.48	10.2349	3.82803	1.83435	1.35226
											7.55	5.01706		1.06447	31.6493	1.62193	1.00586	52.4651	14.4839	10.241	3.81776	1.83242	1.35264
											7.56	5.00629		1.06402	31.6035	1.62193	1.00552	52.4204	14.4878	10.2469	3.80753	1.82861	1.35301
											7.57	4.99556		1.06357	31.5609	1.61885	1.00873	52.3758	14.4917	10.2529	3.79733	1.82469	1.35336
											7.58	4.98655		1.06144	31.5185	1.61568	1.01385	52.3312	14.4955	10.2589	3.78717	1.82077	1.35371
											7.59	4.97879		1.0581	31.4761	1.61249	1.01899	52.2866	14.4993	10.2648	3.77706	1.81687	1.35405
											7.6	4.97106		1.05477	31.4338	1.60929	1.02413	52.242	14.5031	10.2708	3.76698	1.81298	1.35439
											7.61	4.96336		1.05145	31.3917	1.60607	1.02859	52.1975	14.5069	10.2767	3.75693	1.80909	1.35471
											7.62	4.95549		1.04834	31.3496	1.60283	1.03189	52.1531	14.5106	10.2826	3.74693	1.80522	1.35502
											7.63	4.94552		1.04737	31.3076	1.59957	1.0352	52.1086	14.5143	10.2885	3.73696	1.80135	1.35532
											7.64	4.93559		1.0464	31.2657	1.5963	1.03853	52.0643	14.518	10.2944	3.72703	1.79749	1.35561
											7.65	4.92569		1.04544	31.2239	1.59301	1.04187	52.0199	14.5217	10.3002	3.71714	1.79365	1.3559
											7.66	4.91583		1.04447	31.1821	1.5897	1.04422	51.9756	14.5254	10.3061	3.70728	1.78981	1.35617
											7.67	4.906		1.04352	31.1405	1.58638	1.044	51.9313	14.529	10.3119	3.69746	1.78598	1.35644
											7.68	4.89621		1.04256	31.1009	1.58484	1.04572	51.8871	14.5326	10.3177	3.68767	1.78217	1.35669
											7.69	4.88646		1.04161	31.0582	1.5869	1.04432	51.8429	14.5362	10.3235	3.67792	1.77836	1.35694
											7.7	4.87674		1.04066	31.0156	1.58897	1.0429	51.7987	14.5397	10.3293	3.66821	1.77456	1.35718
											7.71	4.86705		1.03971	30.9731	1.59103	1.04148	51.7546	14.5432	10.3351	3.65854	1.77077	1.35741
											7.72	4.85741		1.03876	30.9307	1.59308	1.04005	51.7105	14.5467	10.3409	3.64889	1.76699	1.35763
											7.73	4.84779		1.03782	30.8883	1.59513	1.03862	51.6665	14.5502	10.3466	3.63929	1.76322	1.35784
											7.74	4.83821		1.03688	30.8461	1.59717	1.03718	51.6225	14.5537	10.3524	3.62972	1.76071	1.35804
											7.75	4.82867		1.03594	30.8038	1.59921	1.03573	51.5785	14.5571	10.3581	3.62018	1.75838	1.35824
											7.76	4.81916		1.03501	30.7617	1.60124	1.03428	51.5346	14.5605	10.3638	3.61068	1.75605	1.35842
											7.77	4.80824		1.03551	30.7196	1.60326	1.03282	51.4907	14.5639	10.3695	3.60122	1.75372	1.3586
											7.78	4.79645		1.03693	30.6776	1.60529	1.03135	51.4468	14.5673	10.3752	3.59179	1.75139	1.35877
											7.79	4.7847		1.03835	30.6357	1.6073	1.03072	51.403	14.5706	10.3808	3.58239	1.74906	1.35893
											7.8	4.77299		1.03976	30.5939	1.60931	1.03114	51.3592	14.574	10.3865	3.57303	1.74673	1.35908
											7.81	4.76132		1.04116	30.5521	1.61132	1.03155	51.3155	14.5773	10.3921	3.5637	1.74441	1.35922
											7.82	4.74969		1.04256	30.5104	1.61332	1.03196	51.2717	14.5805	10.3978	3.5544	1.74208	1.35935
											7.83	4.73811		1.04395	30.4662	1.61792	1.02976	51.2281	14.5838	10.4034	3.54514	1.73975	1.35948
											7.84	4.72657		1.04534	30.42	1.62257	1.02559	51.1844	14.587	10.409	3.53592	1.73742	1.3596
											7.85	4.71506		1.04672	30.374	1.62489	1.02141	51.1408	14.5902	10.4145	3.52672	1.73509	1.35971
											7.86	4.7036		1.04809	30.3317	1.62346	1.02097	51.0973	14.5934	10.4201	3.51756	1.73276	1.35981
											7.87	4.69218		1.04946	30.2911	1.62045	1.02211	51.0538	14.5966	10.4257	3.50843	1.73049	1.3599
											7.88	4.6808		1.05083	30.2506	1.61743	1.02325	51.0103	14.5997	10.4312	3.49929	1.72882	1.36003
											7.89	4.66946		1.05219	30.2101	1.61442	1.02438	50.9668	14.6028	10.4368	3.48906	1.72604	1.36128
											7.9	4.65816		1.05354	30.1698	1.6114	1.02551	50.9234	14.6059	10.4423	3.47887	1.72325	1.36251
											7.91	4.6469		1.05489	30.1295	1.60838	1.02707	50.88	14.609	10.4478	3.46871	1.72047	1.36373
											7.92	4.63656		1.05535	30.0892	1.60536	1.03093	50.8367	14.612	10.4533	3.4586	1.71769	1.36493
											7.93	4.62739		1.05468	30.0491	1.60233	1.03551	50.7934	14.6151	10.4587	3.44852	1.71492	1.36612
											7.94	4.61825		1.05401	30.009	1.59931	1.04008	50.7501	14.6181	10.4642	3.43848	1.71215	1.3673
											7.95	4.60914		1.05334	29.9689	1.59629	1.04465	50.7069	14.621	10.4696	3.42847	1.70938	1.36846
											7.96	4.60006		1.05267	29.929	1.59326	1.04921	50.6637	14.624	10.4751	3.41851	1.70661	1.36961
											7.97	4.59101		1.05201	29.8891	1.59023	1.05377	50.6206	14.6269	10.4805	3.40858	1.70385	1.37075
											7.98	4.582		1.05135	29.8493	1.5872	1.05742	50.5775	14.6298	10.4859	3.39869	1.70109	1.37187
											7.99	4.57301		1.0507	29.8095	1.58418	1.05852	50.5344	14.6327	10.4913	3.38883	1.69833	1.37298
											8	4.56405		1.05004	29.7682	1.58284	1.05792	50.4913	14.6356	10.4967	3.37914	1.69569	1.37395

## Sheet: FIGURE 6
											FIGURE 6A
figure 6E												U	C000	C100	C010	C001	C110	C101	C011	C111
3h-palmitic acid incorporation in myc-DHHC6 wt or mutants myc-DHHC6 with or without DHHC16 overexpressed- Total cell extract											DHHC6 WT
											ub	2.29297	22.2279	2.76361	8.20023	0.180559	0.528866	0.0432939	4.87031	0.00700913
		1		2		3	mean	SD			mean	6.81243	70.2578	7.73736	11.3452	0.183665	0.254587	0.0130002	3.45162	0.00129467
wt-dhhc6	1465	100	1065	100	1189	100	100	0			lb	2.85934	23.8738	2.80698	4.61915	0.108832	0.201887	0.00932725	1.92196	0.000933105
wt-dhhc6+dhhc16	1445	98.6348	998	93.7089	1011	85.0294	92.4577	6.88845			DHHC6 Ov.
CAA-dhhc6	1503	102.594	1234	115.869	1156	97.2246	105.229	9.59726			ub	2.29297	2.40961	2.43738	13.8505	0.864533	1.37696	0.465034	66.7813	0.59753
CAA-dhhc6+dhhc16	728	49.6928	323	30.3286	533	44.8276	41.6164	10.0736			mean	6.81243	1.56959	4.4406	7.65422	0.548352	0.628757	0.247878	55.0481	0.292765
AAA-dhhc6	1555	106.143	1266	118.873	995	83.6838	102.9	17.8175			lb	2.85934	0.885071	2.32468	5.56276	0.347605	0.436726	0.168759	42.5661	0.228822
AAA-dhhc6+dhhc16	1560	106.485	1290	121.127	1045	87.889	105.167	16.658			APT2 10%
											ub	2.29297	7.28333	1.97751	15.375	0.317956	2.48581	0.321535	82.935	0.545713
figure 6F											mean	6.81243	3.07503	3.99789	11.2335	0.160696	1.74596	0.148317	82.8695	0.254512
3h-palmitic acid incorporation in endogenous calnexin with or without DHHC16 overexpressed											lb	2.85934	1.39042	1.52941	6.29117	0.103596	1.19977	0.0977988	66.7154	0.19919
											siRNA APT2
		1		2		3	mean	SD			ub	2.29297	0.865894	1.11983	0.00434245	0.00704568	9.23939	0.896404	6.58839	1.2338
control	142	100	174	100	116	100	100	0			mean	6.81243	1.42207	1.70132	0.00264356	0.00371198	5.18756	0.700175	1.41286	0.345248
control+dhhc16	198	139.437	299	171.839	159	137.069	149.448	19.4272			lb	2.85934	0.629423	0.662315	0.00226105	0.00251773	4.1346	0.470981	1.17179	0.241839
wt-dhhc6	365	257.042	428	245.977	278	239.655	247.558	8.80072
wt-dhhc6+dhhc16	533	375.352	648	372.414	347	299.138	348.968	43.1791
CAA-dhhc6	326	229.577	312	179.31	204	175.862	194.917	30.0666
CAA-dhhc6+dhhc16	197	138.732	197	113.218	155	133.621	128.524	13.4991
AAA-dhhc6	133	93.662	188	108.046	110	94.8276	98.8452	7.98941
AAA-dhhc6+dhhc16	199	140.141	288	165.517	148	127.586	144.415	19.3233
											FIGURE 6B
												U	C000	C100	C010	C001	C110	C101	C011	C111
											DHHC6 CAA
											ub	2.29297	24.7268	3.48239	0	0	0	0	0	0
											mean	6.81243	67.0817	10.32	0	0	0	0	0	0
											lb	2.85934	26.6225	3.26577	0	0	0	0	0	0
											DHHC6 CAA Ov.
											ub	2.29297	6.03571	8.95136	0	0	0	0	0	0
											mean	6.81243	8.40006	18.3386	0	0	0	0	0	0
											lb	2.85934	3.40229	5.76285	0	0	0	0	0	0

## Sheet: FIGURE S2-1
figure S2-supplement-1-A
3h-palmitic acid incorporation in myc-DHHC6 wt and mutants after dhhc6 knock down
		1		2		3		4	average	SD
wt-shcontrol	34223	100	43665	100	40889	100	45332	100	100	0
AAA-sh-control	1899	5.55	2904	6.65	2269	5.55	3123	6.89	6.16	0.71
DDHHC-shcontrol	31890	93.1829	40766	93.3608	40654	99.4253	42110	92.8924	94.7154	3.14587
wt-shDHHC6	33223	97.078	44255	101.351	38776	94.8324	46779	103.192	99.1134	3.83462
AAA-shDHHC6	1866	5.45	1760	4.03	1251	3.06	1822	4.02	4.14	0.98
DDHHC-shDHHC6	32556	95.129	42132	96.4892	39778	97.2829	45998	101.469	97.5926	2.73316
figure S2- supplement 1-B
3h-palmitic acid incorporation in myc-DHHC6 wt and cystein mutants after dhhc RNAi
dhhc RNAi
	wt	wt-sd	aac	aac-sd	cca	cca-sd
ctle	100	0	100	0	100	0
R-DHHC1	79.3	8.75	83.5	9.9	85.98	5.67
R-DHHC7	74.55	16.23	78.9	12.45	79.9	9.8
R-DHHC9	77.33	14.41	87.89	12.08	90.09	13.07
R-DHHC12	80.75	25.38	90.67	21.89	97.08	13.99
R-DHHC14	85.24	13.85	97.56	9.6	90.09	7.8
R-DHHC16	41.44	7.7	33.87	6.9	31.08	12.9
R-DHHC18	67.82	13.56	70.77	8.8	74.67	12
R-DHHC21	86.78	21.23	75.68	8.9	70.56	11.76
		1-wt		1-aac		1-cca
	45770	100	30766	100	38777	100
	40127	87.67	27539	89.51	35376	91.23
	39614	86.55	27539	89.95	34527	89.04
	37485	81.9	28526	92.72	36753	94.78
	44337	96.87	30631	99.56	39192	101.07
	43047	94.05	31483	102.33	36706	94.66
	20674	45.17	12324	40.06	9826	25.34
	32890	71.86	23991	77.98	31666	81.66
	43738	95.56	24037	78.13	28354	73.12
		2-wt		2-aac		2-cca
	39776	100	26555	100	30111	100
	30743	77.29	21629	81.45	24019	79.77
	28066	70.56	18549	69.85	24339	80.83
	34872	87.67	21496	80.95	31216	103.67
	31594	79.43	23079	86.91	30132	100.07
	33869	85.15	24077	90.67	25727	85.44
	17374	43.68	8221	30.96	10171	33.78
	27743	69.75	19425	73.15	21186	70.36
	36021	90.56	18695	70.4	22252	73.9
		3-wt		3-aac		3-cca
	46508	100	29088	100	35542	100
	33904	72.9	23137	79.54	30897	86.93
	30956	66.56	22365	76.89	24819	69.83
	29035	62.43	26168	89.96	25526	71.82
	30672	65.95	24879	85.53	32027	90.11
	35606	76.56	28992	99.67	32045	90.16
	16506	35.49	8898	30.59	12123	34.11
	28769	61.86	17793	61.17	25594	72.01
	34504	74.19	22828	78.48	22985	64.67
figure S2-supplement 1-C
3h-palmitic acid incorporation in myc-DHHC6 after dhhc overexpression
DHHC overexpression
	value	%	1		2		3		4		5
ctle	34222		22435		33088		40778		43122		39887
ctle	30778		28776		32998		41223		43221		40786
ctle	28556		26554		34078		45339		45099		41239		MEAN	SD	P-Value
mean ctle	31185.3	100	25921.7	100	33388	100	42446.7	100	43814	100	40637.3	100	100	9.03339e-06
1	38665	123.985	27665	106.725	39887	119.465	45553	107.318	44780	102.205	50786	124.974	114.112	9.8651	0.00568857
2	30889	99.0498	25443	98.1534	34342	102.857	42776	100.776	43569	99.4408	42345	104.202	100.747	2.35399	0.455228
3	32443	104.033	25089	96.7877	36554	109.482	43099	101.537	49870	113.822	43443	106.904	105.428	6.01364	0.0514893
4	35443	113.653	24331	93.8636	32331	96.8342	45666	107.584	43568	99.4385	40887	100.614	101.998	7.32587	0.519224
5	30778	98.6938	27664	106.722	34990	104.798	42239	99.5108	45630	104.145	42217	103.887	102.959	3.15876	0.0446414
6	35009	112.261	27008	104.191	34997	104.819	42088	99.155	43328	98.8908	44098	108.516	104.639	5.22451	0.0547166
7	35442	113.65	33245	128.252	38665	115.805	49886	117.526	51230	116.926	49987	123.008	119.194	5.41731	5.72953e-06
8	34332	110.09	26440	102	33450	100.186	42331	99.7275	43298	98.8223	42221	103.897	102.454	4.15618	0.178744
9	41223	132.187	33425	128.946	33560	100.515	40786	96.0876	49870	113.822	44879	110.438	113.666	14.6213	0.0450552
11	38776	124.341	25334	97.7329	34088	102.097	42228	99.4848	43987	100.395	40007	98.4489	103.75	10.2025	0.389145
12	47760	153.149	33208	128.109	39007	116.829	53340	125.664	49768	113.589	47665	117.294	125.772	14.5275	0.00145383
13	31990	102.58	25553	98.5778	34077	102.064	42008	98.9665	46758	106.719	40776	100.341	101.541	3.00054	0.236845
14	31088	99.6879	24008	92.6175	33546	100.473	41342	97.3975	48970	111.768	40887	100.614	100.426	6.31453	0.871918
15	30566	98.014	25553	98.5778	32760	98.1191	43088	101.511	46553	106.251	41223	101.441	100.652	3.17462	0.625596
16	49887	159.969	44208	170.545	49665	148.751	55098	129.805	55386	126.412	57886	142.445	146.321	17.1064	5.83333e-05
17	29776	95.4808	25443	98.1534	34220	102.492	48278	113.738	43323	98.8794	43320	106.601	102.557	6.69876	0.371727
18	40786	130.786	26775	103.292	37665	112.81	49987	117.764	40878	93.2989	42445	104.448	110.4	13.0692	0.0798544
19	28776	92.2742	26087	100.638	31220	93.5066	42886	101.035	43546	99.3883	40879	100.595	97.9061	3.9434	0.222553
20	29066	93.2041	25443	98.1534	33088	99.1015	41886	98.6791	45268	103.319	41112	101.168	98.9375	3.39852	0.46147
21	36554	117.215	29006	111.899	35409	106.053	41332	97.374	45553	103.969	52334	128.783	110.882	11.0921	0.0371156
22	29887	95.8367	24553	94.72	34088	102.097	40998	96.5871	43320	98.8725	41123	101.195	98.218	2.99671	0.175899
23	25443	81.5864	24998	96.4367	35112	105.164	45332	106.798	44980	102.661	42332	104.17	99.4693	9.45947	0.89342
24	33890	108.673	25443	98.1534	30789	92.2158	40887	96.3256	48760	111.289	44088	108.491	102.525	7.92489	0.453273

## Sheet: FIGURE S2-2
figure S2-supplement 2A
quantitative RT-PCR HELA cells
N=4
	MEAN	SD	mean	SD	MEAN	SD
rnai:	DHHC6	DHHC6	DHHC16	DHHC16	Calnexin	Calnexin
hela ctl 1	100	4.17546e-07	100	3.00245e-07	100	1.99064e-07
hela ctl 2	100.25	1.28326	105.64	6.41157	100.221	2.21311
R6-1	13.3116	3.03723	137.8	9.4575	102.568	2.53991
R6-2	11.9456	2.28766	132.846	9.40909	99.791	2.85958
R16-1	101.127	3.591	12.7145	1.36109	98.5296	3.82533
R16-2	101.767	2.50953	13.712	3.69303	97.3647	2.98339
figure S2-supplement2B
quantitative RT-PCR in HAP cells
	ATF6	Climp	CMG2	CNX	GP78	LRP6	DHHC16	DHHC2	DHHC6	Tem8
delDHHC6 HAP	0.864835	0.850502	1.03283	1.08404	0.959293	0.60747	1.86509	0.865417	0.405306	0.973061
control HAP	0.877417	1.13014	0.715201	0.906982	1.05494	0.912209	0.510441	0.893308	0.722929	1.14005
	clt2	ctl1	ctl3
delDHHC6 HAP	0.662721	0.451345	0.422016
control HAP	0.910773	0.611819	0.712191
geNorm	0.385658	0.31276	0.28468
Choose clt1= TBP and ctl3=Alass for normalisation

## Sheet: FIGURE S3-1
figure S3-
3h-palmitic acid pulse chase in myc-DHHC6 wt and cystein mutants, with or without overexpression DHHC16, RNAi APT2
20min pulse
supplement 1A
time	WT	SD-WT N=4	APT1, N=1
0	100	0	100
0.5	98.3783	0.696392	99.3997
1	95.9668	2.05317	93.8084
2	86.2854	2.33545	83.6361
3	74.313	1.19593	65.564
5	66.6802	1.10843	63.6708
20	41.8943	1.05444	35.9957
24	34.1528	1.53793	24.2608
supplement 1B
time	ACA	SD-ACA, N=3	ACA, OE DHHC16	SD-ACA OE DHHC16, N=3	ACA-siRNA APT2	SD-ACA-siRNA APT2, N=3
0	100	0	100	0	100	0
0.5	99.4852	2.10712	98.7325	2.17925	95.59	3.69514
1	95.7871	2.834	91.34	5.98263	93.8298	3.00605
2	93.1079	0.318732	84.7947	5.85319	83.0963	3.36008
3	83.9728	3.49074	84.1565	7.03289	79.6513	2.35993
5	76.3399	7.32237	76.0615	6.74889	71.5675	1.05209
20	65.4298	5.04078	62.6375	6.4007	61.8607	7.76097
24	63.4581	4.45692	51.3652	8.30208	54.5389	6.39585
supplement 1C
time	CCA	SDCCA N=3	cca, OE DHHC16	SD-CCA OE DHHC16, N=3	cca-siRNA APT2	SD-cca-siRNA APT2, N=3
0	100	0	100	0	100	0
0.5	99.5423	1.5869	84.1726	4.03246	83.4178	3.69514
1	88.9555	0.0155689	74.2608	7.60395	80.5595	3.00605
2	80.2263	5.95391	56.492	5.48322	70.7259	3.36008
3	70.4476	2.48129	46.8285	8.78138	56.6302	2.35993
5	60.9612	0.440595	38.3915	6.34781	41.1938	1.05209
20	45.735	1.08458	27.5596	7.19827	29.9593	7.76097
24	38.8607	6.37488	24.7843	6.94704	23.2007	6.39585

## Sheet: figure S5-1
FIGURE 5-SUPPLEMENT 1
EXPERMENTAL EXPRIMENTS
35S- 20MIN. PULSE CHASE EXPRIMENTS										35S- 2 HOURS . PULSE CHASE EXPRIMENTS
time	ACC	ACC, SD N=3	CAA	CAA, SD- N=3	AAA	SD, N=5			time	WT	WT, SD,N=4	CAA	CAA, SD. N=3
0	100	0	100	0	100	0			0	100	0	100	0
0.5	99.4214	1.23756	99.7005	1.63679	97.8378	0.4226			0.5	97.5167	3.03422	95.7426	5.15963
1	96.2519	1.77214	96.9458	1.68212	90.4271	2.46727			1	93.0916	2.18679	87.8701	4.8896
2	89.0339	0.853569	89.4737	4.47942	83.108	0.488902			2	89.8317	2.7593	85.8624	5.1343
3	73.4069	0.06143	78.3126	5.02986	70.3023	1.10865			3	83.9401	4.74051	75.757	10.528
5	62.4058	3.26205	70.7701	2.34227	63.5919	0.844019			5	71.1433	1.3462	63.178	7.53768
20	49.9105	2.33953	60.5103	5.83057	47.4497	1.41583			20	54.967	4.4127	52.1034	12.6508
24	45.8224	0.69793	49.0096	9.67984	36.221	1.01823			24	48.2866	2.86428	40.2888	2.38066
3H-PALMITIC ACID 2 HOURS PULSE CHASE										3H-PALMITIC ACID INCORPORATION
	mean-CAA	CAA,SD-N=3							temps	wt-N=4	WT, SD, N=4
0	100	0							0.5	55.7698	19.2979
0.5	71.0682	2.23176							1	100	0
1	46.5882	2.06489							1.5	134.96	20.426
2	27.4442	1.1549							2	208.179	7.30326
4	19.8219	0.842648							3	307.258	48.3608
6	11.4722	1.72656							4	498.576	78.2766
8	8.29761	1.05601							5	608.504	72.5889
									6	639.092	100.321
									7	656.477	100.42
SIMULATIONS
FIGURE S5-1
S35																	3H
Time (h)	DHHC6 ACC (%)	ub	lb	DHHC6 CAA (%)	ub	lb	DHHC6 WT 2h labelling (%)	ub	lb	DHHC6 CAA 2h labelling (%)	ub	lb	DHHC6 AAA (%)	ub	lb		Time (h)	DHHC6 WT Incorporation (%)	ub	lb	Time (h)	DHHC6 CAA H3 (%)	ub	lb
0	100	0	0	100	0	0	100	0	0	100	0	0	100	0	0		0.01	0.00249882	0	0	0	100	0	0
0.001	99.9822	0.00430327	0.00210354	100.29	0.00197539	0.000984377	100.044	0.000123171	0.000187632	100.044	0.000146175	0.000180604	99.9822	0.00430398	0.00210347	100	0.06	0.087796	0.000219877	0.000223874	0.01	99.3255	0.0729187	0.0620378
0.501	92.0707	1.3722	0.72144	101.636	1.51796	0.778651	96.5386	0.17222	0.24345	96.5243	0.308427	0.272505	92.0707	1.37235	0.721405		0.11	0.287772	0.00781648	0.00765356	0.02	98.6555	0.144467	0.123358
1.001	86.03	1.72849	0.961139	94.8433	1.93228	1.09889	91.5882	0.20506	0.268711	91.5151	0.297292	0.298105	86.0309	1.73505	0.960279		0.16	0.593487	0.0255136	0.0262255	0.03	97.9901	0.214587	0.184046
1.501	81.3815	1.47335	0.912171	89.4734	1.58501	1.14456	87.638	0.187175	0.175434	87.5129	0.27271	0.201848	81.3812	1.41848	0.912424		0.21	0.997706	0.0527177	0.0536823	0.04	97.3293	0.283411	0.244291
2.001	77.7785	1.22568	0.699868	85.1783	1.3445	1.14426	84.2433	0.192867	0.360384	84.1339	0.392176	0.252774	77.7725	1.13977	0.705642		0.26	1.49464	0.0888567	0.0883373	0.05	96.6731	0.351033	0.303931
2.501	74.9323	0.82063	0.437957	81.7492	1.21264	0.976464	81.4467	0.350446	0.568579	81.1899	0.556848	0.450157	74.9418	0.810446	0.426257		0.31	2.07115	0.135194	0.127086	0.06	96.0213	0.417516	0.362954
3.001	72.6397	0.375704	0.178857	78.8876	1.3662	0.798784	78.9888	0.458648	0.788592	78.6676	0.752581	0.629812	72.6348	0.381588	0.181148		0.36	2.72289	0.181097	0.174638	0.07	95.374	0.48291	0.421356
3.501	70.6591	0.129753	0.129001	76.5102	1.55158	0.560597	76.9429	0.70332	0.9691	76.4007	0.921408	0.873348	70.64	0.145526	0.133731		0.41	3.44365	0.230353	0.227347	0.08	94.7311	0.547255	0.479134
4.001	68.9303	0.341157	0.342155	74.2919	1.39539	0.555327	75.0893	0.848665	1.13715	74.3911	1.09276	1.01623	68.9162	0.333675	0.354023		0.46	4.22724	0.287143	0.284227	0.09	94.0926	0.610586	0.536286
4.501	67.4716	0.54667	0.526385	72.2674	1.58308	0.670618	73.4973	1.03664	1.223	72.6251	1.32195	1.15656	67.4454	0.546462	0.567987		0.51	5.07221	0.349971	0.345242	0.1	93.4585	0.672931	0.592814
5.001	66.1837	0.686464	0.728179	70.4307	1.69369	0.824276	72.0588	1.16099	1.14078	70.8718	1.34558	1.43273	66.1674	0.721485	0.716491		0.56	5.96419	0.421264	0.404532	0.11	92.8293	0.734869	0.648163
5.501	65.0809	0.875844	0.813584	68.7817	1.92232	0.967374	70.7201	1.22423	1.17987	69.2898	1.47235	1.53729	65.0307	0.8605	0.845017		0.61	6.90938	0.491609	0.470281	0.12	92.2046	0.79612	0.702636
6.001	64.1206	1.01557	0.851582	67.2827	2.17816	1.09971	69.4801	1.26523	1.28135	67.8807	1.68047	1.55206	63.9624	0.883596	1.00985		0.66	7.89521	0.571893	0.531616	0.13	91.5843	0.856534	0.756402
6.501	63.1716	1.07056	0.951731	65.8813	2.46684	1.20365	68.3153	1.43997	1.30136	66.6284	1.95279	1.55274	63.0709	0.980501	1.01976		0.71	8.91392	0.653915	0.599052	0.14	90.9683	0.916118	0.809472
7.001	62.2599	1.05589	1.09198	64.5458	2.79505	1.37335	67.14	1.38829	1.33081	65.3536	2.40869	1.65004	62.1922	1.12916	1.10612		0.76	9.94735	0.738482	0.665185	0.15	90.3566	0.974882	0.861854
7.501	61.5591	1.25915	1.13475	63.2655	3.14871	1.54096	65.9813	1.36152	1.47334	64.1918	2.81476	1.7789	61.4905	1.22448	1.12174		0.81	11.0236	0.812143	0.748096	0.16	89.7491	1.03283	0.913556
8.001	60.866	1.41049	1.17209	62.0074	3.45649	1.68525	64.9657	1.41203	1.36319	63.0062	3.29892	1.91577	60.7296	1.26742	1.28148		0.86	12.1115	0.897521	0.821658	0.17	89.1458	1.08998	0.964587
8.501	60.2021	1.41558	1.27662	60.8968	3.83934	1.77393	63.9302	1.38338	1.41938	61.804	3.71251	2.0368	60.0667	1.39984	1.33331		0.91	13.2423	0.961702	0.912792	0.18	88.5467	1.14632	1.01495
9.001	59.5567	1.43779	1.33923	59.8444	4.23748	1.70977	62.9387	1.35242	1.50349	60.5742	4.03721	2.30843	59.4569	1.51796	1.37161		0.96	14.392	1.04413	0.981392	0.19	87.9518	1.20187	1.06467
9.501	58.9614	1.55023	1.34454	58.8558	4.65909	1.72328	62.0213	1.32599	1.69729	59.5213	4.42145	2.39674	58.8852	1.64935	1.34088		1.01	15.5516	1.12964	1.04263	0.2	87.361	1.25663	1.11373
10.001	58.4134	1.77856	1.30875	57.9032	5.07849	1.78682	61.1615	1.43683	1.78663	58.6082	4.89918	2.35186	58.2991	1.63144	1.37434		1.06	16.7217	1.21597	1.10804	0.21	86.7742	1.31061	1.16215
10.501	57.8791	1.73991	1.33453	56.7467	5.26926	2.09503	60.3636	1.56346	1.82495	57.6903	5.32068	2.36107	57.7042	1.63671	1.40165		1.11	17.9019	1.30003	1.17407	0.22	86.1915	1.36381	1.20994
11.001	57.3671	1.84587	1.3898	55.797	5.63921	2.2055	59.5405	1.67202	1.79732	56.8922	5.79742	2.25333	57.1897	1.76549	1.43152		1.16	19.09	1.39065	1.2383	0.23	85.6127	1.41624	1.2571
11.501	56.857	1.84236	1.55105	54.8229	5.95079	2.38129	58.8189	1.93601	1.73222	55.9934	6.14153	2.27919	56.6536	1.68702	1.43594		1.21	20.279	1.46716	1.29432	0.24	85.038	1.4679	1.30365
12.001	56.3314	1.81472	1.6237	53.9385	6.30755	2.50782	57.9786	1.83578	1.78897	54.9292	6.28945	2.50198	56.1293	1.75778	1.49617		1.26	21.4581	1.54975	1.33285	0.25	84.4672	1.51881	1.34957
12.501	55.8785	1.85422	1.61206	53.0165	6.52251	2.64668	57.2146	1.80904	1.79993	53.9973	6.53975	2.67137	55.6522	1.72688	1.55062		1.31	22.6327	1.62527	1.42155	0.26	83.9003	1.56896	1.39489
13.001	55.3712	1.67242	1.67841	52.1374	6.74928	2.73572	56.5467	1.93138	1.75032	53.184	6.87967	2.71006	55.1796	1.78378	1.59596		1.36	23.8123	1.69399	1.50937	0.27	83.3373	1.61836	1.43961
13.501	54.9753	1.86783	1.64572	51.2291	6.91729	2.86618	55.7968	1.99367	1.76837	52.3252	7.14597	2.89278	54.7734	1.99893	1.55837		1.41	25.01	1.75478	1.56886	0.28	82.7782	1.66702	1.48373
14.001	54.5566	2.07832	1.52206	50.4454	7.1816	2.94574	55.1635	2.21981	1.65378	51.4231	7.3512	3.06166	54.3069	2.12598	1.6699		1.46	26.2006	1.83207	1.59011	0.29	82.2229	1.71495	1.52727
14.501	54.0764	2.28702	1.63694	49.5565	7.31364	3.13726	54.4968	2.31112	1.64972	50.5515	7.61893	3.23115	53.9151	2.38982	1.66344		1.51	27.3636	1.90289	1.61163	0.3	81.6714	1.76215	1.57022
15.001	53.605	2.51176	1.82123	48.6248	7.40211	3.38074	53.7998	2.42025	1.75643	49.662	7.84284	3.37827	53.474	2.59566	1.75649		1.56	28.5109	1.93891	1.66583	0.31	81.1236	1.80863	1.61259
15.501	53.1872	2.76545	1.90131	47.7617	7.58913	3.6018	53.0893	2.54386	1.87224	48.8095	8.0787	3.49115	53.006	2.78325	1.7893		1.61	29.6441	1.96182	1.73774	0.32	80.5796	1.85438	1.65439
16.001	52.7352	2.96565	1.99	46.9252	7.77593	3.73678	52.4042	2.51877	1.94574	47.9132	8.14375	3.69751	52.5773	3.02692	1.81039		1.66	30.7687	1.98499	1.81377	0.33	80.0393	1.89943	1.69563
16.501	52.4249	3.29868	1.84028	46.0902	7.93829	3.91534	51.7364	2.49698	2.01587	47.0141	8.15731	3.95773	52.1472	3.26025	1.86422		1.71	31.8839	2.0042	1.89368	0.34	79.5027	1.94377	1.7363
17.001	51.9884	3.49698	1.84888	45.2381	8.05811	4.12075	51.0973	2.60046	2.01878	46.1734	8.20775	4.21097	51.6916	3.45917	2.00379		1.76	32.9893	2.01948	1.99444	0.35	78.9698	1.98742	1.77642
17.501	51.5396	3.67447	1.95579	44.4017	8.16896	4.31975	50.4386	2.66514	2.08378	45.3686	8.27296	4.37003	51.2883	3.70163	1.94372		1.81	34.106	2.03099	2.10382	0.36	78.4404	2.03037	1.81599
18.001	51.1322	3.88504	1.91926	43.5808	8.27116	4.51102	49.8585	2.76938	2.06595	44.5779	8.3727	4.4819	50.8995	3.94998	1.92721		1.86	35.2251	2.06056	2.20127	0.37	77.9147	2.07264	1.85501
18.501	50.7472	4.10983	1.89714	42.7751	8.36505	4.68429	49.2686	2.86126	2.064	43.801	8.47632	4.58976	50.4689	4.14791	1.9873		1.91	36.3203	2.09977	2.28183	0.38	77.3926	2.11423	1.89349
19.001	50.4199	4.38427	1.83235	41.9842	8.45093	4.85223	48.6856	2.95814	2.12752	43.0377	8.57226	4.7015	50.0423	4.34151	2.04534		1.96	37.3937	2.14614	2.36552	0.39	76.874	2.15515	1.93144
19.501	50.126	4.68419	1.84568	41.208	8.52912	5.01481	48.1136	3.04563	2.18195	42.2873	8.66033	4.88099	49.6404	4.55143	2.06095		2.01	38.4592	2.18143	2.41846	0.4	76.3589	2.1954	1.96886
20.001	49.8353	4.97949	1.83882	40.4461	8.59991	5.11475	47.548	3.08784	2.236	41.5063	8.69761	5.08336	49.3406	4.8553	1.99775		2.06	39.5406	2.21788	2.46507	0.41	75.8472	2.23479	2.00596
																	2.11	40.632	2.27728	2.48849	0.42	75.3382	2.27286	2.0432
																	2.16	41.7154	2.3443	2.49638	0.43	74.8327	2.31026	2.07994
																	2.21	42.7551	2.39594	2.49797	0.44	74.3306	2.34701	2.11619
																	2.26	43.7827	2.4129	2.5288	0.45	73.8318	2.38312	2.15508
																	2.31	44.7981	2.42697	2.55717	0.46	73.3365	2.41858	2.1961
																	2.36	45.8012	2.43821	2.58992	0.47	72.8444	2.45342	2.23675
																	2.41	46.7921	2.44669	2.62673	0.48	72.3557	2.48762	2.27704
																	2.46	47.7697	2.4769	2.65201	0.49	71.8703	2.52121	2.31857
																	2.51	48.7125	2.51649	2.67576	0.5	71.3882	2.55419	2.35615
																	2.56	49.6428	2.53123	2.71971	0.51	70.9093	2.58656	2.3933
																	2.61	50.5795	2.53834	2.76349	0.52	70.4336	2.61834	2.43004
																	2.66	51.5049	2.54361	2.80832	0.53	69.9612	2.64952	2.46635
																	2.71	52.4177	2.54759	2.87947	0.54	69.4919	2.68012	2.50224
																	2.76	53.3038	2.54896	2.94709	0.55	69.0258	2.71015	2.53771
																	2.81	54.1684	2.53361	3.00697	0.56	68.5628	2.7396	2.57275
																	2.86	55.0214	2.50178	3.0406	0.57	68.1029	2.76849	2.60726
																	2.91	55.8628	2.46058	3.06853	0.58	67.6461	2.79682	2.63658
																	2.96	56.6929	2.41771	3.09441	0.59	67.1924	2.8246	2.66544
																	3.01	57.5118	2.37329	3.11822	0.6	66.7418	2.85184	2.69385
																	3.06	58.3196	2.32745	3.13999	0.61	66.2942	2.87854	2.72181
																	3.11	59.1166	2.2803	3.15971	0.62	65.8496	2.90471	2.74932
																	3.16	59.9029	2.24028	3.17741	0.63	65.408	2.93035	2.77639
																	3.21	60.6787	2.21606	3.22039	0.64	64.9693	2.95547	2.80303
																	3.26	61.4594	2.19054	3.23895	0.65	64.5336	2.98007	2.82924
																	3.31	62.2241	2.17898	3.22553	0.66	64.1009	3.00417	2.85501
																	3.36	62.98	2.16033	3.23371	0.67	63.671	3.02777	2.88037
																	3.41	63.7258	2.14252	3.23846	0.68	63.2441	3.05088	2.9053
																	3.46	64.4618	2.12782	3.24116	0.69	62.82	3.07349	2.92982
																	3.51	65.1882	2.10278	3.24712	0.7	62.3987	3.09562	2.95393
																	3.56	65.905	2.07678	3.25861	0.71	61.9803	3.11727	2.97763
																	3.61	66.6232	2.04775	3.26771	0.72	61.5647	3.13845	3.00094
																	3.66	67.3537	2.02868	3.26387	0.73	61.1519	3.15917	3.02384
																	3.71	68.0744	2.03042	3.23628	0.74	60.7419	3.17942	3.04635
																	3.76	68.7856	2.03086	3.20713	0.75	60.3346	3.19921	3.06847
																	3.81	69.4844	2.03297	3.17648	0.76	59.93	3.21856	3.0902
																	3.86	70.154	2.03856	3.14061	0.77	59.5282	3.23746	3.11155
																	3.91	70.8148	2.01812	3.11151	0.78	59.1291	3.25592	3.13252
																	3.96	71.467	1.99645	3.08141	0.79	58.7326	3.27395	3.15312
																	4.01	72.1109	1.9736	3.05033	0.8	58.3389	3.29155	3.17335
																	4.06	72.7465	1.9415	3.0183	0.81	57.9477	3.30873	3.19321
																	4.11	73.3741	1.90863	2.98535	0.82	57.5592	3.32549	3.21271
																	4.16	73.9937	1.87857	2.95149	0.83	57.1733	3.34183	3.23184
																	4.21	74.5956	1.84838	2.91676	0.84	56.79	3.35777	3.25063
																	4.26	75.1881	1.80744	2.89124	0.85	56.4092	3.37331	3.26906
																	4.31	75.7737	1.764	2.86673	0.86	56.0311	3.38849	3.28709
																	4.36	76.3579	1.72052	2.8421	0.87	55.6561	3.40393	3.30413
																	4.41	76.9377	1.66034	2.83327	0.88	55.2837	3.419	3.32082
																	4.46	77.511	1.62109	2.82	0.89	54.9138	3.43368	3.33716
																	4.51	78.0777	1.58184	2.80475	0.9	54.5464	3.44799	3.35317
																	4.56	78.6381	1.54261	2.78753	0.91	54.1814	3.46193	3.36884
																	4.61	79.1922	1.50345	2.76837	0.92	53.8189	3.47551	3.38504
																	4.66	79.7402	1.47195	2.74727	0.93	53.4589	3.48872	3.40119
																	4.71	80.2914	1.44336	2.72425	0.94	53.1013	3.50158	3.41701
																	4.76	80.8394	1.42355	2.69021	0.95	52.746	3.51409	3.43238
																	4.81	81.3762	1.40605	2.65166	0.96	52.3932	3.52625	3.44706
																	4.86	81.9029	1.3825	2.61673	0.97	52.0428	3.53807	3.46143
																	4.91	82.4465	1.34806	2.56985	0.98	51.6947	3.54955	3.47548
																	4.96	82.9702	1.336	2.4937	0.99	51.3489	3.56069	3.48923
																	5.01	83.4881	1.30964	2.4279	1	51.0055	3.57151	3.50268
																	5.06	84.0004	1.28289	2.34004	1.01	50.6644	3.58199	3.51583
																	5.11	84.5105	1.25577	2.25342	1.02	50.3256	3.59216	3.52868
																	5.16	85.0171	1.23509	2.16462	1.03	49.989	3.602	3.54123
																	5.21	85.5181	1.21987	2.07496	1.04	49.6547	3.61153	3.5535
																	5.26	86.0135	1.20359	2.00689	1.05	49.3227	3.62076	3.56547
																	5.31	86.5029	1.18624	1.94548	1.06	48.9929	3.62967	3.57717
																	5.36	86.9876	1.16752	1.88434	1.07	48.6653	3.63828	3.58858
																	5.41	87.4665	1.15021	1.82021	1.08	48.34	3.64659	3.59971
																	5.46	87.9402	1.13335	1.75318	1.09	48.0168	3.65461	3.61056
																	5.51	88.4086	1.11491	1.68674	1.1	47.6958	3.66233	3.62114
																	5.56	88.8718	1.08769	1.62199	1.11	47.3769	3.66977	3.63145
																	5.61	89.326	1.05972	1.55765	1.12	47.0602	3.67692	3.6415
																	5.66	89.7746	1.02709	1.49766	1.13	46.7456	3.68379	3.65128
																	5.71	90.2156	0.988341	1.43873	1.14	46.4331	3.69039	3.6608
																	5.76	90.6507	0.942668	1.3829	1.15	46.1227	3.69671	3.67006
																	5.81	91.0821	0.895918	1.32865	1.16	45.8145	3.70276	3.67906
																	5.86	91.5129	0.85306	1.27383	1.17	45.5082	3.70855	3.68782
																	5.91	91.9394	0.816555	1.21533	1.18	45.2041	3.71407	3.69632
																	5.96	92.3615	0.779941	1.15705	1.19	44.902	3.71933	3.70457
																	6.01	92.7795	0.743227	1.09899	1.2	44.6019	3.72433	3.71258
																	6.06	93.1934	0.70642	1.04117	1.21	44.3038	3.72908	3.72035
																	6.11	93.6031	0.67257	0.987834	1.22	44.0077	3.73359	3.72787
																	6.16	94.0116	0.638522	0.939159	1.23	43.7136	3.73784	3.73517
																	6.21	94.419	0.60676	0.879524	1.24	43.4215	3.74185	3.74222
																	6.26	94.8217	0.578549	0.817187	1.25	43.1314	3.74563	3.74905
																	6.31	95.2198	0.548984	0.755812	1.26	42.8432	3.74916	3.75538
																	6.36	95.6117	0.518078	0.695406	1.27	42.5569	3.75246	3.76148
																	6.41	95.9986	0.48417	0.637647	1.28	42.2726	3.75553	3.76735
																	6.46	96.3807	0.448425	0.584119	1.29	41.9901	3.75838	3.773
																	6.51	96.7579	0.411024	0.532406	1.3	41.7096	3.76099	3.77843
																	6.56	97.1315	0.371776	0.481512	1.31	41.4309	3.76339	3.78365
																	6.61	97.5011	0.332074	0.429756	1.32	41.1541	3.76557	3.78866
																	6.66	97.8665	0.291326	0.375376	1.33	40.8792	3.76753	3.79346
																	6.71	98.229	0.249452	0.322052	1.34	40.6061	3.76928	3.79805
																	6.76	98.5887	0.207642	0.268615	1.35	40.3349	3.77082	3.80244
																	6.81	98.9456	0.165909	0.215074	1.36	40.0654	3.77215	3.80662
																	6.86	99.2998	0.124324	0.161434	1.37	39.7978	3.77328	3.81061
																	6.91	99.6512	0.0829363	0.107704	1.38	39.532	3.77421	3.81439
																	6.96	100	0.04149	0.0539057	1.39	39.2679	3.77494	3.81799
																					1.4	39.0056	3.77547	3.82138
																					1.41	38.7451	3.77581	3.82459
																					1.42	38.4863	3.77596	3.82761
																					1.43	38.2293	3.77592	3.83045
																					1.44	37.974	3.77569	3.83309
																					1.45	37.7204	3.77529	3.83556
																					1.46	37.4685	3.7747	3.83785
																					1.47	37.2182	3.77394	3.83996
																					1.48	36.9697	3.773	3.84189
																					1.49	36.7228	3.77188	3.84504
																					1.5	36.4776	3.7706	3.84825
																					1.51	36.234	3.76915	3.85129
																					1.52	35.9921	3.76754	3.85416
																					1.53	35.7518	3.76576	3.85688
																					1.54	35.5131	3.76382	3.85943
																					1.55	35.276	3.76173	3.86182
																					1.56	35.0404	3.75947	3.86406
																					1.57	34.8065	3.75707	3.86613
																					1.58	34.5741	3.75451	3.86806
																					1.59	34.3433	3.75181	3.86983
																					1.6	34.114	3.74895	3.87144
																					1.61	33.8863	3.74596	3.87291
																					1.62	33.6601	3.74282	3.87423
																					1.63	33.4354	3.73954	3.87541
																					1.64	33.2122	3.73612	3.87644
																					1.65	32.9905	3.73257	3.87732
																					1.66	32.7703	3.72888	3.87807
																					1.67	32.5515	3.72506	3.87867
																					1.68	32.3342	3.72111	3.87914
																					1.69	32.1184	3.71703	3.87947
																					1.7	31.9041	3.71283	3.87966
																					1.71	31.6911	3.7085	3.87973
																					1.72	31.4796	3.70406	3.87965
																					1.73	31.2695	3.69949	3.87945
																					1.74	31.0608	3.6948	3.87912
																					1.75	30.8535	3.69	3.87866
																					1.76	30.6476	3.68508	3.87808
																					1.77	30.4431	3.68005	3.877
																					1.78	30.2399	3.67491	3.87502
																					1.79	30.0381	3.66966	3.87291
																					1.8	29.8377	3.6643	3.87069
																					1.81	29.6386	3.65884	3.86833
																					1.82	29.4408	3.65328	3.86586
																					1.83	29.2443	3.64761	3.86327
																					1.84	29.0492	3.64184	3.86057
																					1.85	28.8554	3.63597	3.85775
																					1.86	28.6628	3.63001	3.85481
																					1.87	28.4716	3.62395	3.85177
																					1.88	28.2816	3.6178	3.84861
																					1.89	28.0929	3.61156	3.84535
																					1.9	27.9055	3.60523	3.84197
																					1.91	27.7193	3.5988	3.83849
																					1.92	27.5344	3.59229	3.83491
																					1.93	27.3507	3.5857	3.83122
																					1.94	27.1682	3.57902	3.82743
																					1.95	26.987	3.57226	3.82354
																					1.96	26.8069	3.56541	3.81955
																					1.97	26.6281	3.55849	3.81546
																					1.98	26.4505	3.55149	3.81128
																					1.99	26.274	3.54441	3.807
																					2	26.0988	3.53726	3.80262
																					2.01	25.9247	3.53003	3.79816
																					2.02	25.7517	3.52273	3.7936
																					2.03	25.58	3.51536	3.78895
																					2.04	25.4094	3.50792	3.78422
																					2.05	25.2399	3.50041	3.77939
																					2.06	25.0715	3.49284	3.77448
																					2.07	24.9043	3.4852	3.76949
																					2.08	24.7382	3.47749	3.76441
																					2.09	24.5732	3.46972	3.75925
																					2.1	24.4093	3.46189	3.75401
																					2.11	24.2465	3.454	3.74868
																					2.12	24.0848	3.44605	3.74328
																					2.13	23.9242	3.43804	3.7378
																					2.14	23.7646	3.42997	3.73225
																					2.15	23.6061	3.42185	3.72662
																					2.16	23.4487	3.41367	3.72091
																					2.17	23.2923	3.40544	3.71513
																					2.18	23.137	3.39716	3.70928
																					2.19	22.9827	3.38882	3.70336
																					2.2	22.8295	3.38044	3.69737
																					2.21	22.6772	3.37201	3.69131
																					2.22	22.526	3.36353	3.68518
																					2.23	22.3758	3.355	3.67898
																					2.24	22.2266	3.34643	3.67272
																					2.25	22.0784	3.33781	3.6664
																					2.26	21.9312	3.32915	3.66001
																					2.27	21.7849	3.32044	3.65356
																					2.28	21.6397	3.3117	3.64704
																					2.29	21.4954	3.30291	3.64047
																					2.3	21.3521	3.29409	3.63384
																					2.31	21.2097	3.28523	3.62715
																					2.32	21.0683	3.27632	3.6204
																					2.33	20.9278	3.26739	3.61359
																					2.34	20.7883	3.25841	3.60673
																					2.35	20.6497	3.24941	3.59981
																					2.36	20.5121	3.24037	3.59285
																					2.37	20.3753	3.23129	3.58582
																					2.38	20.2395	3.22219	3.57875
																					2.39	20.1046	3.21305	3.57162
																					2.4	19.9705	3.20388	3.56348
																					2.41	19.8374	3.19469	3.55517
																					2.42	19.7052	3.18546	3.54683
																					2.43	19.5738	3.17621	3.53845
																					2.44	19.4433	3.16693	3.53003
																					2.45	19.3137	3.15763	3.52157
																					2.46	19.185	3.1483	3.51308
																					2.47	19.0571	3.13894	3.50455
																					2.48	18.9301	3.12957	3.49599
																					2.49	18.8039	3.12017	3.4874
																					2.5	18.6785	3.11075	3.47877
																					2.51	18.5541	3.1013	3.47011
																					2.52	18.4304	3.09184	3.46143
																					2.53	18.3075	3.08236	3.45271
																					2.54	18.1855	3.07286	3.44396
																					2.55	18.0643	3.06334	3.43518
																					2.56	17.9439	3.0538	3.42637
																					2.57	17.8243	3.04425	3.41754
																					2.58	17.7055	3.03468	3.40868
																					2.59	17.5875	3.0251	3.39979
																					2.6	17.4703	3.0155	3.39088
																					2.61	17.3539	3.00589	3.38195
																					2.62	17.2382	2.99626	3.37299
																					2.63	17.1234	2.98662	3.36401
																					2.64	17.0093	2.97697	3.355
																					2.65	16.8959	2.96731	3.34598
																					2.66	16.7833	2.95764	3.33693
																					2.67	16.6715	2.94796	3.32786
																					2.68	16.5604	2.93827	3.31877
																					2.69	16.45	2.92857	3.30967
																					2.7	16.3404	2.91886	3.30054
																					2.71	16.2315	2.90915	3.2914
																					2.72	16.1234	2.89943	3.28224
																					2.73	16.0159	2.8897	3.27306
																					2.74	15.9092	2.87996	3.26386
																					2.75	15.8032	2.87022	3.25466
																					2.76	15.6979	2.86048	3.24543
																					2.77	15.5933	2.85073	3.23619
																					2.78	15.4894	2.84098	3.22694
																					2.79	15.3862	2.83122	3.21767
																					2.8	15.2837	2.82147	3.2084
																					2.81	15.1819	2.81171	3.19911
																					2.82	15.0807	2.80195	3.1898
																					2.83	14.9803	2.79218	3.18049
																					2.84	14.8805	2.78242	3.17117
																					2.85	14.7813	2.77266	3.16183
																					2.86	14.6829	2.7629	3.15249
																					2.87	14.585	2.75314	3.14314
																					2.88	14.4879	2.74338	3.13378
																					2.89	14.3914	2.73362	3.12441
																					2.9	14.2955	2.72386	3.11503
																					2.91	14.2003	2.71411	3.10565
																					2.92	14.1057	2.70436	3.09626
																					2.93	14.0117	2.69461	3.08686
																					2.94	13.9184	2.68487	3.07746
																					2.95	13.8257	2.67513	3.06805
																					2.96	13.7336	2.6654	3.05864
																					2.97	13.6421	2.65567	3.04922
																					2.98	13.5512	2.64595	3.0398
																					2.99	13.4609	2.63624	3.03038
																					3	13.3713	2.62653	3.02095
																					3.01	13.2822	2.61683	3.01152
																					3.02	13.1938	2.60713	3.00209
																					3.03	13.1059	2.59745	2.99266
																					3.04	13.0186	2.58777	2.98323
																					3.05	12.9319	2.5781	2.97379
																					3.06	12.8458	2.56844	2.96436
																					3.07	12.7602	2.55878	2.95492
																					3.08	12.6752	2.54914	2.94549
																					3.09	12.5908	2.53951	2.93605
																					3.1	12.507	2.52989	2.92662
																					3.11	12.4237	2.52027	2.91719
																					3.12	12.3409	2.51067	2.90776
																					3.13	12.2587	2.50108	2.89833
																					3.14	12.1771	2.4915	2.88891
																					3.15	12.096	2.48193	2.87948
																					3.16	12.0155	2.47238	2.87006
																					3.17	11.9354	2.46284	2.86065
																					3.18	11.856	2.45331	2.85124
																					3.19	11.777	2.44379	2.84183
																					3.2	11.6986	2.43429	2.83243
																					3.21	11.6207	2.42479	2.82303
																					3.22	11.5433	2.41532	2.81364
																					3.23	11.4664	2.40586	2.80425
																					3.24	11.3901	2.39641	2.79487
																					3.25	11.3143	2.38697	2.78549
																					3.26	11.2389	2.37756	2.77612
																					3.27	11.1641	2.36815	2.76676
																					3.28	11.0898	2.35876	2.75741
																					3.29	11.0159	2.34939	2.74806
																					3.3	10.9426	2.34004	2.73872
																					3.31	10.8697	2.3307	2.72939
																					3.32	10.7974	2.32137	2.72007
																					3.33	10.7255	2.31206	2.71075
																					3.34	10.6541	2.30277	2.7017
																					3.35	10.5831	2.2935	2.69284
																					3.36	10.5127	2.28424	2.684
																					3.37	10.4427	2.275	2.67515
																					3.38	10.3732	2.26578	2.66631
																					3.39	10.3041	2.25658	2.65748
																					3.4	10.2355	2.2474	2.64866
																					3.41	10.1674	2.23823	2.63984
																					3.42	10.0997	2.22908	2.63102
																					3.43	10.0325	2.21995	2.62222
																					3.44	9.96568	2.21084	2.61342
																					3.45	9.89934	2.20175	2.60462
																					3.46	9.83345	2.19268	2.59584
																					3.47	9.76799	2.18362	2.58706
																					3.48	9.70297	2.17459	2.57829
																					3.49	9.63838	2.16557	2.56953
																					3.5	9.57423	2.15658	2.56078
																					3.51	9.5105	2.14761	2.55204
																					3.52	9.4472	2.13865	2.5433
																					3.53	9.38432	2.12972	2.53458
																					3.54	9.32186	2.12081	2.52586
																					3.55	9.25982	2.11192	2.51716
																					3.56	9.19819	2.10305	2.50846
																					3.57	9.13697	2.0942	2.49978
																					3.58	9.07616	2.08537	2.4911
																					3.59	9.01575	2.07656	2.48244
																					3.6	8.95575	2.06777	2.47379
																					3.61	8.89615	2.05901	2.46514
																					3.62	8.83694	2.05027	2.45651
																					3.63	8.77813	2.04154	2.44789
																					3.64	8.71972	2.03285	2.43928
																					3.65	8.66169	2.02417	2.43069
																					3.66	8.60405	2.01551	2.4221
																					3.67	8.54679	2.00688	2.41353
																					3.68	8.48992	1.99827	2.40497
																					3.69	8.43342	1.98968	2.39642
																					3.7	8.3773	1.98112	2.38789
																					3.71	8.32156	1.97258	2.37936
																					3.72	8.26618	1.96406	2.37086
																					3.73	8.21118	1.95556	2.36236
																					3.74	8.15654	1.94709	2.35388
																					3.75	8.10227	1.93864	2.34541
																					3.76	8.04836	1.93021	2.33695
																					3.77	7.99481	1.9218	2.32851
																					3.78	7.94161	1.91342	2.32008
																					3.79	7.88877	1.90507	2.31167
																					3.8	7.83629	1.89673	2.30327
																					3.81	7.78415	1.88842	2.29489
																					3.82	7.73236	1.88014	2.28652
																					3.83	7.68092	1.87187	2.27816
																					3.84	7.62981	1.86364	2.26982
																					3.85	7.57905	1.85542	2.2615
																					3.86	7.52863	1.84723	2.25319
																					3.87	7.47855	1.83906	2.2449
																					3.88	7.42879	1.83092	2.23662
																					3.89	7.37937	1.8228	2.22835
																					3.9	7.33028	1.81471	2.22011
																					3.91	7.28152	1.80664	2.21187
																					3.92	7.23308	1.79859	2.20366
																					3.93	7.18496	1.79057	2.19546
																					3.94	7.13717	1.78258	2.18728
																					3.95	7.08969	1.7746	2.17911
																					3.96	7.04253	1.76666	2.17096
																					3.97	6.99569	1.75873	2.16282
																					3.98	6.94915	1.75084	2.15471
																					3.99	6.90293	1.74296	2.14661
																					4	6.85701	1.73511	2.13852
																					4.01	6.81141	1.72729	2.13046
																					4.02	6.7661	1.71949	2.12241
																					4.03	6.7211	1.71172	2.11438
																					4.04	6.67639	1.70397	2.10636
																					4.05	6.63199	1.69624	2.09836
																					4.06	6.58788	1.68854	2.09038
																					4.07	6.54406	1.68087	2.08242
																					4.08	6.50054	1.67322	2.07448
																					4.09	6.45731	1.6656	2.06655
																					4.1	6.41436	1.658	2.05864
																					4.11	6.3717	1.65042	2.05075
																					4.12	6.32933	1.64287	2.04288
																					4.13	6.28724	1.63535	2.03502
																					4.14	6.24543	1.62785	2.02719
																					4.15	6.20389	1.62038	2.01937
																					4.16	6.16264	1.61293	2.01157
																					4.17	6.12166	1.60551	2.00379
																					4.18	6.08095	1.59811	1.99602
																					4.19	6.04051	1.59071	1.98828
																					4.2	6.00035	1.58332	1.98056
																					4.21	5.96045	1.57596	1.97285
																					4.22	5.92081	1.56862	1.96516
																					4.23	5.88144	1.56131	1.95749
																					4.24	5.84234	1.55402	1.94984
																					4.25	5.80349	1.54676	1.94221
																					4.26	5.7649	1.53952	1.9346
																					4.27	5.72657	1.53232	1.92701
																					4.28	5.6885	1.52513	1.91943
																					4.29	5.65067	1.51797	1.91188
																					4.3	5.6131	1.51084	1.90434
																					4.31	5.57579	1.50374	1.89683
																					4.32	5.53871	1.49666	1.88933
																					4.33	5.50189	1.4896	1.88185
																					4.34	5.46531	1.48257	1.8744
																					4.35	5.42898	1.47557	1.86696
																					4.36	5.39289	1.46859	1.85954
																					4.37	5.35703	1.46164	1.85214
																					4.38	5.32142	1.45471	1.84476
																					4.39	5.28605	1.44781	1.8374
																					4.4	5.25091	1.44094	1.83006
																					4.41	5.216	1.43409	1.82275
																					4.42	5.18133	1.42726	1.81545
																					4.43	5.14688	1.42047	1.80817
																					4.44	5.11267	1.41369	1.80091
																					4.45	5.07869	1.40695	1.79367
																					4.46	5.04493	1.40023	1.78645
																					4.47	5.01139	1.39353	1.77925
																					4.48	4.97808	1.38686	1.77207
																					4.49	4.94499	1.38021	1.76491
																					4.5	4.91213	1.37359	1.75777
																					4.51	4.87948	1.367	1.75065
																					4.52	4.84704	1.36043	1.74355
																					4.53	4.81483	1.35389	1.73647
																					4.54	4.78283	1.34737	1.72942
																					4.55	4.75104	1.34087	1.72238
																					4.56	4.71946	1.33441	1.71536
																					4.57	4.6881	1.32796	1.70836
																					4.58	4.65694	1.32155	1.70139
																					4.59	4.62599	1.31515	1.69443
																					4.6	4.59525	1.30879	1.68749
																					4.61	4.56471	1.30244	1.68058
																					4.62	4.53437	1.29612	1.67368
																					4.63	4.50424	1.28983	1.66681
																					4.64	4.47431	1.28356	1.65995
																					4.65	4.44458	1.27732	1.65312
																					4.66	4.41504	1.2711	1.64631
																					4.67	4.3857	1.26491	1.63951
																					4.68	4.35656	1.25874	1.63274
																					4.69	4.32761	1.2526	1.62599
																					4.7	4.29885	1.24648	1.61926
																					4.71	4.27029	1.24038	1.61255
																					4.72	4.24192	1.23431	1.60585
																					4.73	4.21373	1.22827	1.59918
																					4.74	4.18573	1.22224	1.59254
																					4.75	4.15792	1.21625	1.58591
																					4.76	4.1303	1.21027	1.5793
																					4.77	4.10285	1.20433	1.57271
																					4.78	4.07559	1.1984	1.56614
																					4.79	4.04852	1.1925	1.5596
																					4.8	4.02162	1.18663	1.55307
																					4.81	3.9949	1.18078	1.54657
																					4.82	3.96836	1.17495	1.54003
																					4.83	3.942	1.16914	1.5335
																					4.84	3.91581	1.16336	1.52698
																					4.85	3.88979	1.15761	1.52048
																					4.86	3.86395	1.15188	1.51401
																					4.87	3.83828	1.14617	1.50756
																					4.88	3.81279	1.14049	1.50113
																					4.89	3.78746	1.13482	1.49472
																					4.9	3.7623	1.12919	1.48833
																					4.91	3.73731	1.12357	1.48196
																					4.92	3.71248	1.11798	1.47561
																					4.93	3.68782	1.11242	1.46929
																					4.94	3.66332	1.10688	1.46298
																					4.95	3.63899	1.10136	1.4567
																					4.96	3.61482	1.09586	1.45044
																					4.97	3.59081	1.09039	1.4442
																					4.98	3.56696	1.08494	1.43798
																					4.99	3.54327	1.07951	1.43178
																					5	3.51973	1.07411	1.4256
																					5.01	3.49636	1.06873	1.41945
																					5.02	3.47314	1.06337	1.41331
																					5.03	3.45007	1.05804	1.4072
																					5.04	3.42715	1.05272	1.4011
																					5.05	3.40439	1.04743	1.39503
																					5.06	3.38178	1.04217	1.38898
																					5.07	3.35933	1.03692	1.38295
																					5.08	3.33702	1.0317	1.37694
																					5.09	3.31485	1.02651	1.37095
																					5.1	3.29284	1.02133	1.36498
																					5.11	3.27097	1.01618	1.35904
																					5.12	3.24925	1.01105	1.35311
																					5.13	3.22768	1.00594	1.3472
																					5.14	3.20624	1.00085	1.34132
																					5.15	3.18495	0.995786	1.33546
																					5.16	3.1638	0.990743	1.32969
																					5.17	3.1428	0.985723	1.32415
																					5.18	3.12193	0.980725	1.31863
																					5.19	3.1012	0.975749	1.31313
																					5.2	3.08061	0.970794	1.30764
																					5.21	3.06015	0.965862	1.30218
																					5.22	3.03983	0.960951	1.29673
																					5.23	3.01965	0.956062	1.2913
																					5.24	2.9996	0.951194	1.28588
																					5.25	2.97969	0.946348	1.28049
																					5.26	2.9599	0.941524	1.27511
																					5.27	2.94025	0.936721	1.26975
																					5.28	2.92073	0.931939	1.26441
																					5.29	2.90134	0.927178	1.25909
																					5.3	2.88208	0.922439	1.25379
																					5.31	2.86294	0.917721	1.2485
																					5.32	2.84394	0.913024	1.24323
																					5.33	2.82506	0.908348	1.23798
																					5.34	2.8063	0.903693	1.23275
																					5.35	2.78768	0.899059	1.22753
																					5.36	2.76917	0.894446	1.22233
																					5.37	2.75079	0.889853	1.21716
																					5.38	2.73253	0.885281	1.21199
																					5.39	2.71439	0.88073	1.20685
																					5.4	2.69637	0.8762	1.20172
																					5.41	2.67847	0.87169	1.19662
																					5.42	2.66069	0.8672	1.19152
																					5.43	2.64303	0.862731	1.18645
																					5.44	2.62549	0.858282	1.1814
																					5.45	2.60806	0.853853	1.17636
																					5.46	2.59075	0.849445	1.17134
																					5.47	2.57356	0.845056	1.16634
																					5.48	2.55648	0.840688	1.16135
																					5.49	2.53951	0.836339	1.15638
																					5.5	2.52266	0.832011	1.15143
																					5.51	2.50591	0.827702	1.1465
																					5.52	2.48928	0.823413	1.14158
																					5.53	2.47276	0.819144	1.13669
																					5.54	2.45635	0.814895	1.1318
																					5.55	2.44005	0.810665	1.12694
																					5.56	2.42386	0.806455	1.1221
																					5.57	2.40777	0.802264	1.11727
																					5.58	2.39179	0.798092	1.11245
																					5.59	2.37592	0.79394	1.10766
																					5.6	2.36016	0.789807	1.10288
																					5.61	2.34449	0.785693	1.09812
																					5.62	2.32894	0.781598	1.09338
																					5.63	2.31348	0.777523	1.08865
																					5.64	2.29813	0.773466	1.08395
																					5.65	2.28288	0.769428	1.07925
																					5.66	2.26774	0.765409	1.07458
																					5.67	2.25269	0.761409	1.06992
																					5.68	2.23774	0.757428	1.06528
																					5.69	2.22289	0.753465	1.06066
																					5.7	2.20815	0.749521	1.05605
																					5.71	2.1935	0.745595	1.05146
																					5.72	2.17894	0.741688	1.04688
																					5.73	2.16449	0.737799	1.04233
																					5.74	2.15013	0.733929	1.03779
																					5.75	2.13586	0.730076	1.03326
																					5.76	2.12169	0.726242	1.02876
																					5.77	2.10762	0.722426	1.02427
																					5.78	2.09363	0.718628	1.01979
																					5.79	2.07974	0.714848	1.01534
																					5.8	2.06595	0.711086	1.0109
																					5.81	2.05224	0.707342	1.00647
																					5.82	2.03863	0.703615	1.00206
																					5.83	2.0251	0.699907	0.997672
																					5.84	2.01167	0.696216	0.993297
																					5.85	1.99833	0.692542	0.988938
																					5.86	1.98507	0.688886	0.984596
																					5.87	1.9719	0.685248	0.980269
																					5.88	1.95882	0.681627	0.975959
																					5.89	1.94583	0.678023	0.971666
																					5.9	1.93292	0.674436	0.967388
																					5.91	1.9201	0.670867	0.963126
																					5.92	1.90737	0.667315	0.958881
																					5.93	1.89472	0.663779	0.954652
																					5.94	1.88215	0.660261	0.950438
																					5.95	1.86967	0.65676	0.94624
																					5.96	1.85727	0.653275	0.942059
																					5.97	1.84495	0.649808	0.937893
																					5.98	1.83271	0.646357	0.933743
																					5.99	1.82056	0.642923	0.929609
																					6	1.80849	0.639505	0.925491
																					6.01	1.79649	0.636104	0.921388
																					6.02	1.78458	0.632719	0.917301
																					6.03	1.77274	0.629351	0.91323
																					6.04	1.76099	0.625999	0.909174
																					6.05	1.74931	0.622663	0.905134
																					6.06	1.73771	0.619344	0.901109
																					6.07	1.72619	0.616041	0.8971
																					6.08	1.71474	0.612753	0.893107
																					6.09	1.70337	0.609482	0.889128
																					6.1	1.69208	0.606227	0.885165
																					6.11	1.68086	0.602988	0.881218
																					6.12	1.66971	0.599764	0.877286
																					6.13	1.65864	0.596556	0.873369
																					6.14	1.64764	0.593364	0.869467
																					6.15	1.63672	0.590188	0.86558
																					6.16	1.62587	0.587027	0.861709
																					6.17	1.61509	0.583882	0.857852
																					6.18	1.60438	0.580752	0.854011
																					6.19	1.59374	0.577637	0.850184
																					6.2	1.58317	0.574538	0.846373
																					6.21	1.57268	0.571454	0.842577
																					6.22	1.56225	0.568385	0.838795
																					6.23	1.55189	0.565332	0.835028
																					6.24	1.54161	0.562293	0.831276
																					6.25	1.53139	0.55927	0.827539
																					6.26	1.52123	0.556261	0.823817
																					6.27	1.51115	0.553267	0.820109
																					6.28	1.50113	0.550288	0.816416
																					6.29	1.49118	0.547324	0.812737
																					6.3	1.4813	0.544375	0.809073
																					6.31	1.47148	0.54144	0.805424
																					6.32	1.46172	0.53852	0.801789
																					6.33	1.45203	0.535614	0.798168
																					6.34	1.44241	0.532723	0.794562
																					6.35	1.43285	0.529846	0.790971
																					6.36	1.42335	0.526983	0.787393
																					6.37	1.41392	0.524135	0.78383
																					6.38	1.40455	0.521301	0.780281
																					6.39	1.39524	0.518481	0.776747
																					6.4	1.38599	0.515675	0.773226
																					6.41	1.3768	0.512883	0.76972
																					6.42	1.36768	0.510106	0.766227
																					6.43	1.35861	0.507342	0.762749
																					6.44	1.34961	0.504592	0.759285
																					6.45	1.34066	0.501855	0.755834
																					6.46	1.33178	0.499133	0.752398
																					6.47	1.32295	0.496424	0.748975
																					6.48	1.31419	0.493729	0.745566
																					6.49	1.30548	0.491047	0.742171
																					6.5	1.29683	0.488379	0.73879
																					6.51	1.28823	0.485724	0.735423
																					6.52	1.27969	0.483083	0.732069
																					6.53	1.27121	0.480455	0.728664
																					6.54	1.26279	0.47784	0.725201
																					6.55	1.25442	0.475238	0.721733
																					6.56	1.24611	0.47265	0.71828
																					6.57	1.23785	0.470075	0.714842
																					6.58	1.22965	0.467512	0.711419
																					6.59	1.2215	0.464963	0.708011
																					6.6	1.21341	0.462427	0.704618
																					6.61	1.20537	0.459903	0.701239
																					6.62	1.19738	0.457393	0.697876
																					6.63	1.18945	0.454895	0.694526
																					6.64	1.18157	0.452409	0.691192
																					6.65	1.17374	0.449937	0.687872
																					6.66	1.16596	0.447477	0.684566
																					6.67	1.15824	0.445029	0.681275
																					6.68	1.15057	0.442594	0.677999
																					6.69	1.14294	0.440172	0.674736
																					6.7	1.13537	0.437761	0.671488
																					6.71	1.12785	0.435363	0.668255
																					6.72	1.12038	0.432978	0.665035
																					6.73	1.11296	0.430604	0.66183
																					6.74	1.10558	0.428243	0.658639
																					6.75	1.09826	0.425894	0.655461
																					6.76	1.09098	0.423556	0.652298
																					6.77	1.08376	0.421231	0.649149
																					6.78	1.07658	0.418918	0.646014
																					6.79	1.06945	0.416616	0.642892
																					6.8	1.06236	0.414327	0.639784
																					6.81	1.05533	0.412049	0.63669
																					6.82	1.04834	0.409783	0.63361
																					6.83	1.04139	0.407528	0.630543
																					6.84	1.03449	0.405286	0.62749
																					6.85	1.02764	0.403054	0.62445
																					6.86	1.02084	0.400834	0.621424
																					6.87	1.01407	0.398626	0.618412
																					6.88	1.00736	0.396429	0.615413
																					6.89	1.00069	0.394244	0.612427
																					6.9	0.994058	0.392069	0.609454
																					6.91	0.987474	0.389906	0.606495
																					6.92	0.980935	0.387754	0.603549
																					6.93	0.974438	0.385614	0.600616
																					6.94	0.967985	0.383484	0.597696
																					6.95	0.961574	0.381365	0.594789
																					6.96	0.955206	0.379258	0.591896
																					6.97	0.94888	0.377161	0.589015
																					6.98	0.942597	0.375075	0.586147
																					6.99	0.936355	0.373	0.583292
																					7	0.930154	0.370936	0.580449
																					7.01	0.923994	0.368883	0.57762
																					7.02	0.917876	0.36684	0.574803
																					7.03	0.911798	0.364808	0.571999
																					7.04	0.90576	0.362786	0.569207
																					7.05	0.899763	0.360775	0.566428
																					7.06	0.893805	0.358775	0.563662
																					7.07	0.887887	0.356785	0.560908
																					7.08	0.882008	0.354805	0.558166
																					7.09	0.876168	0.352836	0.555437
																					7.1	0.870367	0.350877	0.55272
																					7.11	0.864604	0.348928	0.550015
																					7.12	0.858879	0.346989	0.547323
																					7.13	0.853193	0.345061	0.544643
																					7.14	0.847544	0.343142	0.541975
																					7.15	0.841933	0.341234	0.539319
																					7.16	0.836359	0.339336	0.536675
																					7.17	0.830822	0.337447	0.534043
																					7.18	0.825321	0.335569	0.531423
																					7.19	0.819857	0.333701	0.528815
																					7.2	0.81443	0.331842	0.526219
																					7.21	0.809038	0.329993	0.523635
																					7.22	0.803683	0.328154	0.521062
																					7.23	0.798362	0.326324	0.518501
																					7.24	0.793077	0.324504	0.515952
																					7.25	0.787827	0.322694	0.513414
																					7.26	0.782612	0.320893	0.510888
																					7.27	0.777432	0.319102	0.508374
																					7.28	0.772286	0.31732	0.505871
																					7.29	0.767174	0.315548	0.503379
																					7.3	0.762096	0.313785	0.500899
																					7.31	0.757051	0.312031	0.49843
																					7.32	0.75204	0.310287	0.495973
																					7.33	0.747063	0.308551	0.493527
																					7.34	0.742118	0.306825	0.491092
																					7.35	0.737206	0.305108	0.488668
																					7.36	0.732327	0.303401	0.486256
																					7.37	0.72748	0.301702	0.483854
																					7.38	0.722665	0.300012	0.481464
																					7.39	0.717882	0.298331	0.479084
																					7.4	0.713131	0.29666	0.476716
																					7.41	0.708411	0.294997	0.474358
																					7.42	0.703723	0.293343	0.472011
																					7.43	0.699066	0.291697	0.469675
																					7.44	0.69444	0.290061	0.46735
																					7.45	0.689844	0.288433	0.465036
																					7.46	0.685279	0.286814	0.462731
																					7.47	0.68075	0.285209	0.460433
																					7.48	0.67625	0.283613	0.458145
																					7.49	0.671781	0.282025	0.455868
																					7.5	0.667341	0.280445	0.453601
																					7.51	0.66293	0.278873	0.451345
																					7.52	0.658549	0.27731	0.4491
																					7.53	0.654196	0.275756	0.446865
																					7.54	0.649873	0.274209	0.44464
																					7.55	0.645578	0.272671	0.442426
																					7.56	0.641311	0.271141	0.440222
																					7.57	0.637073	0.269619	0.438028
																					7.58	0.632863	0.268106	0.435845
																					7.59	0.628681	0.2666	0.433672
																					7.6	0.624526	0.265102	0.431509
																					7.61	0.620399	0.263613	0.429356
																					7.62	0.616299	0.262131	0.427214
																					7.63	0.612227	0.260657	0.425081
																					7.64	0.608181	0.259191	0.422958
																					7.65	0.604162	0.257733	0.420845
																					7.66	0.60017	0.256283	0.418743
																					7.67	0.596204	0.254841	0.41665
																					7.68	0.592264	0.253406	0.414567
																					7.69	0.588351	0.251979	0.412493
																					7.7	0.584463	0.250559	0.41043
																					7.71	0.580602	0.249147	0.408376
																					7.72	0.576765	0.247743	0.406331
																					7.73	0.572955	0.246346	0.404297
																					7.74	0.569169	0.244957	0.402272
																					7.75	0.565409	0.243575	0.400256
																					7.76	0.561673	0.242201	0.39825
																					7.77	0.557962	0.240834	0.396254
																					7.78	0.554276	0.239474	0.394267
																					7.79	0.550614	0.238122	0.392289
																					7.8	0.546976	0.236777	0.390321
																					7.81	0.543362	0.235439	0.388362
																					7.82	0.539773	0.234108	0.386413
																					7.83	0.536207	0.232785	0.384472
																					7.84	0.532664	0.231469	0.382541
																					7.85	0.529146	0.230159	0.380619
																					7.86	0.52565	0.228857	0.378706
																					7.87	0.522178	0.227562	0.376802
																					7.88	0.518728	0.226274	0.374907
																					7.89	0.515302	0.224993	0.373021
																					7.9	0.511898	0.223719	0.371144
																					7.91	0.508516	0.222451	0.369276
																					7.92	0.505157	0.221191	0.367417
																					7.93	0.501821	0.219937	0.365566
																					7.94	0.498506	0.21869	0.363725
																					7.95	0.495213	0.21745	0.361892
																					7.96	0.491942	0.216217	0.360068
																					7.97	0.488693	0.21499	0.358253
																					7.98	0.485465	0.21377	0.356446
																					7.99	0.482259	0.212557	0.354648
																					8	0.479074	0.21135	0.352858

[truncated: 2 more sheets: Figure S5-2, FIGURE S5-3]
