# Supplementary material for: Identification and dynamics of the human ZDHHC16-ZDHHC6 palmitoylation cascade
Source: eLife journal article supplement (doi:10.7554/elife.27826), 2017-08-15
Supplement: supp [file elife-27826-supp-v1.zip]

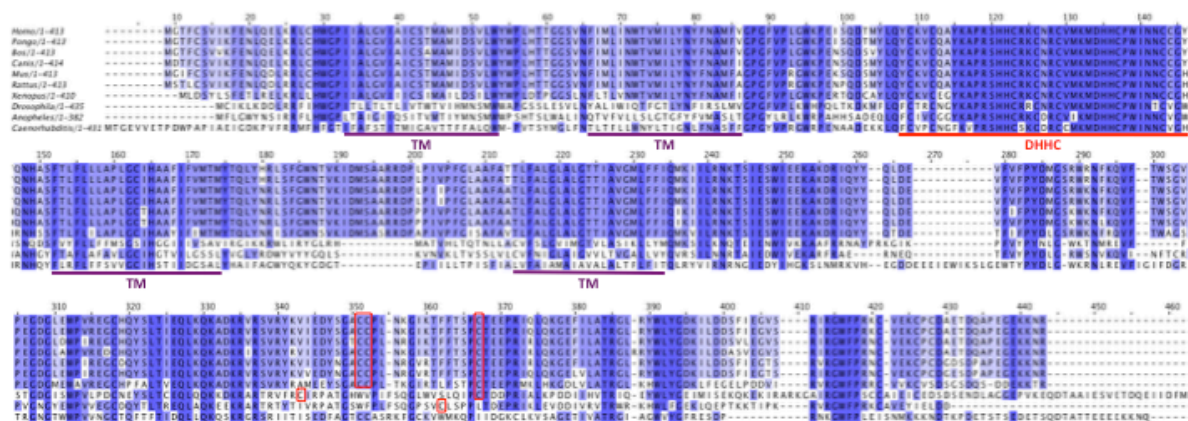

SH2\_2 Domain

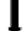

Multiple sequence alignment of SH2 domain proteins across various species. The alignment is shown in two parts, with the first part highlighting the SH2 domain structure and the second part showing the SH2 domain sequence.

**SH2 Domain Structure:**

- TM (Transmembrane) domain: Residues 10-140
- SH2 domain: Residues 140-280
- DHHC (Dual Homology Homocysteine) domain: Residues 280-300

**SH2 Domain Sequence:**

SH2 Domain (Residues 140-280):

```

Homo/1-413  -----MCTFCVSVKFNQGLKALCHNCPYIALCVAIICSTWAMIDSVLYWFLHTTGGSVNFIMLINTVMILYNYFNAMVFCGPFVLDKPFISQDTHMLOVEYVDQAKAPKSIHHCRRKNCVKVMKDHHCNFINNCCGV
Pongo/1-413 -----MCTFCVSVKFNQGLKALCHNCPYIALCVAIICSTWAMIDSVLYWFLHTTGGSVNFIMLINTVMILYNYFNAMVFCGPFVLDKPFISQDTHMLOVEYVDQAKAPKSIHHCRRKNCVKVMKDHHCNFINNCCGV
Bos/1-413  -----MCTFCVSVKFNQGLKALCHNCPYIALCVAIICSTWAMIDSVLYWFLHTTGGSVNFIMLINTVMILYNYFNAMVFCGPFVLDKPFISQDTHMLOVEYVDQAKAPKSIHHCRRKNCVKVMKDHHCNFINNCCGV
Canis/1-414 -----MCTFCVSVKFNQGLKALCHNCPYIALCVAIICSTWAMIDSVLYWFLHTTGGSVNFIMLINTVMILYNYFNAMVFCGPFVLDKPFISQDTHMLOVEYVDQAKAPKSIHHCRRKNCVKVMKDHHCNFINNCCGV
Mus/1-413  -----MCTFCVSVKFNQGLKALCHNCPYIALCVAIICSTWAMIDSVLYWFLHTTGGSVNFIMLINTVMILYNYFNAMVFCGPFVLDKPFISQDTHMLOVEYVDQAKAPKSIHHCRRKNCVKVMKDHHCNFINNCCGV
Rattus/1-413 -----MCTFCVSVKFNQGLKALCHNCPYIALCVAIICSTWAMIDSVLYWFLHTTGGSVNFIMLINTVMILYNYFNAMVFCGPFVLDKPFISQDTHMLOVEYVDQAKAPKSIHHCRRKNCVKVMKDHHCNFINNCCGV
Xenopus/1-420 -----MCTFCVSVKFNQGLKALCHNCPYIALCVAIICSTWAMIDSVLYWFLHTTGGSVNFIMLINTVMILYNYFNAMVFCGPFVLDKPFISQDTHMLOVEYVDQAKAPKSIHHCRRKNCVKVMKDHHCNFINNCCGV
Drosophila/1-435 -----MCTFCVSVKFNQGLKALCHNCPYIALCVAIICSTWAMIDSVLYWFLHTTGGSVNFIMLINTVMILYNYFNAMVFCGPFVLDKPFISQDTHMLOVEYVDQAKAPKSIHHCRRKNCVKVMKDHHCNFINNCCGV
Anopheles/1-382 -----MCTFCVSVKFNQGLKALCHNCPYIALCVAIICSTWAMIDSVLYWFLHTTGGSVNFIMLINTVMILYNYFNAMVFCGPFVLDKPFISQDTHMLOVEYVDQAKAPKSIHHCRRKNCVKVMKDHHCNFINNCCGV
Caenorhabditis/1-431 -----MCTFCVSVKFNQGLKALCHNCPYIALCVAIICSTWAMIDSVLYWFLHTTGGSVNFIMLINTVMILYNYFNAMVFCGPFVLDKPFISQDTHMLOVEYVDQAKAPKSIHHCRRKNCVKVMKDHHCNFINNCCGV

```
