# Supplementary figures and images for: Identification and dynamics of the human ZDHHC16-ZDHHC6 palmitoylation cascade
Source: eLife journal article supplement (doi:10.7554/elife.27826), 2017-08-15

Fig. 4-figure supplement 1

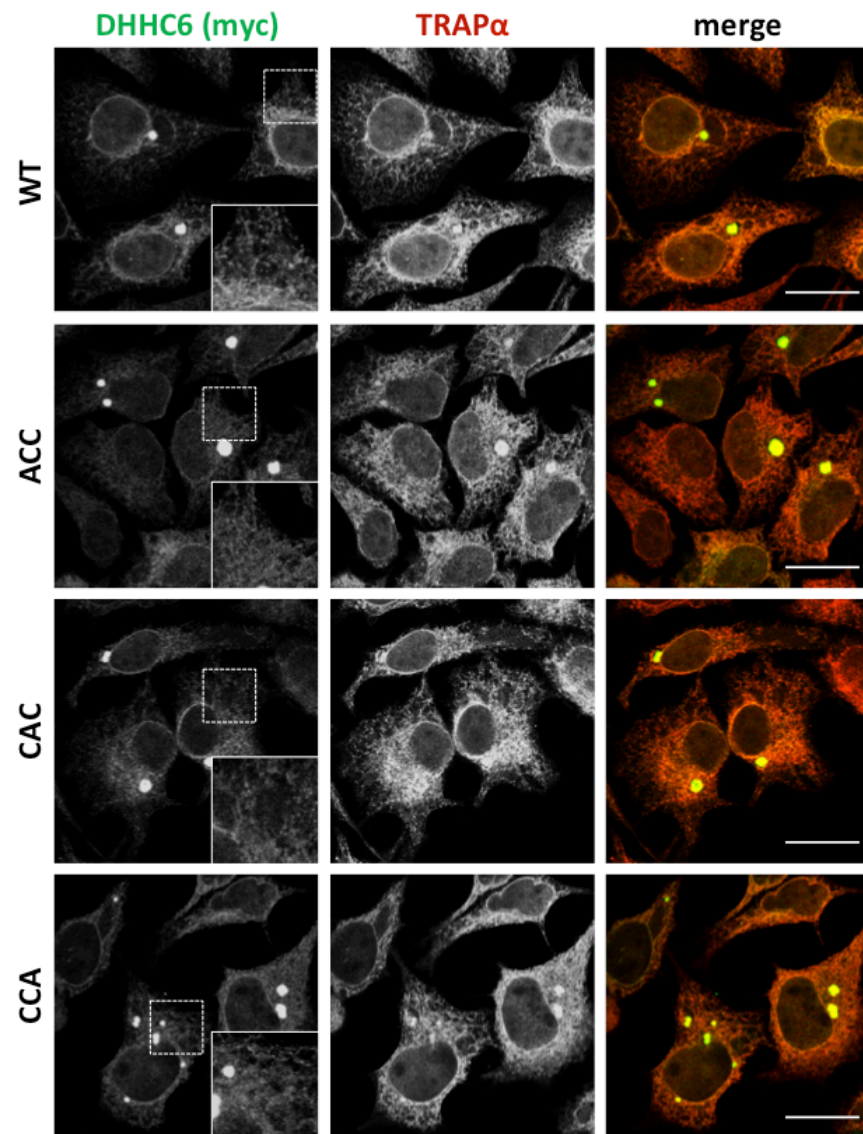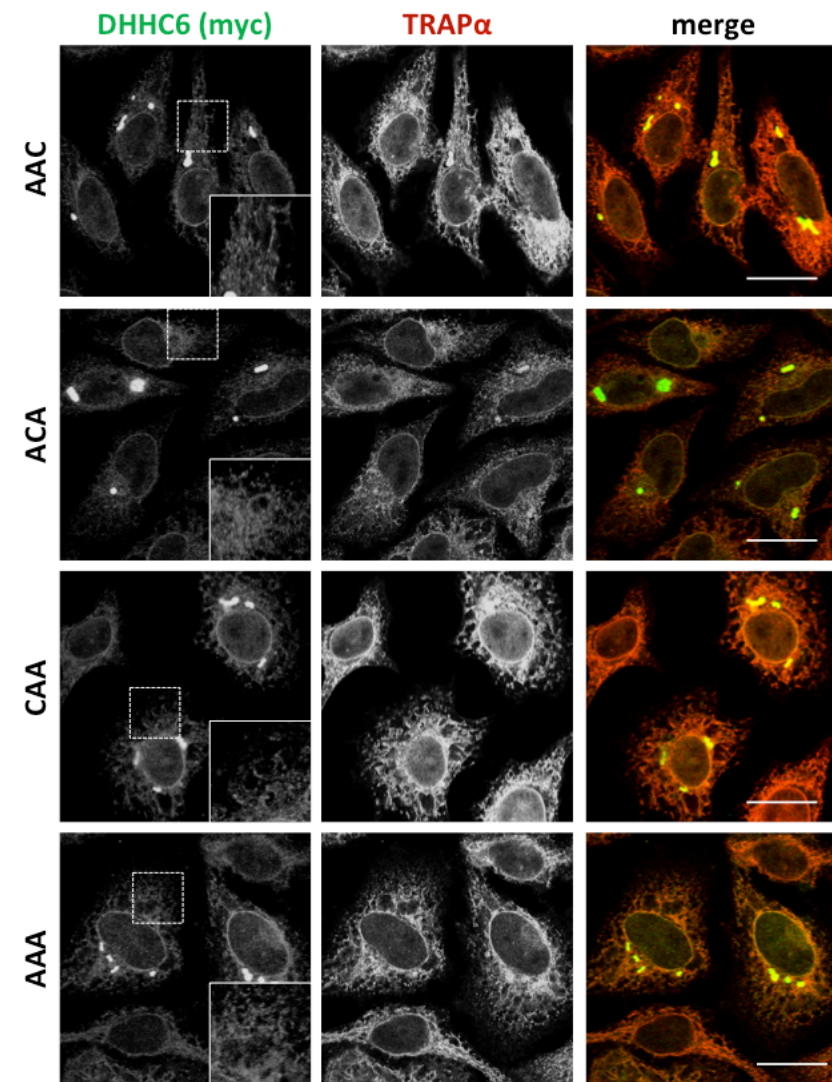

Supplement: supp [file elife-27826-supp-v1.zip]

**A**

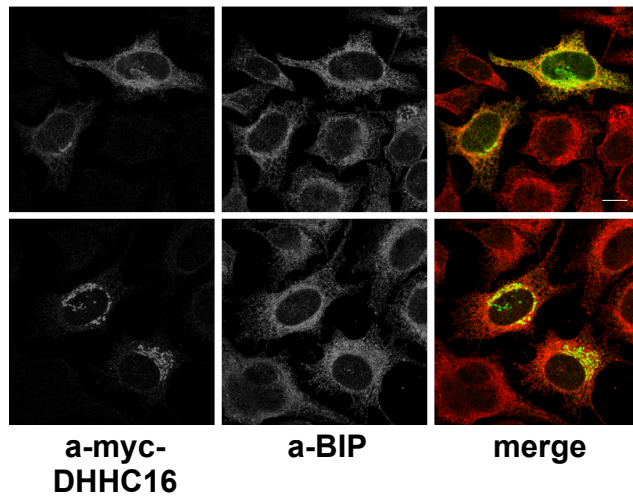

**B**

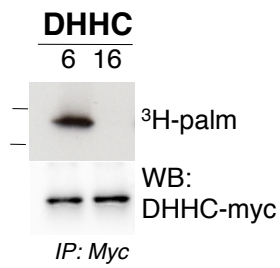

**C**

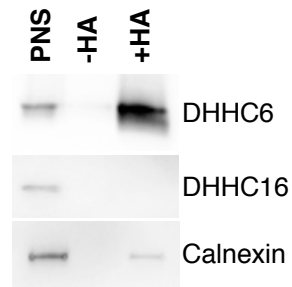

Supplement: supp [file elife-27826-supp-v1.zip]

**Validation**

- Simulated
- Experimental

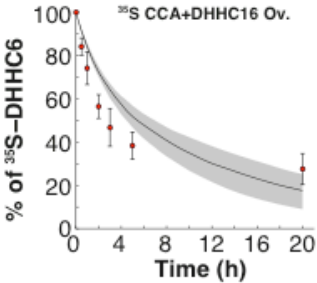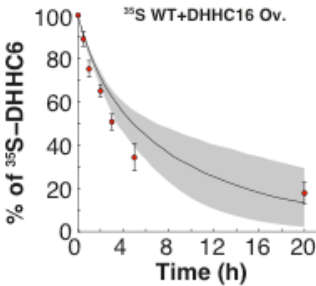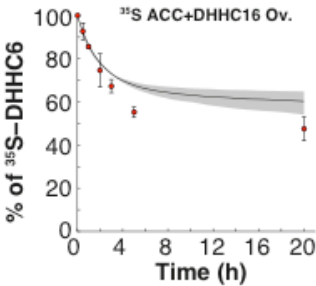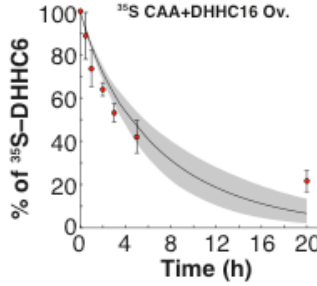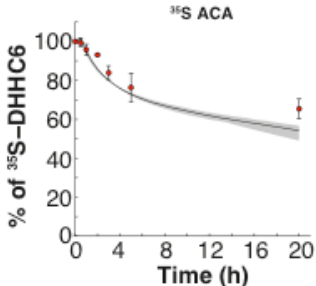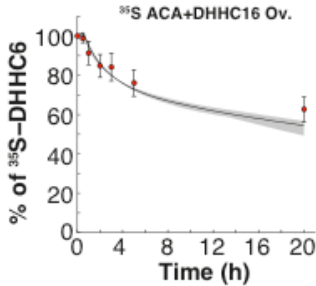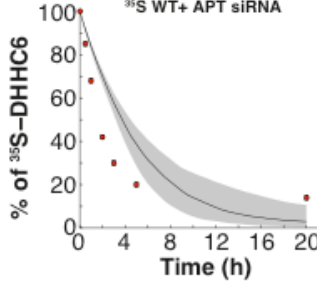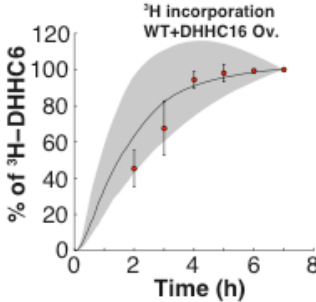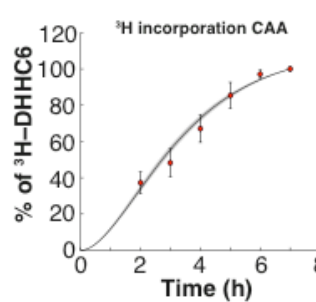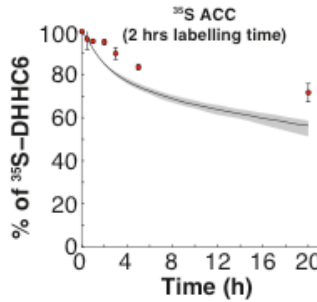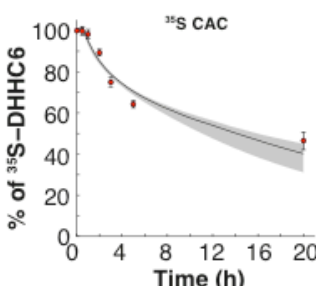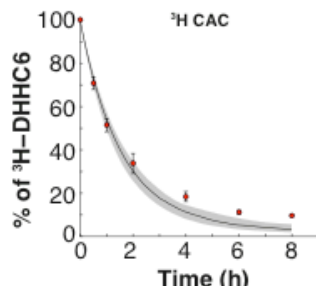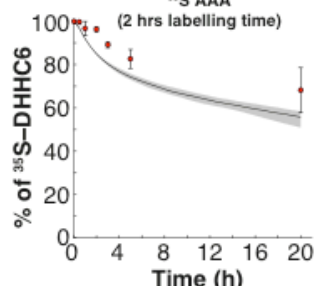

Supplement: supp [file elife-27826-supp-v1.zip]

**A**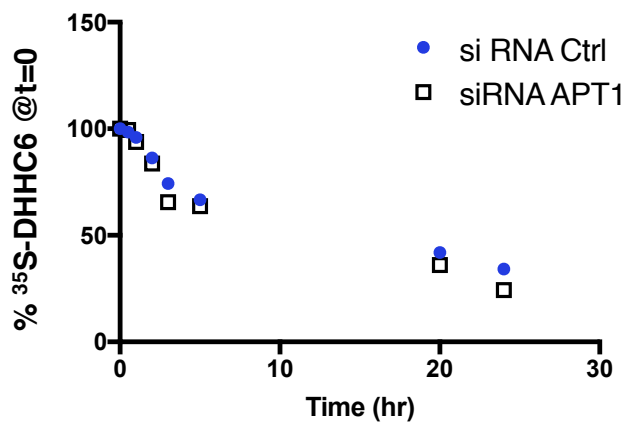**B**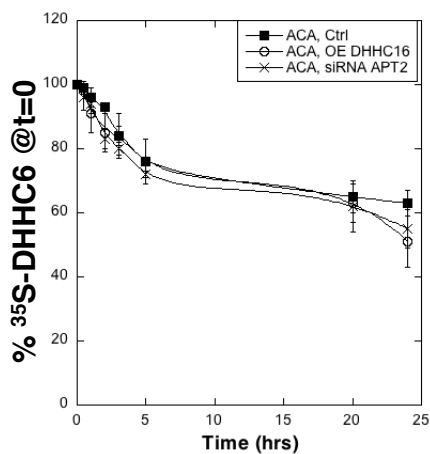**C**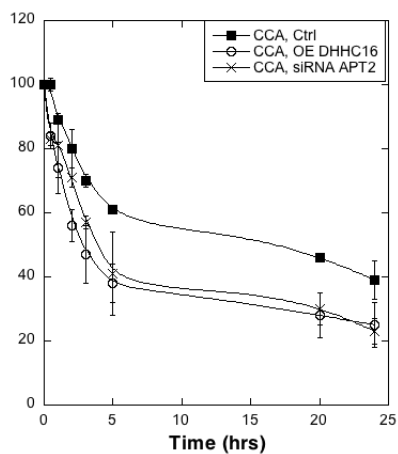

Supplement: supp [file elife-27826-supp-v1.zip]

**Calibration**

- Simulated  
● Experimental

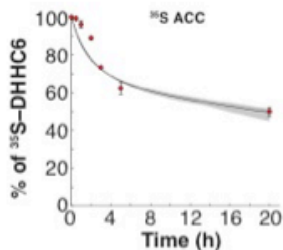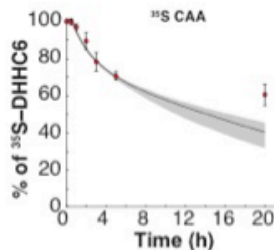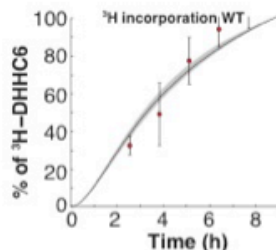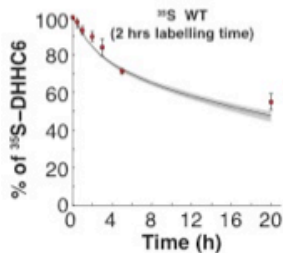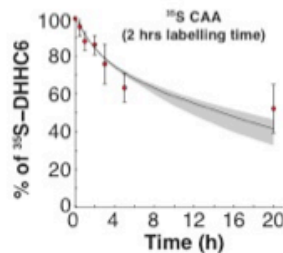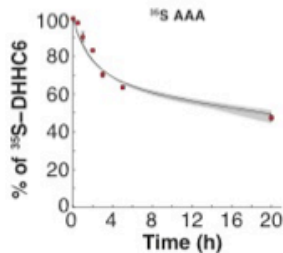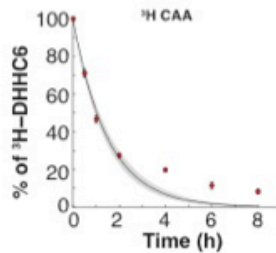

Supplement: supp [file elife-27826-supp-v1.zip]

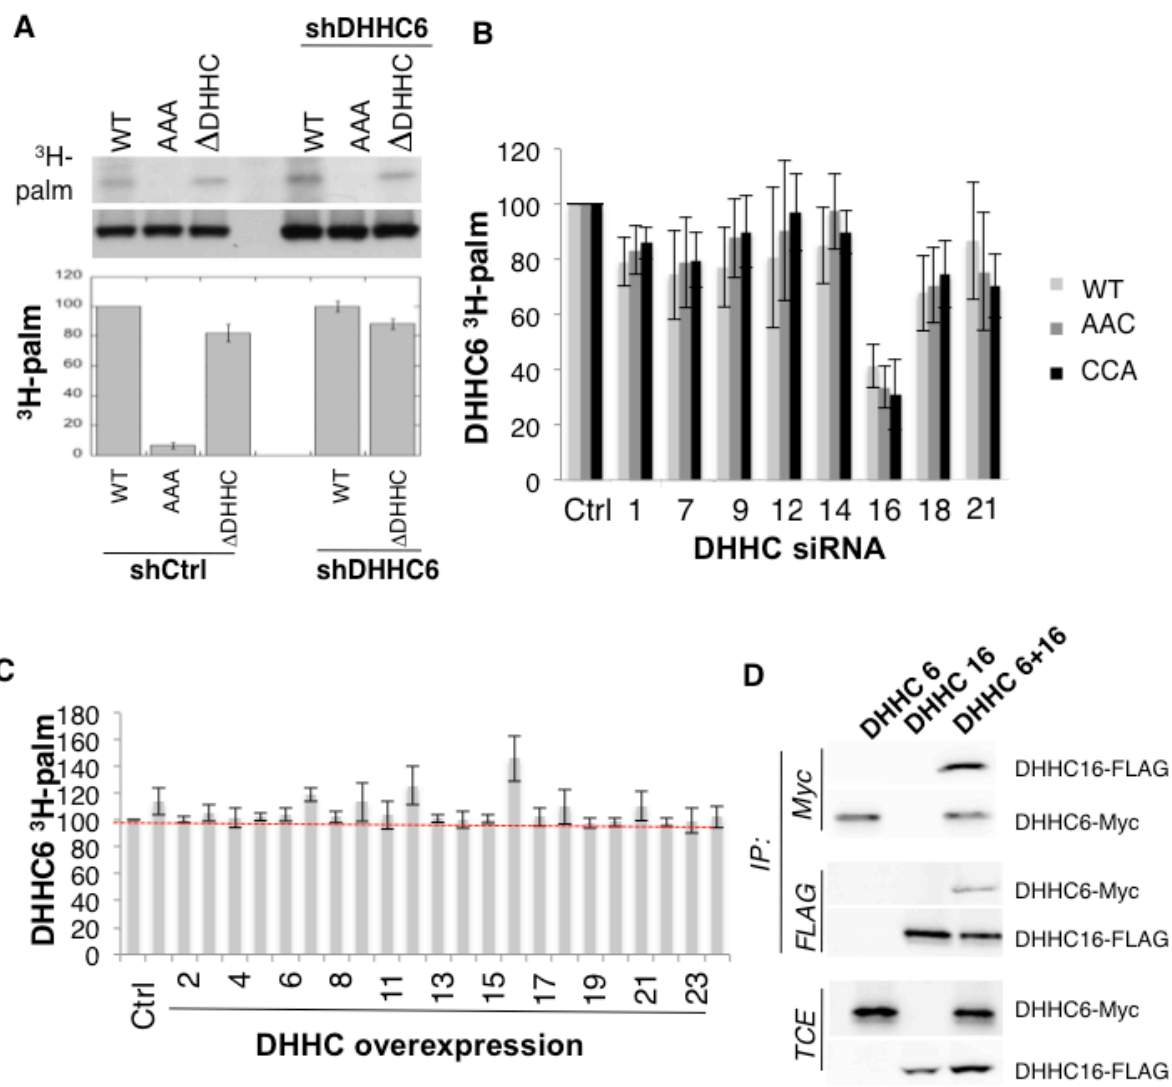

Supplement: supp [file elife-27826-supp-v1.zip]

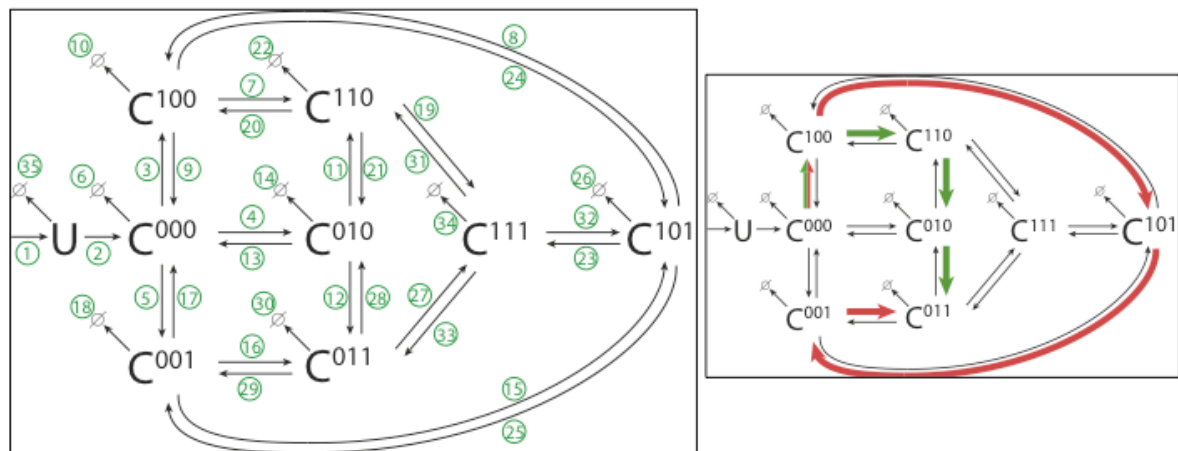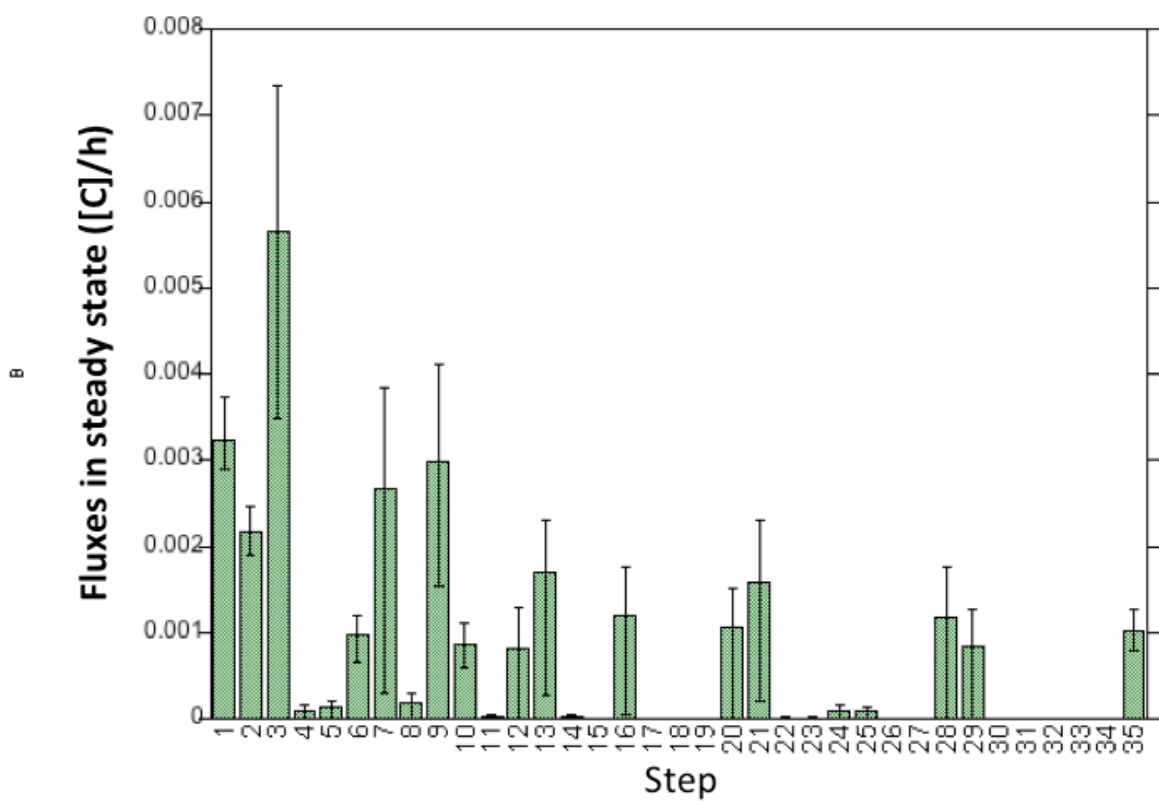

Supplement: supp [file elife-27826-supp-v1.zip]

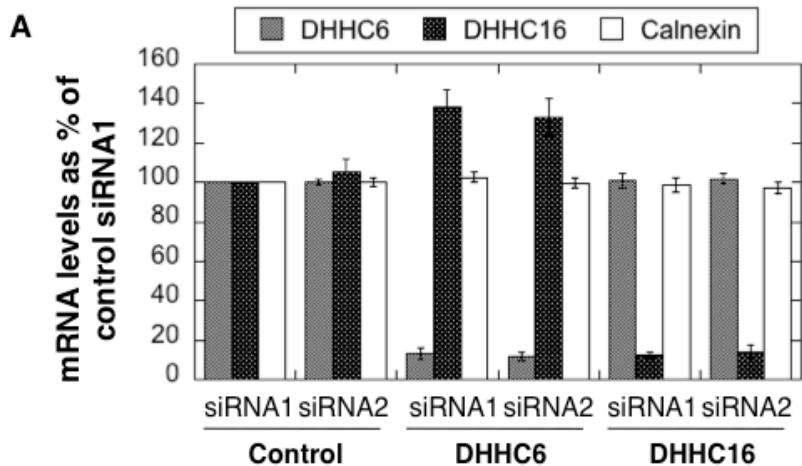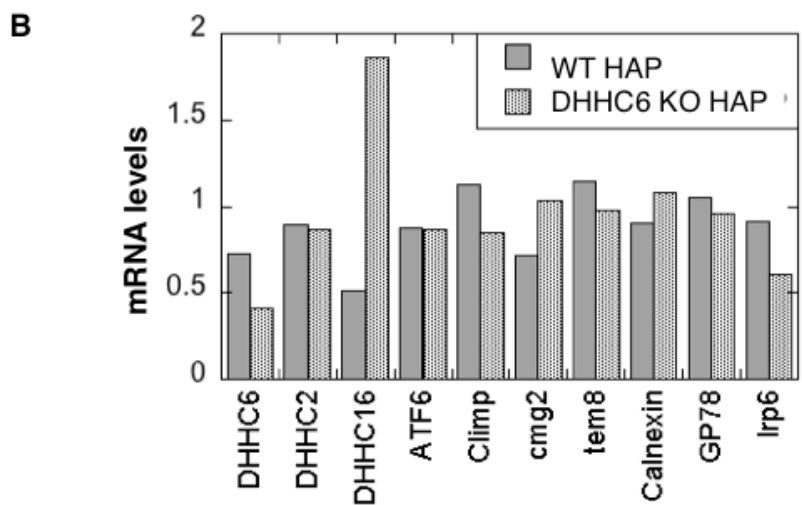

Supplement: supp [file elife-27826-supp-v1.zip]
